# Supplementary material for: Variation in zoobenthic blue carbon in the Arctic's Barents Sea shelf sediments
Source: Philos Trans A Math Phys Eng Sci. 2020 Aug 31;378(2181):20190362. doi: 10.1098/rsta.2019.0362 (PMC7481665; doi:10.1098/rsta.2019.0362)
Supplement: Supplementary data for ‘Variation in Zoobenthic blue carbon in the Arctic's Barents Sea Shelf Sediments [file rsta20190362supp1.xlsx]

## Sheet: Raw data
Units						degrees	degrees	meters	°C	μmol.L-1	μg.L-1	PSU	m.s-1	relative scale	relative scale	species	Individuals.m2	individuals per image	individuals per image	individuals per image	individuals per image	individuals per image	individuals per image	individuals per image	individuals per image	individuals per image	individuals per image	individuals per image	individuals per image	individuals per image	individuals per image	individuals per image	individuals per image	individuals per image	individuals per image	individuals per image	individuals per image	individuals per image	individuals per image	individuals per image	individuals per image	individuals per image	individuals per image	individuals per image	individuals per image	individuals per image	individuals per image	individuals per image	individuals per image
Column		Image ID	Time	Event Number	Location	Latitude	Longitude	Depth	temp	oxygen	chla	salinity	current velocity	substrate	rugosity	richness (Figure 4 Upper)	density (Figure 4 lower)	Polychaete annelids	gymnolaemate bryozoan	stenolaemate bryozoan	balanomorph barnacle crustaceans	colonial ascidian, chordates	solitary ascidian, chordates	priapulans	demospongiae, poiferans	errect gymnolaemate bryozoans	articulate brachiopod	crinoid echinoderm	basket star, echinoderms	suspension feeding malacostraca, crustacea	ophiuroid echinoderm	holothuroid echinoderm	deposit feeding polychaetes	sipunculans	echiurans	scaphopod molluscs	bivalve molluscs	burrowing echinoid, echinoderms	polyplacophora mollusc	gastropod mollusc	regular echinoid echinoderm	soft coral anthozoan cnidarians	actinaria anthozoan cnidarian	Seapen, anthozoan cnidarians	hydroid cnidarians	scleractinaria anthozoa cnidarian	Octocoral	errant polychaetes	nemerteans
C	Image unique number	ChAOS B3_2.01	2017-08-05 12:51:59	378	B3 2	72.6322	19.2477	368.52	3.94532	273.993	0.022041	35.0409	0.15	1	2	4	57.6	1							1	2																			4
D	Time and date of sample	ChAOS B3_2.02	2017-08-05 12:53:35	378	B3 2	72.6338	19.2477	362.88	3.94532	273.993	0.022041	35.0409	0.15	16	1	5	64.8			3						1																1			3
E	Event number on cruise JR17001	ChAOS B3_2.03	2017-08-05 12:54:22	378	B3 2	72.6338	19.2476	362.79	3.94532	273.993	0.022041	35.0409	0.15	1	1	6	72	2		1					2	1									1										3
F	Site name	ChAOS B3_2.04	2017-08-05 12:55:29	378	B3 2	72.6338	19.2475	363.18	3.94532	273.993	0.022041	35.0409	0.15	1	1	6	64.8	1		1					1	2	1																		3
G	Latitude (decimal)	ChAOS B3_2.05	2017-08-05 12:56:33	378	B3 2	72.6338	19.2474	362.94	3.94532	273.993	0.022041	35.0409	0.15	1	1	2	72									7																			3
H	Longitude (decimal)	ChAOS B3_2.06	2017-08-05 12:57:33	378	B3 2	72.6338	19.2473	362.65	3.94532	273.993	0.022041	35.0409	0.15	1	1	4	93.6								5	4																			2
I	Depth (m) measured by A=EA600 instrument	ChAOS B3_2.07	2017-08-05 12:58:32	378	B3 2	72.6338	19.2472	362.69	3.94532	273.993	0.022041	35.0409	0.15	1	1	3	36			1					1	3
J	Sea temperature from CTD measurement	ChAOS B3_2.08	2017-08-05 12:59:31	378	B3 2	72.6337	19.2471	362.65	3.94532	273.993	0.022041	35.0409	0.15	1	1	4	50.4	1							2	2																			2
K	Oxygen level from CTD measurement	ChAOS B3_2.09	2017-08-05 13:00:27	378	B3 2	72.6337	19.2471	362.58	3.94532	273.993	0.022041	35.0409	0.15	16	2	7	100.8	1	2	5					1	2																	1		2
L	Chlorophyll a from CTD measurement	ChAOS B3_2.10	2017-08-05 13:01:32	378	B3 2	72.6336	19.2471	362.96	3.94532	273.993	0.022041	35.0409	0.15	1	1	4	64.8	1								2												1							5
M	Salinity (PPT) from CTD measurement	ChAOS B3_2.11	2017-08-05 13:02:35	378	B3 2	72.6336	19.247	363.7	3.94532	273.993	0.022041	35.0409	0.15	1	1	4	86.4			1					2	4																			5
N	Current velocity (m per second)	ChAOS B3_2.12	2017-08-05 13:03:39	378	B3 2	72.6335	19.247	364.19	3.94532	273.993	0.022041	35.0409	0.15	1	1	4	72								1	4									2										3
O	Substrate type as below	ChAOS B3_2.13	2017-08-05 13:04:43	378	B3 2	72.6335	19.247	364.07	3.94532	273.993	0.022041	35.0409	0.15	1	1	2	43.2									2																			4
		ChAOS B3_2.14	2017-08-05 13:05:32	378	B3 2	72.6334	19.247	364.57	3.94532	273.993	0.022041	35.0409	0.15	1	1	4	64.8	3							1	2																			3
1	mud/Fine sand	ChAOS B3_2.15	2017-08-05 13:06:37	378	B3 2	72.6334	19.247	364.84	3.94532	273.993	0.022041	35.0409	0.15	1	1	3	57.6	2								4																			2
2	coarse sand	ChAOS B3_2.16	2017-08-05 13:07:35	378	B3 2	72.6333	19.247	365.34	3.94532	273.993	0.022041	35.0409	0.15	1	1	2	72									8																			2
3	fine pebbles	ChAOS B3_2.17	2017-08-05 13:08:27	378	B3 2	72.6333	19.2471	365.64	3.94532	273.993	0.022041	35.0409	0.15	1	1	5	72	1							1	6									1										1
4	coarse pebbles	ChAOS B3_2.18	2017-08-05 13:09:30	378	B3 2	72.6332	19.247	365.75	3.94532	273.993	0.022041	35.0409	0.15	1	1	2	57.6									4																			4
5	cobbles	ChAOS B3_2.19	2017-08-05 13:10:30	378	B3 2	72.6332	19.247	366.49	3.94532	273.993	0.022041	35.0409	0.15	15	1	2	21.6								1																				2
6	rocks	ChAOS B3_2.20	2017-08-05 13:11:28	378	B3 2	72.6325	19.2472	369.35	3.94532	273.993	0.022041	35.0409	0.15	1	1	2	57.6								2	6
7	large rocks	ChAOS B3_5.01	2017-08-05 13:19:08	378	B3 5	72.6325	19.2472	369.35	3.94532	273.993	0.022041	35.0409	0.15	1	1	3	43.2									3																			2
8	boulder/bedrock	ChAOS B3_5.02	2017-08-05 13:20:30	378	B3 5	72.6324	19.2471	369.17	3.94532	273.993	0.022041	35.0409	0.15	1	1	2	28.8									2																			2
9	biogenic	ChAOS B3_5.03	2017-08-05 13:21:14	378	B3 5	72.6323	19.2471	368.84	3.94532	273.993	0.022041	35.0409	0.15	1	1	3	28.8								1	1																			2
		ChAOS B3_5.04	2017-08-05 13:21:59	378	B3 5	72.6323	19.2472	369.17	3.94532	273.993	0.022041	35.0409	0.15	1	1	3	43.2									3									2
P	Rugosity as below	ChAOS B3_5.05	2017-08-05 13:22:56	378	B3 5	72.6323	19.2472	368.99	3.94532	273.993	0.022041	35.0409	0.15	1	1	3	28.8	1								1									2
		ChAOS B3_5.06	2017-08-05 13:23:54	378	B3 5	72.6322	19.2473	368.64	3.94532	273.993	0.022041	35.0409	0.15	1	1	5	57.6	2								3									1										1
0	smooth <1mm	ChAOS B3_5.07	2017-08-05 13:24:59	378	B3 5	72.6322	19.2475	368.63	3.94532	273.993	0.022041	35.0409	0.15	1	1	2	21.6								1	2
1	1-10mm	ChAOS B3_5.08	2017-08-05 13:25:59	378	B3 5	72.6321	19.2476	368.47	3.94532	273.993	0.022041	35.0409	0.15	1	1	2	14.4	1																	1
2	11-10mm	ChAOS B3_5.09	2017-08-05 13:26:56	378	B3 5	72.6322	19.2477	368.52	3.94532	273.993	0.022041	35.0409	0.15	1	1	2	50.4									6									1
3	21-30mm	ChAOS B3_5.10	2017-08-05 13:28:05	378	B3 5	72.6322	19.2479	368.53	3.94532	273.993	0.022041	35.0409	0.15	1	1	2	28.8									3
4	31-40mm	ChAOS B3_5.11	2017-08-05 13:28:56	378	B3 5	72.6321	19.2481	368.31	3.94532	273.993	0.022041	35.0409	0.15	1	1	2	21.6	1								2
5	41-50mm or greater	ChAOS B3_5.12	2017-08-05 13:29:55	378	B3 5	72.6321	19.2482	368.2	3.94532	273.993	0.022041	35.0409	0.15	1	1	2	14.4	1																											1
		ChAOS B3_5.13	2017-08-05 13:31:09	378	B3 5	72.6322	19.2485	367.79	3.94532	273.993	0.022041	35.0409	0.15	1	1	2	50.4									6												1
Q	Richness (total number of morphotypes)	ChAOS B3_5.14	2017-08-05 13:31:57	378	B3 5	72.6322	19.2487	367.77	3.94532	273.993	0.022041	35.0409	0.15	1	1	3	36									3																			1
R	Number of individuals	ChAOS B3_5.15	2017-08-05 13:32:55	378	B3 5	72.6322	19.2489	367.99	3.94532	273.993	0.022041	35.0409	0.15	1	1	4	36								1	2									1										1
		ChAOS B3_5.16	2017-08-05 13:33:55	378	B3 5	72.6322	19.2489	367.22	3.94532	273.993	0.022041	35.0409	0.15	1	1	2	21.6									2																			1
S-BJ	Morphotype occurrence by functional group	ChAOS B3_5.17	2017-08-05 13:34:47	378	B3 5	72.6322	19.2491	367.23	3.94532	273.993	0.022041	35.0409	0.15	1	1	3	28.8	1								2																			1
	Functional group key	ChAOS B3_5.18	2017-08-05 13:35:50	378	B3 5	72.6322	19.2492	367.15	3.94532	273.993	0.022041	35.0409	0.15	1	1	2	36									4																			1
SP	Pioneer suspension feeders	ChAOS B3_5.19	2017-08-05 13:36:48	378	B3 5	72.6322	19.2495	366.82	3.94532	273.993	0.022041	35.0409	0.15	1	1	3	36									2																			2
SC	Climax suspension feeders	ChAOS B3_5.20	2017-08-05 13:37:41	378	B3 5	72.6321	19.2497	366.6	3.94532	273.993	0.022041	35.0409	0.15	1	1	2	43.2								1	5
SS	Sedentary suspension feeders	ChAOS B3_4.01	2017-08-05 13:47:01	378	B3 4	72.6321	19.2522	364.46	3.94532	273.993	0.022041	35.0409	0.15	1	1	1	21.6									3
SM	Sessile suspension feeders	ChAOS B3_4.02	2017-08-05 13:48:03	378	B3 4	72.6321	19.2523	364.33	3.94532	273.993	0.022041	35.0409	0.15	1	1	2	36									4										1
DC	Deposit feeding crawlers	ChAOS B3_4.03	2017-08-05 13:49:04	378	B3 4	72.6321	19.2524	364.34	3.94532	273.993	0.022041	35.0409	0.15	1	1	1	72									10
DV	Deposit feeding worms	ChAOS B3_4.04	2017-08-05 13:49:58	378	B3 4	72.6321	19.2525	364.62	3.94532	273.993	0.022041	35.0409	0.15	1	1	1	28.8									4
DS	Shelled deposit feeders	ChAOS B3_4.05	2017-08-05 13:50:53	378	B3 4	72.6322	19.2526	367.53	3.94532	273.993	0.022041	35.0409	0.15	1	1	3	36								1	3																			1
GC	Grazers	ChAOS B3_4.06	2017-08-05 13:51:51	378	B3 4	72.6322	19.2525	365.46	3.94532	273.993	0.022041	35.0409	0.15	1	1	3	36			1					1	3
PS	Sessile soft bodied predators	ChAOS B3_4.07	2017-08-05 13:52:47	378	B3 4	72.6323	19.2526	365.98	3.94532	273.993	0.022041	35.0409	0.15	1	2	3	36								1	3
PC	Mobile soft bodied predators	ChAOS B3_4.08	2017-08-05 13:53:39	378	B3 4	72.6322	19.2525	365.46	3.94532	273.993	0.022041	35.0409	0.15	1	1	1	21.6									3
PM	Sessile hard bodied predators	ChAOS B3_4.09	2017-08-05 13:55:01	378	B3 4	72.6324	19.2527	367.17	3.94532	273.993	0.022041	35.0409	0.15	1	1	5	57.6			1					1	2	2																		2
PL	Mobile hard bodied predators	ChAOS B3_4.10	2017-08-05 13:56:05	378	B3 4	72.6325	19.2527	366.57	3.94532	273.993	0.022041	35.0409	0.15	15	2	4	79.2			3					3	2																			3
PA	Arthropod predators	ChAOS B3_4.11	2017-08-05 13:57:00	378	B3 4	72.6325	19.2528	366.36	3.94532	273.993	0.022041	35.0409	0.15	1	1	1	21.6									3
Mixed	Flexible strategy (more than one of the above)	ChAOS B3_4.12	2017-08-05 13:57:59	378	B3 4	72.6326	19.2527	366.16	3.94532	273.993	0.022041	35.0409	0.15	1	1	3	28.8								1	2																			1
		ChAOS B3_4.13	2017-08-05 13:59:04	378	B3 4	72.6326	19.2526	365.86	3.94532	273.993	0.022041	35.0409	0.15	1	1	2	50.4									3																			4
		ChAOS B3_4.14	2017-08-05 13:59:58	378	B3 4	72.6327	19.2527	365.47	3.94532	273.993	0.022041	35.0409	0.15	15	2	3	57.6			1						4																			3
		ChAOS B3_4.15	2017-08-05 14:00:51	378	B3 4	72.6328	19.2528	365.41	3.94532	273.993	0.022041	35.0409	0.15	1	1	3	64.8								2	5																			2
		ChAOS B3_4.16	2017-08-05 14:01:49	378	B3 4	72.6328	19.2527	365.42	3.94532	273.993	0.022041	35.0409	0.15	1	1	3	72								1	6																			3
		ChAOS B3_4.17	2017-08-05 14:02:44	378	B3 4	72.6329	19.2528	365.33	3.94532	273.993	0.022041	35.0409	0.15	1	1	3	86.4									7											2								3
		ChAOS B3_4.18	2017-08-05 14:03:43	378	B3 4	72.6329	19.2527	364.72	3.94532	273.993	0.022041	35.0409	0.15	1	1	2	50.4									5																			2
		ChAOS B3_4.19	2017-08-05 14:04:41	378	B3 4	72.633	19.2527	363.76	3.94532	273.993	0.022041	35.0409	0.15	1	1	2	21.6																												2
		ChAOS B3_4.20	2017-08-05 14:05:38	378	B3 4	72.6331	19.2527	363.56	3.94532	273.993	0.022041	35.0409	0.15	1	1	2	43.2									3																			3
		ChAOS B3_1.01	2017-08-05 14:21:30	378	B3 1	72.6338	19.2502	362.3	3.94532	273.993	0.022041	35.0409	0.15	1	1	3	72								1	8																			1
		ChAOS B3_1.02	2017-08-05 14:22:22	378	B3 1	72.6338	19.2501	362.42	3.94532	273.993	0.022041	35.0409	0.15	18	3	8	122.4	2	3			1			4	2	1																		2
		ChAOS B3_1.03	2017-08-05 14:23:52	378	B3 1	72.6339	19.2499	361.94	3.94532	273.993	0.022041	35.0409	0.15	1	1	1	64.8									9
		ChAOS B3_1.04	2017-08-05 14:24:50	378	B3 1	72.6339	19.2499	362.32	3.94532	273.993	0.022041	35.0409	0.15	1	1	4	79.2								2	6												1							2
		ChAOS B3_1.05	2017-08-05 14:25:47	378	B3 1	72.634	19.2499	362.16	3.94532	273.993	0.022041	35.0409	0.15	1	1	2	50.4									6																			1
		ChAOS B3_1.06	2017-08-05 14:26:46	378	B3 1	72.634	19.2499	362.35	3.94532	273.993	0.022041	35.0409	0.15	1	1	3	50.4									5																			1
		ChAOS B3_1.07	2017-08-05 14:27:38	378	B3 1	72.634	19.25	362.41	3.94532	273.993	0.022041	35.0409	0.15	1	1	3	43.2			1					3	2
		ChAOS B3_1.08	2017-08-05 14:28:31	378	B3 1	72.634	19.2501	362.41	3.94532	273.993	0.022041	35.0409	0.15	1	1	2	28.8									2
		ChAOS B3_1.09	2017-08-05 14:29:32	378	B3 1	72.634	19.2502	362.98	3.94532	273.993	0.022041	35.0409	0.15	1	1	3	28.8	1								2																			1
		ChAOS B3_1.10	2017-08-05 14:30:28	378	B3 1	72.634	19.2503	362.78	3.94532	273.993	0.022041	35.0409	0.15	1	1	4	28.8			1					1	1
		ChAOS B3_1.11	2017-08-05 14:31:21	378	B3 1	72.634	19.2505	362.89	3.94532	273.993	0.022041	35.0409	0.15	17	2	4	64.8		5						2	1																	1
		ChAOS B3_1.12	2017-08-05 14:32:13	378	B3 1	72.634	19.2506	362.77	3.94532	273.993	0.022041	35.0409	0.15	1	1	2	21.6									1																			2
		ChAOS B3_1.13	2017-08-05 14:33:07	378	B3 1	72.634	19.2507	362.57	3.94532	273.993	0.022041	35.0409	0.15	1	1	4	43.2			1						3																			1
		ChAOS B3_1.14	2017-08-05 14:34:01	378	B3 1	72.634	19.2508	362.76	3.94532	273.993	0.022041	35.0409	0.15	15	1	2	14.4									1																			1
		ChAOS B3_1.15	2017-08-05 14:35:01	378	B3 1	72.634	19.251	362.75	3.94532	273.993	0.022041	35.0409	0.15	1	1	3	64.8			1						5																			3
		ChAOS B3_1.16	2017-08-05 14:35:56	378	B3 1	72.634	19.2512	362.62	3.94532	273.993	0.022041	35.0409	0.15	1	1	3	57.6									6												1							1
		ChAOS B3_1.17	2017-08-05 14:36:48	378	B3 1	72.634	19.2513	362.71	3.94532	273.993	0.022041	35.0409	0.15	1	1	4	64.8			1						3							1												4
		ChAOS B3_1.18	2017-08-05 14:37:39	378	B3 1	72.634	19.2514	362.87	3.94532	273.993	0.022041	35.0409	0.15	1	1	2	57.6									3																			5
		ChAOS B3_1.19	2017-08-05 14:38:34	378	B3 1	72.634	19.2517	363	3.94532	273.993	0.022041	35.0409	0.15	1	1	2	50.4									3																			4
		ChAOS B3_1.20	2017-08-05 14:39:32	378	B3 1	72.634	19.2518	362.76	3.94532	273.993	0.022041	35.0409	0.15	1	1	4	72			1						3											1								5
		ChAOS B13_1.01	2017-07-16 01:00:53	100	B13 1	74.5009	30.0037	358.25	1.77889	294.682	0.060217	35.0028	0.12	1	1	5	36									1						1	1			1	1
		ChAOS B13_1.02	2017-07-16 01:08:39	100	B13 1	74.5009	30.0027	358.01	1.77889	294.682	0.060217	35.0028	0.12	1	1	2	14.4																1	1
		ChAOS B13_1.03	2017-07-16 01:14:10	100	B13 1	74.5009	30.0028	357.9	1.77889	294.682	0.060217	35.0028	0.12	1	1	2	14.4															1	1
		ChAOS B13_1.04	2017-07-16 01:16:15	100	B13 1	74.5009	30.0029	358.04	1.77889	294.682	0.060217	35.0028	0.12	1	1	2	21.6																1
		ChAOS B13_1.05	2017-07-16 01:23:36	100	B13 1	74.5009	30.0024	358.52	1.77889	294.682	0.060217	35.0028	0.12	1	1	1	14.4																2
		ChAOS B13_1.06	2017-07-16 01:25:57	100	B13 1	74.5008	30.0021	358.61	1.77889	294.682	0.060217	35.0028	0.12	1	1	3	28.8																1
		ChAOS B13_1.07	2017-07-17 01:27:00	101	B13 2	74.5004	30.002	258.5	1.77889	294.682	0.060217	35.0028	0.12	1	1	2	14.4																1				1
		ChAOS B13_1.08	2017-07-16 01:28:14	100	B13 1	74.5008	30.0019	358.35	1.77889	294.682	0.060217	35.0028	0.12	1	1	3	21.6																1
		ChAOS B13_1.09	2017-07-16 01:29:16	100	B13 1	74.5008	30.0017	358.74	1.77889	294.682	0.060217	35.0028	0.12	1	1	1	7.2																1
		ChAOS B13_1.10	2017-07-16 01:30:11	100	B13 1	74.5008	30.0016	358.61	1.77889	294.682	0.060217	35.0028	0.12	1	1	2	14.4																1												1
		ChAOS B13_1.11	2017-07-16 01:31:08	100	B13 1	74.5007	30.0014	358.38	1.77889	294.682	0.060217	35.0028	0.12	1	1	3	36																				1								1
		ChAOS B13_1.12	2017-07-16 01:33:07	100	B13 1	74.5007	30.0011	358.7	1.77889	294.682	0.060217	35.0028	0.12	1	1	2	14.4																										1
		ChAOS B13_1.13	2017-07-16 01:33:23	100	B13 1	74.5007	30.0011	358.61	1.77889	294.682	0.060217	35.0028	0.12	1	1	3	28.8																1		2
		ChAOS B13_1.14	2017-07-16 01:34:14	100	B13 1	74.5007	30.0009	358.71	1.77889	294.682	0.060217	35.0028	0.12	1	1	1	14.4																2
		ChAOS B13_1.15	2017-07-16 01:35:05	100	B13 1	74.5006	30.0008	358.59	1.77889	294.682	0.060217	35.0028	0.12	1	1	2	21.6																1
		ChAOS B13_1.16	2017-07-16 01:35:55	100	B13 1	74.5006	30.0006	358.83	1.77889	294.682	0.060217	35.0028	0.12	1	1	4	28.8									1		1
		ChAOS B13_1.17	2017-07-16 01:37:40	100	B13 1	74.5006	30.0004	358.67	1.77889	294.682	0.060217	35.0028	0.12	1	1	4	28.8																1
		ChAOS B13_1.18	2017-07-16 01:38:18	100	B13 1	74.5006	30.0002	358.88	1.77889	294.682	0.060217	35.0028	0.12	1	1	4	28.8															1	1				1
		ChAOS B13_1.19	2017-07-16 01:38:56	100	B13 1	74.5006	30.0001	358.96	1.77889	294.682	0.060217	35.0028	0.12	1	1	4	28.8		1						1								1			1
		ChAOS B13_1.20	2017-07-16 01:41:50	100	B13 1	74.5005	29.9993	359	1.77889	294.682	0.060217	35.0028	0.12	1	1	1	7.2																1
		ChAOS B13_2.01	2017-07-16 15:12:50	110	B13 2	74.5004	29.9993	358.74	1.77889	294.682	0.060217	35.0028	0.12	1	1	3	64.8																2	1
		ChAOS B13_2.02	2017-07-16 15:19:30	110	B13 2	74.5004	29.9993	358.81	1.77889	294.682	0.060217	35.0028	0.12	15	1	5	36	1	1						1								1
		ChAOS B13_2.03	2017-07-16 15:23:17	110	B13 2	74.5005	29.9991	358.62	1.77889	294.682	0.060217	35.0028	0.12	1	1	2	14.4																1
		ChAOS B13_2.04	2017-07-16 15:25:24	110	B13 2	74.5005	29.999	358.94	1.77889	294.682	0.060217	35.0028	0.12	1	1	3	21.6																1
		ChAOS B13_2.05	2017-07-16 15:26:46	110	B13 2	74.5005	29.9989	358.77	1.77889	294.682	0.060217	35.0028	0.12	1	1	2	14.4																1															1
		ChAOS B13_2.06	2017-07-16 15:28:11	110	B13 2	74.5005	29.9988	359.06	1.77889	294.682	0.060217	35.0028	0.12	1	1	2	21.6																2
		ChAOS B13_2.07	2017-07-16 15:28:55	110	B13 2	74.5006	29.9989	359.01	1.77889	294.682	0.060217	35.0028	0.12	1	1	3	43.2																3		1		2
		ChAOS B13_2.08	2017-07-16 15:31:09	110	B13 2	74.5006	29.9989	359.1	1.77889	294.682	0.060217	35.0028	0.12	1	1	3	21.6	1															1
		ChAOS B13_2.09	2017-07-16 15:33:52	110	B13 2	74.5006	29.9989	359.17	1.77889	294.682	0.060217	35.0028	0.12	15	1	5	36								1								1				1					1	1
		ChAOS B13_2.10	2017-07-16 15:35:35	110	B13 2	74.5006	29.9983	359.28	1.77889	294.682	0.060217	35.0028	0.12	1	1	2	21.6									1
		ChAOS B13_2.11	2017-07-16 15:37:15	110	B13 2	74.5007	29.9982	359.35	1.77889	294.682	0.060217	35.0028	0.12	1	1	2	21.6																		1
		ChAOS B13_2.12	2017-07-16 15:39:17	110	B13 2	74.5007	29.9981	359.69	1.77889	294.682	0.060217	35.0028	0.12	1	1	3	28.8									1							2				1
		ChAOS B13_2.13	2017-07-16 15:41:16	110	B13 2	74.5007	29.998	359.58	1.77889	294.682	0.060217	35.0028	0.12	1	1	2	36																2				3
		ChAOS B13_2.14	2017-07-16 15:43:02	110	B13 2	74.5008	29.9979	359.83	1.77889	294.682	0.060217	35.0028	0.12	1	1	3	28.8																1				1
		ChAOS B13_2.15	2017-07-16 15:45:03	110	B13 2	74.5008	29.9979	359.78	1.77889	294.682	0.060217	35.0028	0.12	1	1	5	36								1		1										1											1
		ChAOS B13_2.16	2017-07-16 15:46:52	110	B13 2	74.5008	29.9978	360.18	1.77889	294.682	0.060217	35.0028	0.12	1	1	4	28.8			1																	1					1
		ChAOS B13_2.17	2017-07-16 15:48:46	110	B13 2	74.5009	29.9975	360.28	1.77889	294.682	0.060217	35.0028	0.12	1	1	3	36																				2					1
		ChAOS B13_2.18	2017-07-16 15:50:45	110	B13 2	74.5009	29.9976	360.39	1.77889	294.682	0.060217	35.0028	0.12	1	1	3	43.2								1																	1
		ChAOS B13_2.19	2017-07-16 15:52:21	110	B13 2	74.5009	29.9974	359.95	1.77889	294.682	0.060217	35.0028	0.12	1	1	2	21.6																1				2
		ChAOS B13_2.20	2017-07-16 15:54:11	110	B13 2	74.501	29.9973	360.1	1.77889	294.682	0.060217	35.0028	0.12	1	1	4	93.6									1							1				10
		ChAOS B13_4.01	2017-07-16 13:30:12	109	B13 4	74.499	30.0049	358.17	1.77889	294.682	0.060217	35.0028	0.12	1	1	2	14.4																1
		ChAOS B13_4.02	2017-07-16 13:35:36	109	B13 4	74.499	30.0046	357.97	1.77889	294.682	0.060217	35.0028	0.12	1	1	2	14.4																1															1
		ChAOS B13_4.03	2017-07-16 13:40:47	109	B13 4	74.4991	30.0044	358.05	1.77889	294.682	0.060217	35.0028	0.12	1	1	2	14.4																1															1
		ChAOS B13_4.04	2017-07-16 13:42:08	109	B13 4	74.4991	30.0043	357.89	1.77889	294.682	0.060217	35.0028	0.12	1	1	3	28.8																				2
		ChAOS B13_4.05	2017-07-16 13:46:11	109	B13 4	74.4991	30.0042	357.94	1.77889	294.682	0.060217	35.0028	0.12	1	1	2	14.4																1
		ChAOS B13_4.06	2017-07-16 13:49:29	109	B13 4	74.4992	30.0041	358.31	1.77889	294.682	0.060217	35.0028	0.12	1	1	4	50.4			2												1	1
		ChAOS B13_4.07	2017-07-16 13:52:56	109	B13 4	74.499	30.0046	357.97	1.77889	294.682	0.060217	35.0028	0.12	1	1	4	57.6			3													1				2
		ChAOS B13_4.08	2017-07-16 13:59:53	109	B13 4	74.4993	30.0035	358.27	1.77889	294.682	0.060217	35.0028	0.12	1	1	2	21.6			2													1
		ChAOS B13_4.09	2017-07-16 14:00:16	109	B13 4	74.4991	30.0028	358.63	1.77889	294.682	0.060217	35.0028	0.12	1	1	3	28.8			2																												1
		ChAOS B13_4.10	2017-07-16 14:02:23	109	B13 4	74.4993	30.0035	358.4	1.77889	294.682	0.060217	35.0028	0.12	1	1	2	14.4																1															1
		ChAOS B13_4.11	2017-07-16 14:04:18	109	B13 4	74.4994	30.0033	358.28	1.77889	294.682	0.060217	35.0028	0.12	1	1	2	14.4			1													1
		ChAOS B13_4.12	2017-07-16 14:06:12	109	B13 4	74.4994	30.0033	358.72	1.77889	294.682	0.060217	35.0028	0.12	1	1	2	21.6																2				1
		ChAOS B13_4.13	2017-07-16 14:07:55	109	B13 4	74.4994	30.0032	358.99	1.77889	294.682	0.060217	35.0028	0.12	1	1	4	36			1						1											2
		ChAOS B13_4.14	2017-07-16 14:10:23	109	B13 4	74.4994	30.0031	358.72	1.77889	294.682	0.060217	35.0028	0.12	1	1	4	36																1
		ChAOS B13_4.15	2017-07-16 14:13:57	109	B13 4	74.4995	30.0029	358.71	1.77889	294.682	0.060217	35.0028	0.12	1	1	2	28.8																1
		ChAOS B13_4.16	2017-07-16 14:15:52	109	B13 4	74.4995	30.0027	358.76	1.77889	294.682	0.060217	35.0028	0.12	1	1	1	7.2																1
		ChAOS B13_4.17	2017-07-16 14:20:05	109	B13 4	74.4996	30.0025	358.97	1.77889	294.682	0.060217	35.0028	0.12	1	1	3	21.6									1							1
		ChAOS B13_4.18	2017-07-16 14:24:18	109	B13 4	74.4996	30.0024	358.94	1.77889	294.682	0.060217	35.0028	0.12	1	1	2	14.4																1
		ChAOS B13_5.01	2017-07-16 01:48:20	100	B13 5	74.5002	29.9992	358.52	1.77889	294.682	0.060217	35.0028	0.12	1	1	3	36																				3
		ChAOS B13_5.02	2017-07-16 01:50:09	100	B13 5	74.5002	29.9992	358.72	1.77889	294.682	0.060217	35.0028	0.12	1	1	3	21.6																															1
		ChAOS B13_5.03	2017-07-16 01:51:05	100	B13 5	74.5002	29.9991	359.03	1.77889	294.682	0.060217	35.0028	0.12	1	1	5	50.4															1					1											1
		ChAOS B13_5.04	2017-07-16 01:51:51	100	B13 5	74.4994	29.9966	359.9	1.77889	294.682	0.060217	35.0028	0.12	1	1	1	7.2
		ChAOS B13_5.05	2017-07-16 01:52:24	100	B13 5	74.4995	29.997	359.78	1.77889	294.682	0.060217	35.0028	0.12	1	1	3	28.8								1	1
		ChAOS B13_5.06	2017-07-16 01:53:25	100	B13 5	74.5001	29.9989	359	1.77889	294.682	0.060217	35.0028	0.12	1	1	2	21.6																2				1
		ChAOS B13_5.07	2017-07-16 01:54:31	100	B13 5	74.5	29.9988	359.15	1.77889	294.682	0.060217	35.0028	0.12	1	1	4	28.8																1									1
		ChAOS B13_5.08	2017-07-16 01:55:20	100	B13 5	74.5	29.9987	359.31	1.77889	294.682	0.060217	35.0028	0.12	1	1	3	21.6																1				1
		ChAOS B13_5.09	2017-07-16 01:55:46	100	B13 5	74.5	29.9987	359.01	1.77889	294.682	0.060217	35.0028	0.12	1	1	3	36																				2
		ChAOS B13_5.10	2017-07-16 01:57:55	100	B13 5	74.4998	29.9982	359.28	1.77889	294.682	0.060217	35.0028	0.12	1	1	3	43.2																1				4
		ChAOS B13_5.11	2017-07-16 01:59:58	100	B13 5	74.4998	29.9982	359.28	1.77889	294.682	0.060217	35.0028	0.12	1	1	5	57.6			1													1		2								3
		ChAOS B13_5.12	2017-07-16 02:04:50	100	B13 5	74.4997	29.9978	359.78	1.77889	294.682	0.060217	35.0028	0.12	1	1	5	43.2																1		2		1
		ChAOS B13_5.13	2017-07-16 02:06:59	100	B13 5	74.4997	29.9976	359.9	1.77889	294.682	0.060217	35.0028	0.12	1	1	3	21.6								1								1
		ChAOS B13_5.14	2017-07-16 02:08:27	100	B13 5	74.4996	29.9974	359.95	1.77889	294.682	0.060217	35.0028	0.12	1	1	3	21.6																1		1
		ChAOS B13_5.15	2017-07-16 02:09:38	100	B13 5	74.4996	29.9973	360.11	1.77889	294.682	0.060217	35.0028	0.12	1	1	2	14.4																1
		ChAOS B13_5.16	2017-07-16 02:11:12	100	B13 5	74.4995	29.9971	359.9	1.77889	294.682	0.060217	35.0028	0.12	1	1	5	43.2			1													1		2		1
		ChAOS B13_5.17	2017-07-16 02:12:34	100	B13 5	74.4995	29.997	359.78	1.77889	294.682	0.060217	35.0028	0.12	1	1	3	21.6									1							1
		ChAOS B13_5.18	2017-07-16 02:13:54	100	B13 5	74.4995	29.9969	359.93	1.77889	294.682	0.060217	35.0028	0.12	1	1	3	21.6			1													1				1
		ChAOS B13_5.19	2017-07-16 02:15:10	100	B13 5	74.4994	29.9968	359.91	1.77889	294.682	0.060217	35.0028	0.12	1	1	3	28.8																2		1													1
		ChAOS B13_5.20	2017-07-16 02:15:53	100	B13 5	74.4994	29.9966	359.9	1.77889	294.682	0.060217	35.0028	0.12	1	1	3	36																		1													1
		ChAOS B14_4.01	2017-07-30 01:47:59	291	B14 4	76.4989	30.5037	293.53	1.94986	276.581	0.036595	34.9993	0.1	1	1	2	21.6
		ChAOS B14_4.02	2017-07-30 01:53:18	291	B14 4	76.4989	30.5042	293.37	1.94986	276.581	0.036595	34.9993	0.1	1	1	3	21.6																1
		ChAOS B14_4.03	2017-07-30 01:55:10	291	B14 4	76.499	30.5043	293.48	1.94986	276.581	0.036595	34.9993	0.1	1	1	2	43.2																1
		ChAOS B14_4.04	2017-07-30 01:56:38	291	B14 4	76.499	30.5043	293.46	1.94986	276.581	0.036595	34.9993	0.1	1	1	3	43.2																2
		ChAOS B14_4.05	2017-07-30 01:58:17	291	B14 4	76.499	30.5043	293.3	1.94986	276.581	0.036595	34.9993	0.1	1	1	4	43.2									1							1
		ChAOS B14_4.06	2017-07-30 01:59:58	291	B14 4	76.4991	30.5041	293.42	1.94986	276.581	0.036595	34.9993	0.1	1	1	4	43.2																3				1
		ChAOS B14_4.07	2017-07-30 02:01:37	291	B14 4	76.4991	30.5042	293.64	1.94986	276.581	0.036595	34.9993	0.1	1	1	4	36									1																1
		ChAOS B14_4.08	2017-07-30 02:03:18	291	B14 4	76.4992	30.5042	293.25	1.94986	276.581	0.036595	34.9993	0.1	1	1	4	86.4																5																1
		ChAOS B14_4.09	2017-07-30 02:06:14	291	B14 4	76.4992	30.5042	293.58	1.94986	276.581	0.036595	34.9993	0.1	1	1	2	21.6																1
		ChAOS B14_4.10	2017-07-30 02:06:56	291	B14 4	76.4992	30.5044	293.26	1.94986	276.581	0.036595	34.9993	0.1	1	1	4	28.8																1									1
		ChAOS B14_4.11	2017-07-30 02:08:19	291	B14 4	76.4993	30.5043	293.24	1.94986	276.581	0.036595	34.9993	0.1	1	1	3	21.6																1									1
		ChAOS B14_4.12	2017-07-30 02:09:56	291	B14 4	76.4994	30.5044	293.44	1.94986	276.581	0.036595	34.9993	0.1	1	1	2	28.8									2
		ChAOS B14_4.13	2017-07-30 02:11:44	291	B14 4	76.4994	30.5045	293.29	1.94986	276.581	0.036595	34.9993	0.1	1	1	3	43.2																2
		ChAOS B14_4.14	2017-07-30 02:13:18	291	B14 4	76.4995	30.5044	293.4	1.94986	276.581	0.036595	34.9993	0.1	1	1	3	28.8									1
		ChAOS B14_4.15	2017-07-30 02:14:48	291	B14 4	76.4995	30.5043	293.29	1.94986	276.581	0.036595	34.9993	0.1	1	1	4	43.2																1									1
		ChAOS B14_4.16	2017-07-30 02:16:19	291	B14 4	76.4995	30.5043	293.25	1.94986	276.581	0.036595	34.9993	0.1	1	1	3	28.8									1							2										1
		ChAOS B14_4.17	2017-07-30 02:18:03	291	B14 4	76.4996	30.5045	293.26	1.94986	276.581	0.036595	34.9993	0.1	1	1	5	43.2									1							1									1
		ChAOS B14_4.18	2017-07-30 02:19:20	291	B14 4	76.4996	30.5044	293.28	1.94986	276.581	0.036595	34.9993	0.1	1	1	5	50.4																1										1
		ChAOS B14_4.19	2017-07-30 02:21:19	291	B14 4	76.4997	30.5043	293.35	1.94986	276.581	0.036595	34.9993	0.1	1	1	3	21.6																				1					1
		ChAOS B14_4.20	2017-07-30 02:23:06	291	B14 4	76.4998	30.5044	293.33	1.94986	276.581	0.036595	34.9993	0.1	1	1	4	28.8																1
		ChAOS B14_1.01	2017-07-30 03:20:36	291	B14 1	76.5008	30.5013	292.91	1.94986	276.581	0.036595	34.9993	0.1	1	1	3	28.8																1				1
		ChAOS B14_1.02	2017-07-30 03:18:55	291	B14 1	76.5008	30.5013	293.16	1.94986	276.581	0.036595	34.9993	0.1	1	1	4	57.6																3									1
		ChAOS B14_1.03	2017-07-30 03:17:20	291	B14 1	76.5007	30.5016	293.58	1.94986	276.581	0.036595	34.9993	0.1	1	1	4	28.8
		ChAOS B14_1.04	2017-07-30 03:16:01	291	B14 1	76.5008	30.5018	293.27	1.94986	276.581	0.036595	34.9993	0.1	1	1	2	36																3
		ChAOS B14_1.05	2017-07-30 03:14:27	291	B14 1	76.5008	30.502	293.05	1.94986	276.581	0.036595	34.9993	0.1	1	1	4	28.8																1									1			1
		ChAOS B14_1.06	2017-07-30 03:12:48	291	B14 1	76.5007	30.5021	293.14	1.94986	276.581	0.036595	34.9993	0.1	1	1	2	21.6																1
		ChAOS B14_1.07	2017-07-30 03:10:51	291	B14 1	76.4992	30.5014	293.24	1.94986	276.581	0.036595	34.9993	0.1	1	1	2	14.4
		ChAOS B14_1.08	2017-07-30 03:09:19	291	B14 1	76.5008	30.5024	293.01	1.94986	276.581	0.036595	34.9993	0.1	1	1	2	28.8																2
		ChAOS B14_1.09	2017-07-30 03:07:52	291	B14 1	76.5008	30.5025	292.96	1.94986	276.581	0.036595	34.9993	0.1	1	1	3	21.6																1
		ChAOS B14_1.10	2017-07-30 03:06:10	291	B14 1	76.5008	30.5027	293.55	1.94986	276.581	0.036595	34.9993	0.1	1	1	3	36																2
		ChAOS B14_1.11	2017-07-30 03:03:59	291	B14 1	76.5007	30.5029	293.15	1.94986	276.581	0.036595	34.9993	0.1	1	1	4	28.8									1							1										1
		ChAOS B14_1.12	2017-07-30 03:01:52	291	B14 1	76.5007	30.5031	293.26	1.94986	276.581	0.036595	34.9993	0.1	1	1	5	50.4			1			1																			1
		ChAOS B14_1.13	2017-07-30 02:54:27	291	B14 1	76.5007	30.5035	293.14	1.94986	276.581	0.036595	34.9993	0.1	1	1	4	28.8																1
		ChAOS B14_1.14	2017-07-30 02:51:48	291	B14 1	76.5007	30.5037	293.02	1.94986	276.581	0.036595	34.9993	0.1	1	1	3	43.2																3
		ChAOS B14_1.15	2017-07-30 02:50:01	291	B14 1	76.5007	30.5039	293.07	1.94986	276.581	0.036595	34.9993	0.1	1	1	3	28.8									1							2									1
		ChAOS B14_1.16	2017-07-30 02:48:16	291	B14 1	76.5007	30.5041	292.88	1.94986	276.581	0.036595	34.9993	0.1	1	1	1	14.4																2
		ChAOS B14_1.17	2017-07-30 02:46:24	291	B14 1	76.5007	30.5041	293.19	1.94986	276.581	0.036595	34.9993	0.1	1	1	4	43.2																1
		ChAOS B14_1.18	2017-07-30 02:44:26	291	B14 1	76.5007	30.5043	293.17	1.94986	276.581	0.036595	34.9993	0.1	1	1	2	14.4																				1
		ChAOS B14_1.19	2017-07-30 02:38:04	291	B14 1	76.5006	30.5042	293.04	1.94986	276.581	0.036595	34.9993	0.1	1	1	1	7.2																1
		ChAOS B14_2.01	2017-07-30 03:29:35	291	B14 2	76.5007	30.4987	292.85	1.94986	276.581	0.036595	34.9993	0.1	1	1	3	21.6																				1
		ChAOS B14_2.02	2017-07-30 03:37:04	291	B14 2	76.5007	30.4969	293.26	1.94986	276.581	0.036595	34.9993	0.1	1	1	4	43.2																1				1
		ChAOS B14_2.03	2017-07-30 03:38:49	291	B14 2	76.5007	30.4969	293.8	1.94986	276.581	0.036595	34.9993	0.1	1	1	2	14.4																1				1
		ChAOS B14_2.04	2017-07-30 03:40:46	291	B14 2	76.5007	30.4969	293.13	1.94986	276.581	0.036595	34.9993	0.1	1	1	3	43.2																1
		ChAOS B14_2.05	2017-07-30 03:42:25	291	B14 2	76.5006	30.497	293	1.94986	276.581	0.036595	34.9993	0.1	1	1	2	50.4																3
		ChAOS B14_2.06	2017-07-30 03:43:24	291	B14 2	76.5005	30.4969	293.18	1.94986	276.581	0.036595	34.9993	0.1	1	1	3	21.6																1				1
		ChAOS B14_2.07	2017-07-30 03:44:43	291	B14 2	76.5005	30.497	293.84	1.94986	276.581	0.036595	34.9993	0.1	1	1	2	14.4																1
		ChAOS B14_2.08	2017-07-30 03:46:53	291	B14 2	76.5005	30.4969	293.23	1.94986	276.581	0.036595	34.9993	0.1	1	1	2	28.8																2
		ChAOS B14_2.09	2017-07-30 03:48:39	291	B14 2	76.5004	30.4969	293.18	1.94986	276.581	0.036595	34.9993	0.1	1	1	3	36																3									1
		ChAOS B14_2.10	2017-07-30 03:50:49	291	B14 2	76.5004	30.4969	293.31	1.94986	276.581	0.036595	34.9993	0.1	1	1	4	43.2									1																			1
		ChAOS B14_2.11	2017-07-30 03:51:49	291	B14 2	76.5003	30.4968	293.18	1.94986	276.581	0.036595	34.9993	0.1	1	1	2	21.6																1
		ChAOS B14_2.12	2017-07-30 03:53:35	291	B14 2	76.5002	30.4968	292.96	1.94986	276.581	0.036595	34.9993	0.1	1	1	4	50.4									1							1
		ChAOS B14_2.13	2017-07-30 03:55:02	291	B14 2	76.5002	30.4969	293.26	1.94986	276.581	0.036595	34.9993	0.1	1	1	3	43.2																2
		ChAOS B14_2.14	2017-07-30 03:56:32	291	B14 2	76.5002	30.4968	293.14	1.94986	276.581	0.036595	34.9993	0.1	1	1	3	50.4																3
		ChAOS B14_2.15	2017-07-30 03:57:53	291	B14 2	76.5001	30.4968	293.15	1.94986	276.581	0.036595	34.9993	0.1	1	1	3	50.4																2									1
		ChAOS B14_2.16	2017-07-30 03:59:59	291	B14 2	76.5001	30.4967	293.41	1.94986	276.581	0.036595	34.9993	0.1	1	1	3	36																2
		ChAOS B14_2.17	2017-07-30 04:02:46	291	B14 2	76.5	30.4969	293.15	1.94986	276.581	0.036595	34.9993	0.1	1	1	5	57.6									1							3									1
		ChAOS B14_2.18	2017-07-30 04:05:10	291	B14 2	76.4999	30.4968	292.97	1.94986	276.581	0.036595	34.9993	0.1	1	1	2	14.4																1
		ChAOS B14_2.19	2017-07-30 04:09:15	291	B14 2	76.4999	30.4968	292.88	1.94986	276.581	0.036595	34.9993	0.1	1	1	2	21.6																2
		ChAOS B14_2.20	2017-07-30 04:11:20	291	B14 2	76.4999	30.4967	292.79	1.94986	276.581	0.036595	34.9993	0.1	1	1	3	28.8																2
		ChAOS B15_1.01	2017-07-18 22:41:12	142	B15 1	78.2508	30.0038	315.93	-1.48849	314.927	0.03342	34.8882	0.1	1	1	3	21.6		1																	1	1
		ChAOS B15_1.02	2017-07-18 22:45:07	142	B15 1	78.2509	30.0037	315.96	-1.48849	314.927	0.03342	34.8882	0.1	1	1	5	64.8															1	1				1												1
		ChAOS B15_1.03	2017-07-18 22:46:36	142	B15 1	78.2509	30.0036	315.94	-1.48849	314.927	0.03342	34.8882	0.1	1	1	5	57.6																		1
		ChAOS B15_1.04	2017-07-18 22:48:46	142	B15 1	78.2511	30.0035	316.05	-1.48849	314.927	0.03342	34.8882	0.1	1	1	4	43.2		1																								1
		ChAOS B15_1.05	2017-07-18 22:50:53	142	B15 1	78.2511	30.0036	315.88	-1.48849	314.927	0.03342	34.8882	0.1	1	1	5	64.8		1																		1
		ChAOS B15_1.06	2017-07-18 22:53:04	142	B15 1	78.2512	30.0034	315.94	-1.48849	314.927	0.03342	34.8882	0.1	1	1	4	28.8																										1
		ChAOS B15_1.07	2017-07-18 22:54:51	142	B15 1	78.2512	30.0034	315.99	-1.48849	314.927	0.03342	34.8882	0.1	1	1	3	36		1
		ChAOS B15_1.08	2017-07-18 22:55:37	142	B15 1	78.2513	30.0034	315.87	-1.48849	314.927	0.03342	34.8882	0.1	1	1	2	21.6																2
		ChAOS B15_1.09	2017-07-18 22:57:18	142	B15 1	78.2513	30.0033	315.79	-1.48849	314.927	0.03342	34.8882	0.1	1	1	3	21.6																1				1
		ChAOS B15_1.10	2017-07-18 22:59:10	142	B15 1	78.2514	30.0034	315.83	-1.48849	314.927	0.03342	34.8882	0.1	1	1	3	36																		1													1
		ChAOS B15_1.11	2017-07-18 23:00:51	142	B15 1	78.2514	30.0034	315.77	-1.48849	314.927	0.03342	34.8882	0.1	1	1	4	28.8																										1
		ChAOS B15_1.12	2017-07-18 23:02:19	142	B15 1	78.2515	30.0035	315.81	-1.48849	314.927	0.03342	34.8882	0.1	1	1	4	36																		1		2
		ChAOS B15_1.13	2017-07-18 23:03:52	142	B15 1	78.2515	30.0035	315.89	-1.48849	314.927	0.03342	34.8882	0.1	1	1	3	36																1
		ChAOS B15_1.14	2017-07-18 23:05:18	142	B15 1	78.2515	30.0035	316.11	-1.48849	314.927	0.03342	34.8882	0.1	1	1	2	14.4																1
		ChAOS B15_1.15	2017-07-18 23:06:35	142	B15 1	78.2516	30.0035	315.8	-1.48849	314.927	0.03342	34.8882	0.1	1	1	3	28.8
		ChAOS B15_1.16	2017-07-18 23:08:09	142	B15 1	78.2516	30.0035	315.91	-1.48849	314.927	0.03342	34.8882	0.1	1	1	4	28.8																															1
		ChAOS B15_1.17	2017-07-18 23:09:36	142	B15 1	78.2517	30.0035	315.82	-1.48849	314.927	0.03342	34.8882	0.1	1	1	2	14.4																1
		ChAOS B15_1.18	2017-07-18 23:11:28	142	B15 1	78.2517	30.0036	315.79	-1.48849	314.927	0.03342	34.8882	0.1	1	1	4	28.8		1														1										1
		ChAOS B15_1.19	2017-07-18 23:13:46	142	B15 1	78.2518	30.0036	315.83	-1.48849	314.927	0.03342	34.8882	0.1	1	1	5	43.2			1												1	1
		ChAOS B15_1.20	2017-07-18 23:15:47	142	B15 1	78.2518	30.0037	315.95	-1.48849	314.927	0.03342	34.8882	0.1	1	1	4	28.8																1
		ChAOS B15_2.01	2017-07-18 23:24:17	142	B15 10	78.2517	30.0036	316.83	-1.48849	314.927	0.03342	34.8882	0.1	1	1	3	43.2																1										1
		ChAOS B15_2.02	2017-07-18 23:34:17	142	B15 10	78.2517	30.0036	316.75	-1.48849	314.927	0.03342	34.8882	0.1	1	1	3	28.8																1										1
		ChAOS B15_2.03	2017-07-18 23:37:15	142	B15 10	78.2517	30.0037	316.58	-1.48849	314.927	0.03342	34.8882	0.1	1	1	6	72																2				1
		ChAOS B15_2.04	2017-07-18 23:38:39	142	B15 10	78.2517	30.0039	316.57	-1.48849	314.927	0.03342	34.8882	0.1	1	1	4	28.8		1														1
		ChAOS B15_2.05	2017-07-18 23:40:21	142	B15 10	78.2518	30.004	316.57	-1.48849	314.927	0.03342	34.8882	0.1	1	1	3	28.8																				1
		ChAOS B15_2.06	2017-07-18 23:41:42	142	B15 10	78.22	30.0045	316.66	-1.48849	314.927	0.03342	34.8882	0.1	1	1	4	28.8									1							1
		ChAOS B15_2.07	2017-07-18 23:45:36	142	B15 10	78.2525	30.005	316.25	-1.48849	314.927	0.03342	34.8882	0.1	1	1	2	21.6
		ChAOS B15_2.08	2017-07-18 23:47:06	142	B15 10	78.2526	30.0054	316.34	-1.48849	314.927	0.03342	34.8882	0.1	1	1	4	36		1																								1
		ChAOS B15_2.09	2017-07-18 23:49:06	142	B15 10	78.2526	30.0059	316.37	-1.48849	314.927	0.03342	34.8882	0.1	1	1	4	36																1				2						1
		ChAOS B15_2.10	2017-07-18 23:52:14	142	B15 10	78.2526	30.0061	316.34	-1.48849	314.927	0.03342	34.8882	0.1	1	1	3	21.6																										1
		ChAOS B15_2.11	2017-07-18 23:55:07	142	B15 10	78.2526	30.0063	316.28	-1.48849	314.927	0.03342	34.8882	0.1	1	1	3	21.6																1
		ChAOS B15_2.12	2017-07-18 23:56:22	142	B15 10	78.2526	30.0065	316.27	-1.48849	314.927	0.03342	34.8882	0.1	1	1	2	21.6
		ChAOS B15_2.13	2017-07-18 23:57:30	142	B15 10	78.2526	30.0067	316.34	-1.48849	314.927	0.03342	34.8882	0.1	1	1	3	36																2
		ChAOS B15_2.14	2017-07-18 23:58:39	142	B15 10	78.2526	30.0068	316.43	-1.48849	314.927	0.03342	34.8882	0.1	1	1	2	21.6																									1
		ChAOS B15_2.15	2017-07-18 23:59:55	142	B15 10	78.2526	30.0071	316.47	-1.48849	314.927	0.03342	34.8882	0.1	1	1	6	57.6						1													1						1	1
		ChAOS B15_2.16	2017-07-19 00:01:22	142	B15 10	78.2526	30.0073	316.38	-1.48849	314.927	0.03342	34.8882	0.1	1	1	4	43.2																1
		ChAOS B15_2.17	2017-07-19 00:02:48	142	B15 10	78.2526	30.0075	316.36	-1.48849	314.927	0.03342	34.8882	0.1	1	1	4	28.8																1									1
		ChAOS B15_2.18	2017-07-19 00:04:11	142	B15 10	78.2526	30.0077	316.33	-1.48849	314.927	0.03342	34.8882	0.1	1	1	4	57.6																2
		ChAOS B15_2.19	2017-07-19 00:06:29	142	B15 10	78.2526	30.0077	316.3	-1.48849	314.927	0.03342	34.8882	0.1	1	1	4	79.2																2
		ChAOS B15_2.20	2017-07-20 00:06:28	143	B15 11	78.2526	30.0092	316.4	-1.48849	314.927	0.03342	34.8882	0.1	1	1	4	36
		ChAOS B15_4.01	2017-07-19 01:22:03	143	B15 12	78.2508	30.0121	316.37	-1.48849	314.927	0.03342	34.8882	0.1	1	1	3	36																2				1
		ChAOS B15_4.02	2017-07-19 01:21:01	143	B15 12	78.2508	30.0119	316.39	-1.48849	314.927	0.03342	34.8882	0.1	1	1	3	21.6																		1
		ChAOS B15_4.03	2017-07-19 01:19:51	143	B15 12	78.2508	30.0118	316.57	-1.48849	314.927	0.03342	34.8882	0.1	1	1	3	21.6																1
		ChAOS B15_4.04	2017-07-19 01:15:52	143	B15 12	78.2508	30.0115	316.51	-1.48849	314.927	0.03342	34.8882	0.1	1	1	8	57.6																1		1							1	1
		ChAOS B15_4.05	2017-07-19 01:13:13	143	B15 12	78.2508	30.0112	316.57	-1.48849	314.927	0.03342	34.8882	0.1	1	1	5	50.4									1							1
		ChAOS B15_4.06	2017-07-19 01:11:39	143	B15 12	78.2508	30.011	316.49	-1.48849	314.927	0.03342	34.8882	0.1	1	1	4	50.4												1						1
		ChAOS B15_4.07	2017-07-19 01:10:04	143	B15 12	78.2508	30.0108	316.58	-1.48849	314.927	0.03342	34.8882	0.1	1	1	4	28.8
		ChAOS B15_4.08	2017-07-19 01:08:57	143	B15 12	78.2508	30.0107	316.53	-1.48849	314.927	0.03342	34.8882	0.1	1	1	4	36																				1
		ChAOS B15_4.09	2017-07-19 01:06:54	143	B15 12	78.2508	30.0103	316.5	-1.48849	314.927	0.03342	34.8882	0.1	1	1	1	14.4																2
		ChAOS B15_4.10	2017-07-19 01:05:24	143	B15 12	78.2508	30.0101	316.63	-1.48849	314.927	0.03342	34.8882	0.1	1	1	4	28.8																									1
		ChAOS B15_4.11	2017-07-19 01:03:37	143	B15 12	78.2508	30.0099	316.53	-1.48849	314.927	0.03342	34.8882	0.1	1	1	2	14.4																1															1
		ChAOS B15_4.12	2017-07-19 01:01:56	143	B15 12	78.2508	30.0097	316.28	-1.48849	314.927	0.03342	34.8882	0.1	1	1	5	57.6	1																								2
		ChAOS B15_4.13	2017-07-19 01:00:07	143	B15 12	78.2508	30.0095	316.19	-1.48849	314.927	0.03342	34.8882	0.1	1	1	2	21.6																1
		ChAOS B15_4.14	2017-07-19 00:58:39	143	B15 12	78.2508	30.0093	316.18	-1.48849	314.927	0.03342	34.8882	0.1	1	1	3	28.8																1										1
		ChAOS B15_4.15	2017-07-19 00:57:12	143	B15 12	78.2508	30.0091	316.09	-1.48849	314.927	0.03342	34.8882	0.1	1	1	5	57.6																									1	1
		ChAOS B15_4.16	2017-07-19 00:56:39	143	B15 12	78.2508	30.009	316.11	-1.48849	314.927	0.03342	34.8882	0.1	1	1	3	43.2																2
		ChAOS B15_4.17	2017-07-19 00:54:21	143	B15 12	78.2508	30.0088	316.04	-1.48849	314.927	0.03342	34.8882	0.1	1	1	3	28.8																												1
		ChAOS B15_4.18	2017-07-19 00:50:24	143	B15 12	78.2508	30.0085	316.01	-1.48849	314.927	0.03342	34.8882	0.1	1	1	6	50.4																1												1
		ChAOS B15_4.19	2017-07-19 00:47:00	143	B15 12	78.2508	30.0083	315.88	-1.48849	314.927	0.03342	34.8882	0.1	1	1	4	43.2	1															1
		ChAOS B15_4.20	2017-07-19 00:42:36	143	B15 12	78.2508	30.0082	315.89	-1.48849	314.927	0.03342	34.8882	0.1	1	1	3	36
		ChAOS B15_5.01	2017-07-19 01:36:05	143	B15 11	78.2515	30.0125	316.63	-1.48849	314.927	0.03342	34.8882	0.1	1	1	5	36																1								1				1
		ChAOS B15_5.02	2017-07-19 01:39:53	143	B15 11	78.2517	30.0127	316.37	-1.48849	314.927	0.03342	34.8882	0.1	1	1	4	28.8																1
		ChAOS B15_5.03	2017-07-19 01:41:11	143	B15 11	78.2517	30.0127	316.4	-1.48849	314.927	0.03342	34.8882	0.1	1	1	3	36																1
		ChAOS B15_5.04	2017-07-19 01:42:40	143	B15 11	78.2518	30.0127	316.34	-1.48849	314.927	0.03342	34.8882	0.1	1	1	3	36																									1
		ChAOS B15_5.05	2017-07-19 01:43:35	143	B15 11	78.2518	30.0127	316.38	-1.48849	314.927	0.03342	34.8882	0.1	1	1	3	43.2																2												1
		ChAOS B15_5.06	2017-07-19 01:45:40	143	B15 11	78.2519	30.0126	316.2	-1.48849	314.927	0.03342	34.8882	0.1	1	1	2	28.8
		ChAOS B15_5.07	2017-07-19 01:47:19	143	B15 11	78.2519	30.0126	316.21	-1.48849	314.927	0.03342	34.8882	0.1	1	1	3	43.2																1
		ChAOS B15_5.08	2017-07-19 01:48:40	143	B15 11	78.252	30.0126	316.14	-1.48849	314.927	0.03342	34.8882	0.1	1	1	2	14.4	1
		ChAOS B15_5.09	2017-07-19 01:50:48	143	B15 11	78.252	30.0126	316.13	-1.48849	314.927	0.03342	34.8882	0.1	1	1	3	21.6		1														1
		ChAOS B15_5.10	2017-07-19 01:52:05	143	B15 11	78.2521	30.0126	316.17	-1.48849	314.927	0.03342	34.8882	0.1	1	1	4	43.2																												1
		ChAOS B15_5.11	2017-07-19 01:53:31	143	B15 11	78.2521	30.0125	316.13	-1.48849	314.927	0.03342	34.8882	0.1	1	1	5	50.4								1								1			1
		ChAOS B15_5.12	2017-07-19 01:55:05	143	B15 11	78.2522	30.0125	316.28	-1.48849	314.927	0.03342	34.8882	0.1	1	1	3	28.8									1																							1
		ChAOS B15_5.13	2017-07-19 01:56:47	143	B15 11	78.2523	30.0125	316.16	-1.48849	314.927	0.03342	34.8882	0.1	1	1	3	28.8																1
		ChAOS B15_5.14	2017-07-19 01:58:13	143	B15 11	78.2523	30.0125	316.29	-1.48849	314.927	0.03342	34.8882	0.1	1	1	3	28.8																									1
		ChAOS B15_5.15	2017-07-19 01:59:46	143	B15 11	78.2523	30.0125	316.14	-1.48849	314.927	0.03342	34.8882	0.1	1	1	2	21.6																1
		ChAOS B15_5.16	2017-07-19 02:01:33	143	B15 11	78.2524	30.0124	316.26	-1.48849	314.927	0.03342	34.8882	0.1	1	1	4	28.8												1																1			1
		ChAOS B15_5.17	2017-07-19 02:02:34	143	B15 11	78.2524	30.0124	316.34	-1.48849	314.927	0.03342	34.8882	0.1	1	1	3	21.6																				1						1
		ChAOS B15_5.18	2017-07-19 02:03:25	143	B15 11	78.2524	30.0124	316.46	-1.48849	314.927	0.03342	34.8882	0.1	1	1	3	21.6								1												1
		ChAOS B15_5.19	2017-07-19 02:04:38	143	B15 11	78.2525	30.0125	316.29	-1.48849	314.927	0.03342	34.8882	0.1	1	1	5	43.2	1																											1
		ChAOS B15_5.20	2017-07-19 02:06:02	143	B15 11	78.2525	30.0124	316.18	-1.48849	314.927	0.03342	34.8882	0.1	1	1	4	43.2									1																							1
		ChAOS B16_1.01	2017-07-21 20:19:58	180	B16 1	80.1155	30.0259	287.1	-1.43646	319.998	0.018386	34.6701	0.25	1	1	8	309.6			1					1	2							28									1			1
		ChAOS B16_1.02	2017-07-21 20:21:32	180	B16 1	80.1157	30.0257	287.32	-1.43646	319.998	0.018386	34.6701	0.25	1	1	5	273.6																18									3							1
		ChAOS B16_1.03	2017-07-21 20:22:35	180	B16 1	80.1157	30.0258	287.49	-1.43646	319.998	0.018386	34.6701	0.25	1	1	4	237.6									1							20
		ChAOS B16_1.04	2017-07-21 20:23:13	180	B16 1	80.1158	30.0258	287.52	-1.43646	319.998	0.018386	34.6701	0.25	1	1	4	230.4																21									3
		ChAOS B16_1.05	2017-07-21 20:24:49	180	B16 1	80.1158	30.0257	287.62	-1.43646	319.998	0.018386	34.6701	0.25	1	1	3	230.4																15									1
		ChAOS B16_1.06	2017-07-21 20:25:25	180	B16 1	80.1159	30.0257	287.58	-1.43646	319.998	0.018386	34.6701	0.25	1	1	5	151.2	1							1								9									3
		ChAOS B16_1.07	2017-07-21 20:26:23	180	B16 1	80.1159	30.0257	287.57	-1.43646	319.998	0.018386	34.6701	0.25	1	1	7	295.2									2							17									2	1		2
		ChAOS B16_1.08	2017-07-21 20:27:27	180	B16 1	80.116	30.0258	287.55	-1.43646	319.998	0.018386	34.6701	0.25	1	1	4	223.2																12									2			1
		ChAOS B16_1.09	2017-07-21 20:28:26	180	B16 1	80.1161	30.0259	287.35	-1.43646	319.998	0.018386	34.6701	0.25	1	1	5	201.6															1	14									3
		ChAOS B16_1.10	2017-07-21 20:29:26	180	B16 1	80.1162	30.026	287.42	-1.43646	319.998	0.018386	34.6701	0.25	1	1	6	252	1															13									4						1
		ChAOS B16_1.11	2017-07-21 20:30:31	180	B16 1	80.1164	30.0262	287.35	-1.43646	319.998	0.018386	34.6701	0.25	1	1	7	187.2									1							8		1										1			1
		ChAOS B16_1.12	2017-07-21 20:31:31	180	B16 1	80.1165	30.0264	287.44	-1.43646	319.998	0.018386	34.6701	0.25	1	1	4	172.8									1							9									4
		ChAOS B16_1.13	2017-07-21 20:32:28	180	B16 1	80.1165	30.0267	287.3	-1.43646	319.998	0.018386	34.6701	0.25	1	1	5	223.2									1			1				15									1
		ChAOS B16_1.14	2017-07-21 20:33:26	180	B16 1	80.1166	30.0269	287.26	-1.43646	319.998	0.018386	34.6701	0.25	1	1	5	144	1							1	1																			3
		ChAOS B16_1.15	2017-07-21 20:34:28	180	B16 1	80.1166	30.0272	287.16	-1.43646	319.998	0.018386	34.6701	0.25	1	1	5	194.4																10				1					1	1
		ChAOS B16_1.16	2017-07-21 20:35:29	180	B16 1	80.1167	30.0273	287.01	-1.43646	319.998	0.018386	34.6701	0.25	1	1	6	194.4																9									1	1
		ChAOS B16_1.17	2017-07-21 20:36:32	180	B16 1	80.1167	30.0275	286.93	-1.43646	319.998	0.018386	34.6701	0.25	1	1	7	194.4																7				1					2							1
		ChAOS B16_1.18	2017-07-21 20:37:31	180	B16 1	80.1168	30.0276	286.72	-1.43646	319.998	0.018386	34.6701	0.25	1	1	2	100.8	1
		ChAOS B16_1.19	2017-07-21 20:38:28	180	B16 1	80.1169	30.0279	286.42	-1.43646	319.998	0.018386	34.6701	0.25	1	1	7	216		1	1					1								11									1			4
		ChAOS B16_1.20	2017-07-21 20:39:27	180	B16 1	80.117	30.0281	286.11	-1.43646	319.998	0.018386	34.6701	0.25	1	1	3	165.6																5									4
		ChAOS B16_2.01	2017-07-21 17:16:31	179	B16 2	80.114	29.9344	310.05	-1.43646	319.998	0.018386	34.6701	0.25	1	1	6	100.8	1								1							4
		ChAOS B16_2.02	2017-07-21 17:25:50	179	B16 2	80.1141	29.9345	309.66	-1.43646	319.998	0.018386	34.6701	0.25	1	1	4	50.4																3									1
		ChAOS B16_2.03	2017-07-21 17:27:15	179	B16 2	80.1141	29.9346	309.5	-1.43646	319.998	0.018386	34.6701	0.25	1	1	3	57.6	1															6									1
		ChAOS B16_2.04	2017-07-21 17:31:11	179	B16 2	80.1141	29.9345	309.18	-1.43646	319.998	0.018386	34.6701	0.25	1	1	3	28.8	1																								1
		ChAOS B16_2.05	2017-07-21 17:32:18	179	B16 2	80.1142	29.9346	308.97	-1.43646	319.998	0.018386	34.6701	0.25	1	1	5	86.4																3									4
		ChAOS B16_2.06	2017-07-21 17:34:56	179	B16 2	80.1142	29.9346	308.84	-1.43646	319.998	0.018386	34.6701	0.25	1	1	4	43.2																2									2
		ChAOS B16_2.07	2017-07-21 17:39:10	179	B16 2	80.1143	29.9346	308.94	-1.43646	319.998	0.018386	34.6701	0.25	1	1	6	108			1					3																	2			2				1
		ChAOS B16_2.08	2017-07-21 17:40:10	179	B16 2	80.1143	29.9346	308.89	-1.43646	319.998	0.018386	34.6701	0.25	1	1	6	86.4			1						1							4									1
		ChAOS B16_2.09	2017-07-21 17:42:34	179	B16 2	80.1143	29.9343	308.76	-1.43646	319.998	0.018386	34.6701	0.25	1	1	4	79.2																3									3
		ChAOS B16_2.10	2017-07-21 17:46:19	179	B16 2	80.1143	29.9342	308.83	-1.43646	319.998	0.018386	34.6701	0.25	1	1	4	72									1							2									4
		ChAOS B16_2.11	2017-07-21 17:47:47	179	B16 2	80.1144	29.9341	308.76	-1.43646	319.998	0.018386	34.6701	0.25	1	1	4	43.2	1																								1
		ChAOS B16_2.12	2017-07-21 17:49:44	179	B16 2	80.1144	29.9339	308.97	-1.43646	319.998	0.018386	34.6701	0.25	1	1	4	57.6								1								2									4
		ChAOS B16_2.13	2017-07-21 17:51:39	179	B16 2	80.1144	29.9337	309.1	-1.43646	319.998	0.018386	34.6701	0.25	1	1	5	72																5		1							2
		ChAOS B16_2.14	2017-07-21 17:55:31	179	B16 2	80.1145	29.9333	309.61	-1.43646	319.998	0.018386	34.6701	0.25	1	1	4	86.4																									4
		ChAOS B16_2.15	2017-07-21 17:56:02	179	B16 2	80.1145	29.9333	309.61	-1.43646	319.998	0.018386	34.6701	0.25	1	1	5	57.6								1								2									2
		ChAOS B16_2.16	2017-07-21 17:57:56	179	B16 2	80.1145	29.9331	309.88	-1.43646	319.998	0.018386	34.6701	0.25	1	1	5	43.2									1																1			1
		ChAOS B16_2.17	2017-07-21 17:59:42	179	B16 2	80.1145	29.9329	310.36	-1.43646	319.998	0.018386	34.6701	0.25	1	1	4	50.4									1							2									1
		ChAOS B16_2.18	2017-07-21 18:01:39	179	B16 2	80.1145	29.9326	310.6	-1.43646	319.998	0.018386	34.6701	0.25	1	1	4	64.8									3							4									1
		ChAOS B16_2.19	2017-07-21 18:04:12	179	B16 2	80.1145	29.9326	310.6	-1.43646	319.998	0.018386	34.6701	0.25	1	1	5	50.4																3									1						1
		ChAOS B16_2.20	2017-07-21 18:06:05	179	B16 2	80.1146	29.9322	310.82	-1.43646	319.998	0.018386	34.6701	0.25	1	1	5	79.2																5									1	1
		ChAOS B16_5.01	2017-07-21 15:40:06	178	B16 5	80.0938	29.9338	307.76	-1.43646	319.998	0.018386	34.6701	0.25	1	1	6	64.8																1									1	1
		ChAOS B16_5.02	2017-07-21 15:41:35	178	B16 5	80.0938	29.9356	307.77	-1.43646	319.998	0.018386	34.6701	0.25	1	1	4	43.2	1								1																2
		ChAOS B16_5.03	2017-07-21 15:43:10	178	B16 5	80.0938	29.9335	308.6	-1.43646	319.998	0.018386	34.6701	0.25	1	1	6	129.6	1							1								8									4			1
		ChAOS B16_5.04	2017-07-21 15:45:45	178	B16 5	80.0939	29.9331	308.45	-1.43646	319.998	0.018386	34.6701	0.25	1	1	4	64.8																3		1
		ChAOS B16_5.05	2017-07-21 15:48:07	178	B16 5	80.0939	29.9328	308.7	-1.43646	319.998	0.018386	34.6701	0.25	1	1	4	93.6																2									3
		ChAOS B16_5.06	2017-07-21 15:49:38	178	B16 5	80.0939	29.9326	308.76	-1.43646	319.998	0.018386	34.6701	0.25	1	1	4	79.2																									3			1
		ChAOS B16_5.07	2017-07-21 15:51:21	178	B16 5	80.0939	29.9323	308.64	-1.43646	319.998	0.018386	34.6701	0.25	1	1	4	64.8																									2
		ChAOS B16_5.08	2017-07-21 15:52:57	178	B16 5	80.0939	29.9321	308.53	-1.43646	319.998	0.018386	34.6701	0.25	1	1	6	93.6																									3			1
		ChAOS B16_5.09	2017-07-21 15:55:28	178	B16 5	80.0939	29.932	308.42	-1.43646	319.998	0.018386	34.6701	0.25	1	1	5	86.4	1																								2			2
		ChAOS B17_1.01	2017-07-24 11:15:54	219	B17 1	81.3225	29.2417	307.75	1.76366	293.352	0.0201	34.8911	0.4	1	1	7	79.2	1								2							1										1		4
		ChAOS B17_1.02	2017-07-24 11:19:07	219	B17 1	81.3293	29.1672	299.37	1.76366	293.352	0.0201	34.8911	0.4	1	1	7	108	1							1	3																	2		6
		ChAOS B17_1.03	2017-07-25 11:20:50	220	B17 2	81.3301	29.1593	299.37	1.76366	293.352	0.0201	34.8911	0.4	1	1	6	79.2									2							1										1		5
		ChAOS B17_2.01	2017-07-24 11:46:49	220	B17 2	81.3171	29.2704	313.81	1.76366	293.352	0.0201	34.8911	0.4	1	1	5	100.8								1								2												9
		ChAOS B17_2.02	2017-07-24 11:48:48	220	B17 2	81.317	29.2703	313.86	1.76366	293.352	0.0201	34.8911	0.4	18	1	12	237.6	4		2		2	1		8	3							1										2		4	1
		ChAOS B17_2.03	2017-07-24 11:49:09	220	B17 2	81.317	29.2704	313.79	1.76366	293.352	0.0201	34.8911	0.4	1	1	2	36																3												2
		ChAOS B17_2.04	2017-07-24 11:51:16	220	B17 2	81.3169	29.2706	313.93	1.76366	293.352	0.0201	34.8911	0.4	1	1	4	57.6	2							1								3
		ChAOS B17_2.05	2017-07-24 11:52:14	220	B17 2	81.3168	29.2708	314.21	1.76366	293.352	0.0201	34.8911	0.4	1	1	5	93.6								6										1										3
		ChAOS B17_2.06	2017-07-24 11:53:09	220	B17 2	81.3167	29.2711	314.24	1.76366	293.352	0.0201	34.8911	0.4	1	1	3	36																										1		3
		ChAOS B17_2.07	2017-07-24 11:54:12	220	B17 2	81.3166	29.2713	314.19	1.76366	293.352	0.0201	34.8911	0.4	1	1	4	50.4																2										1		3
		ChAOS B17_2.08	2017-07-24 11:55:27	220	B17 2	81.3166	29.2712	314.17	1.76366	293.352	0.0201	34.8911	0.4	1	1	5	93.6	2							4																				4
		ChAOS B17_2.09	2017-07-24 11:56:13	220	B17 2	81.3166	29.2712	314.2	1.76366	293.352	0.0201	34.8911	0.4	1	1	5	36								1								1
		ChAOS B17_2.10	2017-07-24 11:57:02	220	B17 2	81.3166	29.2712	314.34	1.76366	293.352	0.0201	34.8911	0.4	1	1	5	57.6	1							1								1												3
		ChAOS B17_3.01	2017-07-24 12:18:02	221	B17 3	81.3102	29.3051	317.81	1.76366	293.352	0.0201	34.8911	0.4	15	2	8	115.2	1				1			2								2		7								1
		ChAOS B17_3.02	2017-07-24 12:18:31	221	B17 3	81.3101	29.3051	316.76	1.76366	293.352	0.0201	34.8911	0.4	1	1	5	57.6	2															1				1						3		1
		ChAOS B17_3.03	2017-07-24 12:19:27	221	B17 3	81.3101	29.3052	316.75	1.76366	293.352	0.0201	34.8911	0.4	1	1	5	72								1	1							3												4
		ChAOS B17_3.04	2017-07-24 12:20:25	221	B17 3	81.31	29.3053	316.97	1.76366	293.352	0.0201	34.8911	0.4	1	1	7	64.8								1								1		1								2
		ChAOS B17_3.05	2017-07-24 12:20:52	221	B17 3	81.3099	29.3053	317.12	1.76366	293.352	0.0201	34.8911	0.4	1	1	5	86.4	1															5												4
		ChAOS B17_3.06	2017-07-24 12:21:54	221	B17 3	81.3098	29.3054	316.93	1.76366	293.352	0.0201	34.8911	0.4	185	2	11	194.4	1	3	2					9	1							3												3	2
		ChAOS B17_3.07	2017-07-24 12:22:46	221	B17 3	81.3098	29.3056	316.84	1.76366	293.352	0.0201	34.8911	0.4	15	1	5	64.8								2	1							1												3
		ChAOS B17_3.08	2017-07-24 12:23:13	221	B17 3	81.3097	29.3056	316.92	1.76366	293.352	0.0201	34.8911	0.4	1	1	4	64.8								1										3										4
		ChAOS B17_3.09	2017-07-24 12:24:05	221	B17 3	81.3097	29.3057	317.1	1.76366	293.352	0.0201	34.8911	0.4	1	1	4	28.8																1												1
		ChAOS B17_3.10	2017-07-24 12:24:42	221	B17 3	81.3096	29.3057	318.43	1.76366	293.352	0.0201	34.8911	0.4	1	1	4	180	1																	22								1
		ChAOS B17_3.11	2017-07-24 12:25:50	221	B17 3	81.3095	29.3058	317.96	1.76366	293.352	0.0201	34.8911	0.4	15	2	9	122.4		5			1			3			1														1			2
		ChAOS B17_3.12	2017-07-24 12:26:46	221	B17 3	81.3094	29.306	318.21	1.76366	293.352	0.0201	34.8911	0.4	1	1	6	57.6																1												2
		ChAOS B17_3.13	2017-07-24 12:27:28	221	B17 3	81.3094	29.306	318.56	1.76366	293.352	0.0201	34.8911	0.4	1	1	5	50.4								1										1								1		3
		ChAOS B17_3.14	2017-07-24 12:28:56	221	B17 3	81.3093	29.3061	318.38	1.76366	293.352	0.0201	34.8911	0.4	1	1	3	21.6								1																1				1
		ChAOS B17_3.15	2017-07-24 12:29:46	221	B17 3	81.3092	29.3061	318.05	1.76366	293.352	0.0201	34.8911	0.4	1	1	2	28.8								2																				2
		ChAOS B17_3.16	2017-07-24 12:30:44	221	B17 3	81.3091	29.3062	318.97	1.76366	293.352	0.0201	34.8911	0.4	185	3	9	230.4		6						3	1							1				1								2	15
		ChAOS B17_3.17	2017-07-24 12:31:03	221	B17 3	81.3091	29.3062	317.73	1.76366	293.352	0.0201	34.8911	0.4	1	1	4	57.6	1																									1		3
		ChAOS B17_3.18	2017-07-24 12:32:16	221	B17 3	81.309	29.3064	317.92	1.76366	293.352	0.0201	34.8911	0.4	1	1	5	72								1								4										1		3
		ChAOS B17_3.19	2017-07-24 12:33:34	221	B17 3	81.3089	29.3065	318.33	1.76366	293.352	0.0201	34.8911	0.4	1	1	5	79.2	1							1								1		3										5
		ChAOS B17_3.20	2017-07-24 12:34:17	221	B17 3	81.3088	29.3066	318.29	1.76366	293.352	0.0201	34.8911	0.4	185	2	6	129.6		3						1		1						4													4
		ChAOS B17_4.01	2017-07-24 12:56:23	222	B17 4	81.3022	29.3311	325.45	1.76366	293.352	0.0201	34.8911	0.4	1	1	5	93.6								2								1												3
		ChAOS B17_4.02	2017-07-24 12:57:39	222	B17 4	81.3021	29.3313	324.83	1.76366	293.352	0.0201	34.8911	0.4	1	1	8	57.6	1							1	1							1		1							1	1
		ChAOS B17_4.03	2017-07-24 12:58:05	222	B17 4	81.302	29.3314	324.86	1.76366	293.352	0.0201	34.8911	0.4	1	1	4	180																2		14										5
		ChAOS B17_4.04	2017-07-24 12:58:57	222	B17 4	81.302	29.3315	325.05	1.76366	293.352	0.0201	34.8911	0.4	1	1	3	72																1		6										3
		ChAOS B17_4.05	2017-07-24 12:59:42	222	B17 4	81.3019	29.3316	324.9	1.76366	293.352	0.0201	34.8911	0.4	14	1	6	108	3															1												3
		ChAOS B17_4.06	2017-07-24 13:00:56	222	B17 4	81.3018	29.3317	324.59	1.76366	293.352	0.0201	34.8911	0.4	1	1	4	100.8								2	4									6										2
		ChAOS B17_4.07	2017-07-24 13:01:30	222	B17 4	81.3018	29.3317	324.46	1.76366	293.352	0.0201	34.8911	0.4	1	1	5	43.2																1	1	2										1
		ChAOS B17_4.08	2017-07-24 13:02:47	222	B17 4	81.3017	29.3312	324.11	1.76366	293.352	0.0201	34.8911	0.4	1	1	4	57.6	1															2		3										2
		ChAOS B17_4.09	2017-07-24 13:03:37	222	B17 4	81.3016	29.3309	323.96	1.76366	293.352	0.0201	34.8911	0.4	1	1	4	72																		3								4		1
		ChAOS B17_4.10	2017-07-24 13:04:06	222	B17 4	81.3016	29.3307	323.88	1.76366	293.352	0.0201	34.8911	0.4	1	1	4	28.8	1															1		1										1
		ChAOS B17_4.11	2017-07-24 13:05:06	222	B17 4	81.3016	29.3303	324.02	1.76366	293.352	0.0201	34.8911	0.4	1	1	3	43.2																3												1
		ChAOS B17_4.12	2017-07-24 13:06:00	222	B17 4	81.3015	29.3299	323.85	1.76366	293.352	0.0201	34.8911	0.4	1	1	4	57.6								2	2																			3
		ChAOS B17_4.13	2017-07-24 13:06:49	222	B17 4	81.3015	29.3295	323.88	1.76366	293.352	0.0201	34.8911	0.4	1	1	3	28.8																1		2										1
		ChAOS B17_4.14	2017-07-24 13:07:45	222	B17 4	81.3014	29.3291	323.99	1.76366	293.352	0.0201	34.8911	0.4	1	1	5	64.8															1	2		3										2
		ChAOS B17_4.15	2017-07-24 13:08:55	222	B17 4	81.3014	29.3287	323.95	1.76366	293.352	0.0201	34.8911	0.4	1	1	6	64.8								1								2												1
		ChAOS B17_4.16	2017-07-24 13:10:09	222	B17 4	81.3013	29.3282	324.23	1.76366	293.352	0.0201	34.8911	0.4	1	1	4	43.2																		1		1						2		2
		ChAOS B17_4.17	2017-07-24 13:11:20	222	B17 4	81.3012	29.3277	324.7	1.76366	293.352	0.0201	34.8911	0.4	1	1	3	43.2								4																				1
		ChAOS B17_4.18	2017-07-24 13:11:47	222	B17 4	81.3012	29.3276	324.54	1.76366	293.352	0.0201	34.8911	0.4	1	1	6	64.8								1	1							1												2
		ChAOS B17_4.19	2017-07-24 13:13:16	222	B17 4	81.3011	29.3273	324.58	1.76366	293.352	0.0201	34.8911	0.4	15	1	5	64.8	2							2	1																			3
		ChAOS B17_4.20	2017-07-24 13:13:28	222	B17 4	81.3011	29.3273	324.59	1.76366	293.352	0.0201	34.8911	0.4	1	1	4	43.2								1								1		2										2
[truncated: 43 more columns]

## Sheet: carbon content
					individuals per image
	Functional group key	Image ID	Location		Polychaete annelids	gymnolaemate bryozoan	stenolaemate bryozoan	balanomorph barnacle crustaceans	colonial ascidian, chordates	solitary ascidian, chordates	priapulans	demospongiae, poiferans	errect gymnolaemate bryozoans	articulate brachiopod	crinoid echinoderm	basket star, echinoderms	suspension feeding malacostraca, crustacea	ophiuroid echinoderm	holothuroid echinoderm	deposit feeding polychaetes	sipunculans	echiurans	scaphopod molluscs	bivalve molluscs	burrowing echinoid, echinoderms	polyplacophora mollusc	gastropod mollusc	regular echinoid echinoderm	soft coral anthozoan cnidarians	actinaria anthozoan cnidarian	Seapen, anthozoan cnidarians	hydroid cnidarians	scleractinaria anthozoa cnidarian	Octocoral	errant polychaetes	nemerteans	turbellarian platyhelminthes	octopus, molluscs	asteroid echinoderm	predatory gastropod molluscs	Pisces, Chordata	pycnogonid chelicerate	Isopod, Malacostraca, Crustacea	spider crab, malacostraca crustacean	hermit crab malacostraca Crustacea	shrimp malacostracan Crustacea	crab/lobster malacostraca crustacean	generalist ophiuroids
SP	Pioneer suspension feeders	ChAOS B3_2.02	B3 2				3						1																1			3														1
SC	Climax suspension feeders	ChAOS B3_2.03	B3 2		2		1					2	1									1										3
SS	Sedentary suspension feeders	ChAOS B3_2.04	B3 2		1		1					1	2	1																		3
SM	Sessile suspension feeders	ChAOS B3_2.05	B3 2										7																			3
DC	Deposit feeding crawlers	ChAOS B3_2.06	B3 2									5	4																			2																2
DV	Deposit feeding worms	ChAOS B3_2.07	B3 2				1					1	3
DS	Shelled deposit feeders	ChAOS B3_2.08	B3 2		1							2	2																			2
GC	Grazers	ChAOS B3_2.09	B3 2		1	2	5					1	2																	1		2
PS	Sessile soft bodied predators	ChAOS B3_2.10	B3 2		1								2												1							5
PC	Mobile soft bodied predators	ChAOS B3_2.11	B3 2				1					2	4																			5
PM	Sessile hard bodied predators	ChAOS B3_2.12	B3 2									1	4									2										3
PL	Mobile hard bodied predators	ChAOS B3_2.13	B3 2										2																			4
PA	Arthropod predators	ChAOS B3_2.14	B3 2		3							1	2																			3
Mixed	Flexible strategy (more than one of the above)	ChAOS B3_2.15	B3 2		2								4																			2
		ChAOS B3_2.16	B3 2										8																			2
		ChAOS B3_2.17	B3 2		1							1	6									1										1
		ChAOS B3_2.18	B3 2										4																			4
		ChAOS B3_2.19	B3 2									1																				2
		ChAOS B3_2.20	B3 2									2	6
		ChAOS B3_5.01	B3 5										3																			2														1
		ChAOS B3_5.02	B3 5										2																			2
		ChAOS B3_5.03	B3 5									1	1																			2
		ChAOS B3_5.04	B3 5										3									2																	1
		ChAOS B3_5.05	B3 5		1								1									2
		ChAOS B3_5.06	B3 5		2								3									1										1														1
		ChAOS B3_5.07	B3 5									1	2
		ChAOS B3_5.08	B3 5		1																	1
		ChAOS B3_5.09	B3 5										6									1
		ChAOS B3_5.10	B3 5										3																																	1
		ChAOS B3_5.11	B3 5		1								2
		ChAOS B3_5.12	B3 5		1																											1
		ChAOS B3_5.13	B3 5										6												1
		ChAOS B3_5.14	B3 5										3																			1																1
		ChAOS B3_5.15	B3 5									1	2									1										1
		ChAOS B3_5.16	B3 5										2																			1
		ChAOS B3_5.17	B3 5		1								2																			1
		ChAOS B3_5.18	B3 5										4																			1
		ChAOS B3_5.19	B3 5										2																			2														1
		ChAOS B3_5.20	B3 5									1	5
		ChAOS B3_4.01	B3 4										3
		ChAOS B3_4.02	B3 4										4										1
		ChAOS B3_4.03	B3 4										10
		ChAOS B3_4.04	B3 4										4
		ChAOS B3_4.05	B3 4									1	3																			1
		ChAOS B3_4.06	B3 4				1					1	3
		ChAOS B3_4.07	B3 4									1	3																																			1
		ChAOS B3_4.08	B3 4										3
		ChAOS B3_4.09	B3 4				1					1	2	2																		2
		ChAOS B3_4.10	B3 4				3					3	2																			3
		ChAOS B3_4.11	B3 4										3
		ChAOS B3_4.12	B3 4									1	2																			1
		ChAOS B3_4.13	B3 4										3																			4
		ChAOS B3_4.14	B3 4				1						4																			3
		ChAOS B3_4.15	B3 4									2	5																			2
		ChAOS B3_4.16	B3 4									1	6																			3
		ChAOS B3_4.17	B3 4										7											2								3
		ChAOS B3_4.18	B3 4										5																			2
		ChAOS B3_4.19	B3 4																													2														1
		ChAOS B3_4.20	B3 4										3																			3
		ChAOS B3_1.01	B3 1									1	8																			1
		ChAOS B3_1.02	B3 1		2	3			1			4	2	1																		2																2
		ChAOS B3_1.03	B3 1										9
		ChAOS B3_1.04	B3 1									2	6												1							2
		ChAOS B3_1.05	B3 1										6																			1
		ChAOS B3_1.06	B3 1										5																			1														1
		ChAOS B3_1.07	B3 1				1					3	2
		ChAOS B3_1.08	B3 1										2																											2
		ChAOS B3_1.09	B3 1		1								2																			1
		ChAOS B3_1.10	B3 1				1					1	1																										1
		ChAOS B3_1.11	B3 1			5						2	1																	1
		ChAOS B3_1.12	B3 1										1																			2
		ChAOS B3_1.13	B3 1				1						3																			1									1
		ChAOS B3_1.14	B3 1										1																			1
		ChAOS B3_1.15	B3 1				1						5																			3
		ChAOS B3_1.16	B3 1										6												1							1
		ChAOS B3_1.17	B3 1				1						3							1												4
		ChAOS B3_1.18	B3 1										3																			5
		ChAOS B3_1.19	B3 1										3																			4
		ChAOS B3_1.20	B3 1				1						3											1								5
		ChAOS B13_1.01	B13 1										1						1	1			1	1
		ChAOS B13_1.02	B13 1																	1	1
		ChAOS B13_1.03	B13 1																1	1
		ChAOS B13_1.04	B13 1																	1																										2
		ChAOS B13_1.05	B13 1																	2
		ChAOS B13_1.06	B13 1																	1																				1						2
		ChAOS B13_1.07	B13 2																	1				1
		ChAOS B13_1.08	B13 1																	1																							1			1
		ChAOS B13_1.09	B13 1																	1
		ChAOS B13_1.10	B13 1																	1												1
		ChAOS B13_1.11	B13 1																					1								1														3
		ChAOS B13_1.12	B13 1																											1																1
		ChAOS B13_1.13	B13 1																	1		2																								1
		ChAOS B13_1.14	B13 1																	2
		ChAOS B13_1.15	B13 1																	1																										2
		ChAOS B13_1.16	B13 1										1		1																											1				1
		ChAOS B13_1.17	B13 1																	1																			1							1		1
		ChAOS B13_1.18	B13 1																1	1				1																						1
		ChAOS B13_1.19	B13 1			1						1								1			1
		ChAOS B13_1.20	B13 1																	1
		ChAOS B13_2.01	B13 2																	2	1																											6
		ChAOS B13_2.02	B13 2		1	1						1								1																												1
		ChAOS B13_2.03	B13 2																	1																												1
		ChAOS B13_2.04	B13 2																	1																										1		1
		ChAOS B13_2.05	B13 2																	1															1
		ChAOS B13_2.06	B13 2																	2																												1
		ChAOS B13_2.07	B13 2																	3		1		2
		ChAOS B13_2.08	B13 2		1															1																										1
		ChAOS B13_2.09	B13 2									1								1				1					1	1
		ChAOS B13_2.10	B13 2										1																																	2
		ChAOS B13_2.11	B13 2																			1																								2
		ChAOS B13_2.12	B13 2										1							2				1
		ChAOS B13_2.13	B13 2																	2				3
		ChAOS B13_2.14	B13 2																	1				1																						2
		ChAOS B13_2.15	B13 2									1		1										1											1											1
		ChAOS B13_2.16	B13 2				1																	1					1													1
		ChAOS B13_2.17	B13 2																					2					1														2
		ChAOS B13_2.18	B13 2									1																	1																			4
		ChAOS B13_2.19	B13 2																	1				2
		ChAOS B13_2.20	B13 2										1							1				10																						1
		ChAOS B13_4.01	B13 4																	1																												1
		ChAOS B13_4.02	B13 4																	1															1
		ChAOS B13_4.03	B13 4																	1															1
		ChAOS B13_4.04	B13 4																					2															1	1
		ChAOS B13_4.05	B13 4																	1																										1
		ChAOS B13_4.06	B13 4				2												1	1																										3
		ChAOS B13_4.07	B13 4				3													1				2																						2
		ChAOS B13_4.08	B13 4				2													1
		ChAOS B13_4.09	B13 4				2																												1				1
		ChAOS B13_4.10	B13 4																	1															1
		ChAOS B13_4.11	B13 4				1													1
		ChAOS B13_4.12	B13 4																	2				1
		ChAOS B13_4.13	B13 4				1						1											2																1
		ChAOS B13_4.14	B13 4																	1																						1				2		1
		ChAOS B13_4.15	B13 4																	1																										3
		ChAOS B13_4.16	B13 4																	1
		ChAOS B13_4.17	B13 4										1							1																										1
		ChAOS B13_4.18	B13 4																	1																										1
		ChAOS B13_5.01	B13 5																					3																			1			1
		ChAOS B13_5.02	B13 5																																1					1			1
		ChAOS B13_5.03	B13 5																1					1											1											3		1
		ChAOS B13_5.04	B13 5																																											1
		ChAOS B13_5.05	B13 5									1	1																																	2
		ChAOS B13_5.06	B13 5																	2				1
		ChAOS B13_5.07	B13 5																	1									1														1					1
		ChAOS B13_5.08	B13 5																	1				1																						1
		ChAOS B13_5.09	B13 5																					2																						1		2
		ChAOS B13_5.10	B13 5																	1				4																		1
		ChAOS B13_5.11	B13 5				1													1		2								3												1
		ChAOS B13_5.12	B13 5																	1		2		1																						1		1
		ChAOS B13_5.13	B13 5									1								1																										1
		ChAOS B13_5.14	B13 5																	1		1																								1
		ChAOS B13_5.15	B13 5																	1																				1
		ChAOS B13_5.16	B13 5				1													1		2		1																								1
		ChAOS B13_5.17	B13 5										1							1																			1
		ChAOS B13_5.18	B13 5				1													1				1
		ChAOS B13_5.19	B13 5																	2		1													1
		ChAOS B13_5.20	B13 5																			1													1											3
		ChAOS B14_4.01	B14 4																																											1		2
		ChAOS B14_4.02	B14 4																	1																										1		1
		ChAOS B14_4.03	B14 4																	1																										5
		ChAOS B14_4.04	B14 4																	2																			1									3
		ChAOS B14_4.05	B14 4										1							1																										1		3
		ChAOS B14_4.06	B14 4																	3				1															1									1
		ChAOS B14_4.07	B14 4										1																1												1							2
		ChAOS B14_4.08	B14 4																	5																1										1		5
		ChAOS B14_4.09	B14 4																	1																												2
		ChAOS B14_4.10	B14 4																	1									1																	1		1
		ChAOS B14_4.11	B14 4																	1									1																	1
		ChAOS B14_4.12	B14 4										2																																	2
		ChAOS B14_4.13	B14 4																	2																										3		1
		ChAOS B14_4.14	B14 4										1																																	1		2
		ChAOS B14_4.15	B14 4																	1									1																	1		3
		ChAOS B14_4.16	B14 4										1							2										1
		ChAOS B14_4.17	B14 4										1							1									1																	1		2
		ChAOS B14_4.18	B14 4																	1										1									1							2		2
		ChAOS B14_4.19	B14 4																					1					1																	1
		ChAOS B14_4.20	B14 4																	1																					1					1		1
		ChAOS B14_1.01	B14 1																	1				1																	2
		ChAOS B14_1.02	B14 1																	3									1																	2		2
		ChAOS B14_1.03	B14 1																																				1	1	1							1
		ChAOS B14_1.04	B14 1																	3																										2
		ChAOS B14_1.05	B14 1																	1									1			1																1
		ChAOS B14_1.06	B14 1																	1																					2
		ChAOS B14_1.07	B14 1																																											1		1
		ChAOS B14_1.08	B14 1																	2																												2
		ChAOS B14_1.09	B14 1																	1																										1		1
		ChAOS B14_1.10	B14 1																	2																			1									2
		ChAOS B14_1.11	B14 1										1							1										1																1
		ChAOS B14_1.12	B14 1				1			1																			1																	2		2
		ChAOS B14_1.13	B14 1																	1																			1							1		1
		ChAOS B14_1.14	B14 1																	3																										2		1
		ChAOS B14_1.15	B14 1										1							2									1
		ChAOS B14_1.16	B14 1																	2
		ChAOS B14_1.17	B14 1																	1																			1	1						3
		ChAOS B14_1.18	B14 1																					1																						1
		ChAOS B14_1.19	B14 1																	1
		ChAOS B14_2.01	B14 2																					1																						1		1
		ChAOS B14_2.02	B14 2																	1				1																						1		3
		ChAOS B14_2.03	B14 2																	1				1
		ChAOS B14_2.04	B14 2																	1																										3		2
		ChAOS B14_2.05	B14 2																	3																												4
		ChAOS B14_2.06	B14 2																	1				1																1
		ChAOS B14_2.07	B14 2																	1																										1
		ChAOS B14_2.08	B14 2																	2																												2
		ChAOS B14_2.09	B14 2																	3									1																	1
		ChAOS B14_2.10	B14 2										1																			1							1									3
		ChAOS B14_2.11	B14 2																	1																										2
		ChAOS B14_2.12	B14 2										1							1																										4		1
		ChAOS B14_2.13	B14 2																	2																										3		1
		ChAOS B14_2.14	B14 2																	3																										3		1
		ChAOS B14_2.15	B14 2																	2									1																			4
		ChAOS B14_2.16	B14 2																	2																										1		2
		ChAOS B14_2.17	B14 2										1							3									1												1							2
		ChAOS B14_2.18	B14 2																	1																										1
		ChAOS B14_2.19	B14 2																	2																										1
		ChAOS B14_2.20	B14 2																	2																							1			1
		ChAOS B15_1.01	B15 1			1																	1	1
		ChAOS B15_1.02	B15 1																1	1				1												1												5
		ChAOS B15_1.03	B15 1																			1																				2	1			1		3
		ChAOS B15_1.04	B15 1			1																								1												1						3
		ChAOS B15_1.05	B15 1			1																		1																		2				1		4
		ChAOS B15_1.06	B15 1																											1										1			1					1
		ChAOS B15_1.07	B15 1			1																																								1		3
		ChAOS B15_1.08	B15 1																	2																												1
		ChAOS B15_1.09	B15 1																	1				1																								1
		ChAOS B15_1.10	B15 1																			1													1													3
		ChAOS B15_1.11	B15 1																											1												1				1		1
		ChAOS B15_1.12	B15 1																			1		2																						1		1
		ChAOS B15_1.13	B15 1																	1																						2						2
		ChAOS B15_1.14	B15 1																	1																										1
		ChAOS B15_1.15	B15 1																																					1						1		2
		ChAOS B15_1.16	B15 1																																1							1				1		1
		ChAOS B15_1.17	B15 1																	1																												1
		ChAOS B15_1.18	B15 1			1														1										1																		1
		ChAOS B15_1.19	B15 1				1												1	1																						2						1
		ChAOS B15_1.20	B15 1																	1																						1				1		1
		ChAOS B15_2.01	B15 10																	1										1																		4
		ChAOS B15_2.02	B15 10																	1										1												2
		ChAOS B15_2.03	B15 10																	2				1																		4	1			1		1
		ChAOS B15_2.04	B15 10			1														1																				1						1
		ChAOS B15_2.05	B15 10																					1																		1						2
		ChAOS B15_2.06	B15 10										1							1																						1						1
		ChAOS B15_2.07	B15 10																																											1		2
		ChAOS B15_2.08	B15 10			1																								1										1								2
		ChAOS B15_2.09	B15 10																	1				2						1																		1
		ChAOS B15_2.10	B15 10																											1										1								1
		ChAOS B15_2.11	B15 10																	1																						1				1
		ChAOS B15_2.12	B15 10																																								1					2
		ChAOS B15_2.13	B15 10																	2																										1		2
		ChAOS B15_2.14	B15 10																										1																			2
		ChAOS B15_2.15	B15 10							1													1						1	1																2		2
		ChAOS B15_2.16	B15 10																	1																			1							1		3
		ChAOS B15_2.17	B15 10																	1									1													1				1
		ChAOS B15_2.18	B15 10																	2																						2				1		3
		ChAOS B15_2.19	B15 10																	2																						2				3		4
		ChAOS B15_2.20	B15 11																																						2	1				1		1
		ChAOS B15_4.01	B15 12																	2				1																								2
		ChAOS B15_4.02	B15 12																			1																								1		1
		ChAOS B15_4.03	B15 12																	1																						1				1
		ChAOS B15_4.04	B15 12																	1		1							1	1												1	1			1		1
		ChAOS B15_4.05	B15 12										1							1																							1			2		2
		ChAOS B15_4.06	B15 12													1						1																				2						3
		ChAOS B15_4.07	B15 12																																					1	1					1		1
		ChAOS B15_4.08	B15 12																					1																			1			2		1
		ChAOS B15_4.09	B15 12																	2
		ChAOS B15_4.10	B15 12																										1													1				1		1
		ChAOS B15_4.11	B15 12																	1															1
		ChAOS B15_4.12	B15 12		1																								2														2			1		2
		ChAOS B15_4.13	B15 12																	1																												2
		ChAOS B15_4.14	B15 12																	1										1																		2
		ChAOS B15_4.15	B15 12																										1	1											1					1		4
		ChAOS B15_4.16	B15 12																	2																										1		3
		ChAOS B15_4.17	B15 12																													1														1		2
		ChAOS B15_4.18	B15 12																	1												1							1			1				1		2
		ChAOS B15_4.19	B15 12		1															1																										2		2
		ChAOS B15_4.20	B15 12																																							2				1		2
		ChAOS B15_5.01	B15 11																	1								1				1								1						1
		ChAOS B15_5.02	B15 11																	1																							1			1		1
		ChAOS B15_5.03	B15 11																	1																							1					3
		ChAOS B15_5.04	B15 11																										1																	3		1
		ChAOS B15_5.05	B15 11																	2												1																3
		ChAOS B15_5.06	B15 11																																								1					3
		ChAOS B15_5.07	B15 11																	1																										1		4
		ChAOS B15_5.08	B15 11		1																																						1
		ChAOS B15_5.09	B15 11			1														1																												1
		ChAOS B15_5.10	B15 11																													1											1			1		3
		ChAOS B15_5.11	B15 11									1								1			1																			1						3
		ChAOS B15_5.12	B15 11										1																							1												2
		ChAOS B15_5.13	B15 11																	1																						2	1
		ChAOS B15_5.14	B15 11																										1														1					2
		ChAOS B15_5.15	B15 11																	1																												2
		ChAOS B15_5.16	B15 11													1																1			1													1
		ChAOS B15_5.17	B15 11																					1						1																1
		ChAOS B15_5.18	B15 11									1												1																								1
		ChAOS B15_5.19	B15 11		1																											1								1		1						2
		ChAOS B15_5.20	B15 11										1																							1						2						2
		ChAOS B16_1.01	B16 1				1					1	2							28									1			1										1						8
		ChAOS B16_1.02	B16 1																	18									3							1							2					14
		ChAOS B16_1.03	B16 1										1							20																							1					11
		ChAOS B16_1.04	B16 1																	21									3														1					7
		ChAOS B16_1.05	B16 1																	15									1																			16
		ChAOS B16_1.06	B16 1		1							1								9									3																			7
		ChAOS B16_1.07	B16 1										2							17									2	1		2							1									16
		ChAOS B16_1.08	B16 1																	12									2			1																16
		ChAOS B16_1.09	B16 1																1	14									3														1					9
		ChAOS B16_1.10	B16 1		1															13									4						1								1					15
		ChAOS B16_1.11	B16 1										1							8		1										1			1					1								13
		ChAOS B16_1.12	B16 1										1							9									4																			10
		ChAOS B16_1.13	B16 1										1			1				15									1																			13
		ChAOS B16_1.14	B16 1		1							1	1																			3																14
		ChAOS B16_1.15	B16 1																	10				1					1	1																		14
		ChAOS B16_1.16	B16 1																	9									1	1									1							1		14
		ChAOS B16_1.17	B16 1																	7				1					2							1					1		1					14
		ChAOS B16_1.18	B16 1		1																																											13
		ChAOS B16_1.19	B16 1			1	1					1								11									1			4																11
		ChAOS B16_1.20	B16 1																	5									4																			14
		ChAOS B16_2.01	B16 2		1								1							4																							1			1		6
		ChAOS B16_2.02	B16 2																	3									1																	1		2
		ChAOS B16_2.03	B16 2		1															6									1
		ChAOS B16_2.04	B16 2		1																								1																			2
		ChAOS B16_2.05	B16 2																	3									4											1						3		1
		ChAOS B16_2.06	B16 2																	2									2																	1		1
		ChAOS B16_2.07	B16 2				1					3																	2			2				1												6
		ChAOS B16_2.08	B16 2				1						1							4									1																	4		1
		ChAOS B16_2.09	B16 2																	3									3																	4		1
		ChAOS B16_2.10	B16 2										1							2									4																			3
		ChAOS B16_2.11	B16 2		1																								1														1					3
		ChAOS B16_2.12	B16 2									1								2									4																			1
		ChAOS B16_2.13	B16 2																	5		1							2														1					1
		ChAOS B16_2.14	B16 2																										4												1					1		6
		ChAOS B16_2.15	B16 2									1								2									2																	1		2
		ChAOS B16_2.16	B16 2										1																1			1											1					2
		ChAOS B16_2.17	B16 2										1							2									1																			3
		ChAOS B16_2.18	B16 2										3							4									1																	1
		ChAOS B16_2.19	B16 2																	3									1						1								1					1
		ChAOS B16_2.20	B16 2																	5									1	1													1					3
		ChAOS B16_5.01	B16 5																	1									1	1													1			2		3
		ChAOS B16_5.02	B16 5		1								1																2																			2
		ChAOS B16_5.03	B16 5		1							1								8									4			1																3
		ChAOS B16_5.04	B16 5																	3		1																								2		3
		ChAOS B16_5.05	B16 5																	2									3																	4		4
		ChAOS B16_5.06	B16 5																										3			1														2		5
		ChAOS B16_5.07	B16 5																										2														1			1		5
		ChAOS B16_5.08	B16 5																										3			1										1	1			4		3
		ChAOS B16_5.09	B16 5		1																								2			2						1										6
		ChAOS B17_1.01	B17 1		1								2							1										1		4											1					1
		ChAOS B17_1.02	B17 1		1							1	3																	2		6									1		1
		ChAOS B17_1.03	B17 2										2							1										1		5											1					1
		ChAOS B17_2.01	B17 2									1								2												9								1		1
		ChAOS B17_2.02	B17 2		4		2		2	1		8	3							1										2		4	1									1						4
		ChAOS B17_2.03	B17 2																	3												2
		ChAOS B17_2.04	B17 2		2							1								3																												2
		ChAOS B17_2.05	B17 2									6										1										3										1						2
		ChAOS B17_2.06	B17 2																											1		3																1
		ChAOS B17_2.07	B17 2																	2										1		3																1
		ChAOS B17_2.08	B17 2		2							4																				4								1								2
		ChAOS B17_2.09	B17 2									1								1																							1			1		1
		ChAOS B17_2.10	B17 2		1							1								1												3											2
		ChAOS B17_3.01	B17 3		1				1			2								2		7								1																1		1
		ChAOS B17_3.02	B17 3		2															1				1						3		1
		ChAOS B17_3.03	B17 3									1	1							3												4																1
		ChAOS B17_3.04	B17 3									1								1		1								2									1							1		2
		ChAOS B17_3.05	B17 3		1															5												4					1											1
		ChAOS B17_3.06	B17 3		1	3	2					9	1							3												3	2						1			1						1
		ChAOS B17_3.07	B17 3									2	1							1												3																2
		ChAOS B17_3.08	B17 3									1										3										4																1
		ChAOS B17_3.09	B17 3																	1												1														1		1
		ChAOS B17_3.10	B17 3		1																	22								1												1
		ChAOS B17_3.11	B17 3			5			1			3			1														1			2										1				1		2
		ChAOS B17_3.12	B17 3																	1												2							1		1		2					1
		ChAOS B17_3.13	B17 3									1										1								1		3														1
		ChAOS B17_3.14	B17 3									1																1				1
		ChAOS B17_3.15	B17 3									2																				2
		ChAOS B17_3.16	B17 3			6						3	1							1				1								2	15							1								2
		ChAOS B17_3.17	B17 3		1																									1		3																3
		ChAOS B17_3.18	B17 3									1								4										1		3																1
		ChAOS B17_3.19	B17 3		1							1								1		3										5
		ChAOS B17_3.20	B17 3			3						1		1						4													4															5
		ChAOS B17_4.01	B17 4									2								1												3										2						5
		ChAOS B17_4.02	B17 4		1							1	1							1		1							1	1																		1
		ChAOS B17_4.03	B17 4																	2		14										5																4
		ChAOS B17_4.04	B17 4																	1		6										3
		ChAOS B17_4.05	B17 4		3															1												3										1				1		6
		ChAOS B17_4.06	B17 4									2	4									6										2
		ChAOS B17_4.07	B17 4																	1	1	2										1																1
		ChAOS B17_4.08	B17 4		1															2		3										2
		ChAOS B17_4.09	B17 4																			3								4		1																2
		ChAOS B17_4.10	B17 4		1															1		1										1
		ChAOS B17_4.11	B17 4																	3												1														2
		ChAOS B17_4.12	B17 4									2	2																			3																1
		ChAOS B17_4.13	B17 4																	1		2										1
		ChAOS B17_4.14	B17 4																1	2		3										2										1
		ChAOS B17_4.15	B17 4									1								2												1								1						1		3
		ChAOS B17_4.16	B17 4																			1		1						2		2
		ChAOS B17_4.17	B17 4									4																				1											1
		ChAOS B17_4.18	B17 4									1	1							1												2											1					3
		ChAOS B17_4.19	B17 4		2							2	1																			3									1
		ChAOS B17_4.20	B17 4									1								1		2										2
		ChAOS B17_5.01	B17 5		3					1		4		2						3												6																2
		ChAOS B17_5.02	B17 5		3							4	1							1		1										7																2
		ChAOS B17_5.03	B17 5		5															3												6																2
		ChAOS B17_5.04	B17 5		3				1			2								4										1		7			1													2
		ChAOS B17_5.05	B17 5		1															2												4																3
		ChAOS B17_5.06	B17 5						1			1								1		1							1	1		4																1
		ChAOS B17_5.07	B17 5		1		1					2								2												3								1								1
		ChAOS B17_5.08	B17 5						1											1										2		6																1
		ChAOS B17_5.09	B17 5		6							1								2									1			9
		ChAOS B17_5.10	B17 5		1							2																				8														1
		ChAOS B17_5.11	B17 5		1	3						1								1												8																3
		ChAOS B17_5.12	B17 5		2							4								1												2																3
		ChAOS B17_5.13	B17 5									3								1												5																3
		ChAOS B17_5.14	B17 5		1							2								2												6																1
		ChAOS B17_5.15	B17 5		1							4								2												5							1									2
		ChAOS B17_5.16	B17 5		1							2								2												6														2		2
		ChAOS B17_5.17	B17 5		1							7								2										1		9																4
		ChAOS B17_5.18	B17 5		2							4								3									1			7							1									2
		ChAOS B17_5.19	B17 5									2								2												8																1
		ChAOS B17_5.20	B17 5		1															2										3		3														1		1
[truncated: 43 more columns]

## Sheet: Figure 2
units	degrees	degrees	days sea ice per year
id	Long	Lat	2003	2004	2005	2006	2007	2008	2009	2010	2011	2012	2013	2014	2015	2016	2017	2018
B3	1.70716e+06	-823519	0	0	0	0	0	0	0	0	0	0	0	0	0	0	0	0
B13	1.6315e+06	-437260	0	0	0	0	0	0	0	0	0	0	0	0	0	0	0	0
B14	1.42218e+06	-367888	52.2472	19.726	0.550964	1.37741	0	0.273224	3.56164	1.65289	6.84932	0	8.56354	0	0	0	2.46575	1.64384
B15	1.23359e+06	-330450	75.5618	65.6593	51.5152	25.0689	39.9449	62.2951	46.3014	50.1377	45.4795	18.9041	38.9503	37.8082	48.6264	12.2951	34.2466	31.7808
B16	1.03872e+06	-279645	78.9326	57.1429	62.8099	28.9256	37.741	72.6776	58.0822	49.0358	50.6849	17.2603	29.0859	69.863	38.1868	15.847	39.4521	29.3151
B17	906361	-255761	94.1011	58.5165	77.135	34.9862	49.3113	83.3333	68.2192	64.7383	66.5753	16.4384	30.1939	62.4658	47.2527	4.64481	41.6438	6.84932

## Sheet: Figure 3
Key			site	numbers of morphotypes by functional group per 0.25m2
	Functional group key	Fig. 1A (nMDS) 0.25m		Polychaete annelids	gymnolaemate bryozoan	stenolaemate bryozoan	balanomorph barnacle crustaceans	colonial ascidian, chordates	solitary ascidian, chordates	priapulans	demospongiae, poiferans	errect gymnolaemate bryozoans	articulate brachiopod	crinoid echinoderm	basket star, echinoderms	suspension feeding malacostraca, crustacea	ophiuroid echinoderm	holothuroid echinoderm	deposit feeding polychaetes	sipunculans	echiurans	scaphopod molluscs	bivalve molluscs	burrowing echinoid, echinoderms	polyplacophora mollusc	gastropod mollusc	regular echinoid echinoderm	soft coral anthozoan cnidarians	actinaria anthozoan cnidarian	Seapen, anthozoan cnidarians	hydroid cnidarians	scleractinaria anthozoa cnidarian	Octocoral	errant polychaetes	nemerteans	turbellarian platyhelminthes	octopus, molluscs	asteroid echinoderm	predatory gastropod molluscs	Pisces, Chordata	pycnogonid chelicerate	Isopod, Malacostraca, Crustacea	spider crab, malacostraca crustacean	hermit crab malacostraca Crustacea	shrimp malacostracan Crustacea	crab/lobster malacostraca crustacean	generalist ophiuroids	Fig. 1B (nMDS) 0.5m
SP	Pioneer suspension feeders in individuals per image		B13									1						1	2	1		1	1																										B13
SC	Climax suspension feedersin individuals per image		B13															1	2	1																													B13
SS	Sedentary suspension feeders in individuals per image		B13															1	2																										2				B13
SM	Sessile suspension feeders in individuals per image		B13																3																										2				B13
DC	Deposit feeding crawlers in individuals per image		B13																3																				1						2				B13
DV	Deposit feeding worms in individuals per image		B13																2				1																1										B13
DS	Shelled deposit feeders in individuals per image		B13																2				1																			1			1				B13
GC	Grazers in individuals per image		B13																2																							1			1				B13
PS	Sessile soft bodied predators in individuals per image		B13																2												1																		B13
PC	Mobile soft bodied predators in individuals per image		B13																1				1								2														3				B13
PM	Sessile hard bodied predators in individuals per image		B13																				1						1		1														4				B13
PL	Mobile hard bodied predators in individuals per image		B13																1		2								1																2				B13
PA	Arthropod predators in individuals per image		B13																3		2																								1				B13
Mixed	Flexible strategy (more than one of the above) in individuals per image		B13																3																										2				B13
			B13									1		1					1																						1				3				B13
			B13															1	2				1															1							2				B13
			B13									1		1					1																			1			1				2				B13
			B13		1						1								2			1																											B13
			B13									1						1	2			1	1																										B13
			B13																3	1																											6		B13
			B13	1	1						1								2																												2		B15
			B13																2																										1		2		B15
			B13																3															1													1		B15
			B13	1															4		1		2																						1				B15
			B13								1	1							1				1					1	1																2				B15
			B13									1							1		1		1																						2				B15
			B13																3				4																						2				B15
			B13			1					1		1										2					1						1							1				1				B15
			B13								1												2					2														2					4		B15
			B13									1							2				12																						1				B15
			B13								1								1				2					1																			1		B15
			B13			1																	3					2													1	2							B15
			B13								1		1						1				2											1											3				B15
			B13									1							4				4																										B15
			B13									1									1																								4				B15
			B13	1							1								2				1					1	1																1				B15
			B13																5		1		2																								1		B15
			B13																2															1											1		1		B15
			B13	1	1						1								2																												2		B15
			B13									1							3	1			1																						1		6		B15
			B13																2															1													1		B16
			B13																1				2											1				1	1										B16
			B13			2												1	2																										4				B16
			B13			5													2				2																						2				B16
			B13			2													1															2				1											B16
			B13			1													3				1																										B16
			B13			1						1							1				2																1		1				2		1		B16
			B13																2																										3				B16
			B13									1							2																										2				B16
			B13									1							2																										1				B16
			B13																2																						1				5		1		B16
			B13			1						1							2				3																1										B16
			B13			1													2															1															B16
			B13			4													1															1				1											B17
			B13			5												1	2				2																						5				B17
			B13																1				2															1	1						1				B17
			B13																2															2															B17
			B13																2																										1		1		B17
			B13																				3											1					1			2			1				B17
			B13															1					1											1											4		1		B17
			B13								1	1							2				1																						2				B17
			B13																2				1					1														1			1		1		B17
			B13																1				6																		1				1		2		B17
			B13			1													2		4		1						3												1				1		1		B17
			B13								1								2		1																								2				B17
			B13			1													2		2		1																1								1		B17
			B13			1						1							2				1															1											B17
			B13																2		2													2											3				B17
			B13			1													3		1		1											1															B17
			B13			1						1							2		2		1															1									1		B17
			B13																2		1																		1						1				B17
			B13								1								2		2		1																						2		1		B17
			B13			1													2		2		4						3												2								B14
			B13																1				3																						2		2		B14
			B13																3				1					1														1					1		B14
			B13								1	1																																	3				B14
			B13															1					1											2					1			1			3		1		B14
			B13																		1		3											1								1			4				B14
			B15		1													1	1			1	2												1												5		B14
			B15		1																1								1												3	1			1		6		B14
			B15		1																		1						1										1		2	1			1		5		B14
			B15		1														2																										1		4		B14
			B15																1		1		1											1													4		B14
			B15																		1		1						1												1				2		2		B14
			B15																2																						2				1		2		B14
			B15																															1					1		1				2		3		B14
			B15		1														2										1																		2		B14
			B15			1												1	2																						3				1		2		B3
			B15																2										2												2						4		B3
			B15		1														3				1																1		4	1			2		1		B3
			B15									1							1				1																		2						3		B3
			B15		1																								1										1						1		4		B3
			B15																1				2						2										1								2		B3
			B15																1																						1	1			1		2		B3
			B15																2									1																	1		4		B3
			B15						1										1			1						1	1									1							3		5		B3
			B15																3									1													3				2				B3
			B15																2																					2	3				4		5		B3
			B15		1																	1	1																	2	1				1		1		B3
			B15															1	1		1		1												1						2	1			1		8		B3
			B15		2																		1						1												3				1		7		B3
			B15		1																								1										1			1			1		4		B3
			B15																3				1																								2		B3
			B15																		1								1					1							1				1		4		B3
			B15																1		1		2																		2				1		3		B3
			B15																1																				1						2		2		B3
			B15																1															1							1				1		2		B3
			B15		1	1												1	2										1												2						2
			B15																2										1												1				1		5
			B15																3				1						1												6	1			1		1
			B15		1														1				1																1		1				1		2
			B15									1							1																						1				1		3
			B15		1														1				2						2										1								3
			B15																1										1										1		1				1		1
			B15																2																							1			1		4
			B15						1													1						2	1																2		4
			B15																2									1										1			1				2		3
			B15																4																						4				4		7
			B15																2		1		1																						1		3
			B15																2		1							1	1												2	1			2		1
			B15									1			1				1		1																				2	1			2		5
			B15																				1																1	1		1			3		2
			B15																2									1													1				1		1
			B15	1															1									2						1								2			1		2
			B15																2										1																		4
			B15																2									1	1											1					2		7
			B15																1												2							1			1				2		4
			B15	1															1																						2				3		4
			B15																2				1																		2				1		4
			B15																1		1																				1				2		1
			B15									1							2		1							1	1												1	2			3		3
			B15												1						1																		1	1	2				1		4
			B15																2				1																			1			2		1
			B15																1									1						1							1				1		1
			B15	1															1									2														2			1		4
			B15																1									1	2											1					1		6
			B15																2												1														2		5
			B15	1															2												1							1			1				3		4
			B15																2								1				1								1			1			2		1
			B15																1									1														1			3		4
			B15																2												1											1					6
			B15	1															1																							1			1		4
			B15		1														1												1											1			1		4
			B15								1	1							1			1													1						1						5
			B15																1									1													2	2					2
			B15												1				1												1			1													3
			B15								1												2						1																1		1
			B15	1								1																			1				1						3						4
			B15									1							2								1				1				1				1		2				1		2
			B15																2																							2			1		4
			B15																2									1			1														3		4
			B15																1																							1			1		7
			B15	1	1														1																							1					1
			B15								1								1			1									1										1	1			1		6
			B15									1							1																1						2	1					2
			B15																1									1														1					4
			B15												1								1						1		1			1											1		1
			B15	1							1												1								1								1		1						3
			B16			1					1	2							46									4			1				1						1	2					22
			B16									1							41									3														2					18
			B16	1							1								24									4																			23
			B16									2							29									4	1		3							1									32
			B16	1													1		27									7						1								2					24
			B16									2							17		1							4			1			1					1								23
			B16	1							1	2			1				15									1			3																27
			B16																19				1					2	2									1							1		28
			B16	1															7				1					2							1					1		1					27
			B16		1	1					1								16									5			4																25
			B16			1					1	2							33									4			1										1						22
			B16									1							38									3							1							3					25
			B16																36									4														1					23
			B16	1							1	2							26									5	1		2							1									23
			B16															1	26									5			1											1					25
			B16	1								1							21		1							4			1			2					1			1					28
			B16									2			1				24									5																			23
			B16	1							1	1							10				1					1	1		3																28
			B16																16				1					3	1						1			1		1		1			1		28
			B16	1	1	1					1								11									1			4																24
			B16	1								1							7									1														1			2		8
			B16	2															6									2																			2
			B16																5									6											1						4		2
			B16			2					3	1							4									3			2				1										4		7
			B16									1							5									7																	4		4
			B16	1							1								2									5														1					4
			B16																5		1							6												1		1			1		7
			B16								1	1							2									3			1											1			1		4
			B16									4							6									2																	1		3
			B16																8									2	1					1								2					4
			B16	1															9									2																	1		2
			B16	1															3									5											1						3		3
			B16			1					3								2									4			2				1										1		7
			B16			1						1							7									4																	8		2
			B16	1								1							2									5														1					6
			B16								1								7		1							6														1					2
			B16								1								2									6												1					2		8
			B16									2							2									2			1											1					5
			B16									3							7									2						1								1			1		1
			B16	1								1							9									1	1													2			1		9
			B16	1								1							1									3	1													1			2		5
			B16	1							1								11		1							4			1														2		6
			B16																2									6			1														6		9
			B16																									5			1										1	2			5		8
			B16																									5			3						1				1	1			4		9
			B16																									5			1											1			3		10
			B16																5		1							3																	6		7
			B16	2							1	1							8									6			1																5
			B16	1															6									3	1		2						1					1			2		9
			B17	2							1	5							1										3		10									1		2					1
			B17								1	2							3										1		14								1		1	1					1
			B17	4		2		2	1		9	3							3										2		13	1							1		2						4
			B17	2							1								6												2																2
			B17								6										1								1		6										1						3
			B17	2							4								2										1		7								1								3
			B17	1							2								2												3											3			1		1
			B17	4		2		2	1		8	3							4										2		6	1									1						4
			B17	2							7								3		1										3										1						4
			B17																2										2		6																2
			B17	2							5								1												4								1			1			1		3
			B17	1							2								3												12								1		1	2
			B17	3				1			2								3		7		1						4		1														1		1
			B17								2	1							4		1								2		4							1							1		3
			B17	2	3	2					9	1							8												7	2				1		1			1						2
			B17								3	1							1		3										7																3
			B17	1															1		22								1		1										1				1		1
			B17		5			1			3			1					1									1			4							1		1	1	2			1		3
			B17								2										1						1		1		4														1
			B17		6						5	1							1				1								4	15							1								2
			B17	1							1								4										2		6																4
			B17	1	3						2		1						5		3										5	4															5
			B17	2							1	1							4				1						3		5																1
			B17	1							1								6		1								2		4					1		1							1		3
			B17	1	3	2					11	2							4												6	2						1			1						3
			B17								1								1		3										5														1		2
			B17	1	1			1			3			1							2							1	1		2										2				1		2
			B17								1								1		1								1		5							1		1		2			1		1
			B17								3																1				3
			B17	1	1	3					3	1							1				1						1		5	7							1								5
			B17																5		3								1		8																1
			B17	1	3			1			3		1						5		3								1			4													1		6
			B17	3				1			2								3		7		1						4		1														1		1
			B17	2							1	1							4				1						3		5																1
			B17								2	1							4		1								2		4							1							1		3
			B17	1							1								6		1								2		4					1		1							1		3
			B17	1	3	2					11	2							4												6	2						1			1						3
			B17								1								1		3										5														1		2
			B17	1	5			1			3			1							22							1	1		2										2				1		2
			B17								1								1		1								1		5							1		1		2			1		1
			B17								3																1				3
			B17	1	6						3	1							1				1						1		5	15							1								5
			B17	1							2								5		3								1		8																1
			B17	1	3						2		1						5		3										5	4															5
			B17	1							1								4										2		6																4
			B17		3						3	1							1				1								4	7							1								2
			B17								2										1						1		1		4														1
			B17		3			1			3			1					1									1			4							1		1	1	2			1		3
			B17	1															1		10								1		1										1				1		1
			B17								3	1							1		3										7																3
			B17	1		1					9	1							8												7	2				1		1			1						2
			B17	2							3	1							1		2										5									1
			B17								2	1							2		2										4											1					3
			B17	2							6	1																			4									1		1
			B17								1	1							1		1		1						2		4											1					3
			B17								5								2												2								1			1			1		3
			B17															1	2		4		1						2		4										1
			B17								1								3		2										2								1						1		3
			B17								2	2						1	2		3										5										1						1
			B17																4		2										2														2
			B17	1							1	1							1		1										4																1
			B17																3		3								4		2														2		2
			B17	2															3		4										3
			B17																1	1	5								2		2																3
			B17	1							2	4							2		9										4
			B17	3															2	1	2										4										1				1		7
			B17								1	2							1		12										5
			B17	3															3		14										8														1		10
			B17	1							1	1							2		7							1	1		3										1						1
			B17								2								3		7										8										2						9
			B17	1							3	1							2		1							1			3										2						6
			B14																1																										2		3
			B14																2																										6		1
			B14																3																			1							5		3
			B14									1							3																			1							1		6
			B14									1							4				1															1							1		4
			B14									1							3				1					1										1		1							3
			B14									1							5									1							1					1					1		7
			B14																2									1																	1		3
			B14																6																1										1		7
			B14																2									2																	2		1
			B14									2							1									1																	3
			B14									1							2																										4		3
			B14									2							2																										5		1
			B14									1							1									1																	2		5
			B14									1							3									1	1																1		3
			B14									1							2									1	1									1							3		4
			B14									2							3									1	1																1		2
			B14																1				1					1	1									1							3		2
			B14									1							2									1	1									1							3		4
			B14																1				1					1												1					2		1
			B14																3									1										1	1	1					2		3
			B14																4				1					1												2					2		2
			B14																2				1																	2
			B14																1																			1	1	1					2		1
			B14																4									1			1														2		1
			B14																1																					2					1		1
			B14																2																										1		3
			B14																3																										1		3
			B14																3																			1							1		3
			B14																2									1			1									2							1
			B14									1							3										1									1							1		2
			B14			1			1										1									1										1							3		3
			B14			1			1			1							1									1	1																3		2
			B14																4																			1							3		2
			B14									1							5									1																	2		1
			B14									1							4									1
			B14																1				1															1	1						4
			B14																1				1																						1
			B14																3																			1	1						3
			B14																1				2																						1		1
			B14																2				1																						4		5
			B14																4				1																								4
			B14																2				1																1						3		2
			B14																4																										1		4
			B14																3				1																1						1		2
			B14																4									1																	2
			B14																5									1																	1		2
			B14									1							3									1			1							1							1		3
			B14									1							2																										6		1
			B14									1							3																										7		2
			B14																5																										6		2
			B14									1							1												1							1							2		3
			B14																5									1																	3		5
			B14									1							5									1												1					1		4
			B14																4									1																	1		6
			B14									1							4									1												1					1		2
			B14																2																							1			1
			B14																3																										2
			B14																4				1																			1			3		1
			B3	2		4					2	2									1							1			6														1
			B3	3		2					3	3	1								1										6
			B3	1		3					1	3																1			7														1
			B3	1		1					1	9	1																		6
			B3								5	11																			5																2
			B3	1		1					3	5																			2
			B3	2	2	5					3	3																	1		4
			B3			1					3	8									2										8
			B3	2	1						1	4												1					1		7
			B3			1					6	7																			2																1
			B3	1		3					2	6												1							10
			B3								1	6									1										7
			B3	3							1	4																			7
			B3	5							1	6																			5
			B3	2								12																			4
			B3								3	6																			2
			B3	1							1	14									1										3
			B3	1							3	8																			4
			B3	1							1	4																			6
			B3								1	10									1										5
			B3									5																			4														1
			B3								1	3																			4
			B3	1								4									4																	1
			B3	3								4									3										1														1
			B3								1	4									2										2							1
			B3	2							1	5									1										1														1
			B3	1							1	2									1
			B3	1								6									2
			B3									9									1																								1
			B3	2								2																			1
			B3	1								6												1							1
			B3	1								5																																	1
			B3								1	4									1										1
			B3									9												1							1																1
			B3	1								4																			2
			B3								1	7																			2														1
			B3	1								6																			2
			B3								1	5									1										2																1
			B3								1	8																			4														1
			B3									6																			3														1
			B3									7										1
			B3									14
			B3			1					2	6																			1
			B3								1	6																																			1
			B3			4					4	4	2																		5
			B3								1	5																			1
			B3			1						7																			7
			B3								3	11																			5
			B3									12											2								5
			B3									3																			5														1
			B3									6																			3
			B3									14										1
			B3								1	7																			1
			B3			1					2	6																																			1
			B3			1					1	5	2																		2
			B3			3					3	5																			3
			B3								1	5																			5
			B3			1					2	9																			5
			B3								1	13											2								6
			B3									5																			4														1
			B3	2	3			1			5	10	1																		3																2
			B3								2	15												1							2
			B3									11																			2														1
			B3			1					3	4																											2
			B3	1		1					1	3																			1							1
			B3		5						2	2																	1		2
			B3			1						4																			2									1
			B3			1						11												1							4
			B3			1						6							1												9
			B3			1						6											1								9
			B3			1					1	11											1								6																1
			B3	2	3			1			4	11	1																		2
			B3								2	12												1							3
			B3			1					3	7																			4														1
			B3	1								4																			1								2
			B3		5	1					3	2																	1									1
			B3			1						4																			3									1
			B3			1						6																			4
			B3			1						9							1					1							5
			B3									6																			9
[truncated: 135 more columns]

## Sheet: Figure 4
				Latitude	number of morphotypes.m-2 (Figure 4 a)	no. functional groups (Fig 4a)		density (Figure 4 b) ind.m-2
	Data from 'Raw data' Tab			72.6322	4	4		57.6
	Upper plot	columm E	Column O	72.6338	5	2		64.8
	Upper plot	column E	Column BI	72.6338	6	2		72
	Lower plot	column E	Column P	72.6338	6	5		64.8
				72.6338	2	4		72
				72.6338	4	3		93.6
				72.6338	3	3		36
				72.6337	4	4		50.4
				72.6337	7	3		100.8
				72.6336	4	3		64.8
				72.6336	4	4		86.4
				72.6335	4	4		72
				72.6335	2	3		43.2
				72.6334	4	3		64.8
				72.6334	3	4		57.6
				72.6333	2	4		72
				72.6333	5	2		72
				72.6332	2	3		57.6
				72.6332	2	2		21.6
				72.6325	2	3		57.6
				72.6325	3	5		43.2
				72.6324	2	4		28.8
				72.6323	3	2		28.8
				72.6323	3	3		43.2
				72.6323	3	3		28.8
				72.6322	5	2		57.6
				72.6322	2	1		21.6
				72.6321	2	2		14.4
				72.6322	2	5		50.4
				72.6322	2	3		28.8
				72.6321	2	5		21.6
				72.6321	2	4		14.4
				72.6322	2	5		50.4
				72.6322	3	3		36
				72.6322	4	4		36
				72.6322	2	5		21.6
				72.6322	3	3		28.8
				72.6322	2	4		36
				72.6322	3	3		36
				72.6321	2	3		43.2
				72.6321	1	7		21.6
				72.6321	2	1		36
				72.6321	1	2		72
				72.6321	1	3		28.8
				72.6322	3	3		36
				72.6322	3	3		36
				72.6323	3	4		36
				72.6322	1	4		21.6
				72.6324	5	6		57.6
				72.6325	4	8		79.2
				72.6325	1	7		21.6
				72.6326	3	1		28.8
				72.6326	2	2		50.4
				72.6327	3	1		57.6
				72.6328	3	6		64.8
				72.6328	3	1		72
				72.6329	3	4		86.4
				72.6329	2	5		50.4
				72.633	2	7		21.6
				72.6331	2	3		43.2
				72.6338	3	3		72
				72.6338	8	2		122.4
				72.6339	1	2		64.8
				72.6339	4	3		79.2
				72.634	2	5		50.4
				72.634	3	3		50.4
				72.634	3	4		43.2
				72.634	2	4		28.8
				72.634	3	2		28.8
				72.634	4	2		28.8
				72.634	4	5		64.8
				72.634	2	3		21.6
				72.634	4	3		43.2
				72.634	2	4		14.4
				72.634	3	2		64.8
				72.634	3	3		57.6
				72.634	4	3		64.8
				72.634	2	3		57.6
				72.634	2	2		50.4
				72.634	4	3		72
				74.5009	5	5		36
				74.5009	2	4		14.4
				74.5009	2	3		14.4
				74.5009	2	4		21.6
				74.5009	1	4		14.4
				74.5008	3	4		28.8
				74.5004	2	6		14.4
				74.5008	3	4		21.6
				74.5008	1	5		7.2
				74.5008	2	5		14.4
				74.5007	3	4		36
				74.5007	2	5		14.4
				74.5007	3	5		28.8
				74.5007	1	4		14.4
				74.5006	2	5		21.6
				74.5006	4	4		28.8
				74.5006	4	6		28.8
				74.5006	4	5		28.8
				74.5006	4	4		28.8
				74.5005	1	5		7.2
				74.5004	3	3		64.8
				74.5004	5	4		36
				74.5005	2	6		14.4
				74.5005	3	8		21.6
				74.5005	2	5		14.4
				74.5005	2	4		21.6
				74.5006	3	8		43.2
				74.5006	3	7		21.6
				74.5006	5	6		36
				74.5006	2	6		21.6
				74.5007	2	5		21.6
				74.5007	3	6		28.8
				74.5007	2	6		36
				74.5008	3	5		28.8
				74.5008	5	5		36
				74.5008	4	5		28.8
				74.5009	3	7		36
				74.5009	3	5		43.2
				74.5009	2	7		21.6
				74.501	4	5		93.6
				74.499	2	6		14.4
				74.499	2	7		14.4
				74.4991	2	4		14.4
				74.4991	3	1		28.8
				74.4991	2	2		14.4
				74.4992	4	2		50.4
				74.499	4	1		57.6
				74.4993	2	3		21.6
				74.4991	3	2		28.8
				74.4993	2	2		14.4
				74.4994	2	1		14.4
				74.4994	2	2		21.6
				74.4994	4	3		36
				74.4994	4	2		36
				74.4995	2	2		28.8
				74.4995	1	1		7.2
				74.4996	3	2		21.6
				74.4996	2	3		14.4
				74.5002	3	4		36
				74.5002	3	4		21.6
				74.5002	5	4		50.4
				74.4994	1	1		7.2
				74.4995	3	2		28.8
				74.5001	2	4		21.6
				74.5	4	2		28.8
				74.5	3	3		21.6
				74.5	3	2		36
				74.4998	3	2		43.2
				74.4998	5	2		57.6
				74.4997	5	3		43.2
				74.4997	3	4		21.6
				74.4996	3	2		21.6
				74.4996	2	2		14.4
				74.4995	5	3		43.2
				74.4995	3	2		21.6
				74.4995	3	3		21.6
				74.4994	3	4		28.8
				74.4994	3	4		36
				76.4989	2	3		21.6
				76.4989	3	3		21.6
				76.499	2	2		43.2
				76.499	3	4		43.2
				76.499	4	2		43.2
				76.4991	4	2		43.2
				76.4991	4	2		36
				76.4992	4	2		86.4
				76.4992	2	2		21.6
				76.4992	4	4		28.8
				76.4993	3	4		21.6
				76.4994	2	2		28.8
				76.4994	3	3		43.2
				76.4995	3	2		28.8
				76.4995	4	2		43.2
				76.4995	3	2		28.8
				76.4996	5	4		43.2
				76.4996	5	3		50.4
				76.4997	3	2		21.6
				76.4998	4	1		28.8
				76.5008	3	3		28.8
				76.5008	4	2		57.6
				76.5007	4	2		28.8
				76.5008	2	3		36
				76.5008	4	4		28.8
				76.5007	2	1		21.6
				76.4992	2	2		14.4
				76.5008	2	2		28.8
				76.5008	3	4		21.6
				76.5008	3	3		36
				76.5007	4	3		28.8
				76.5007	5	3		50.4
				76.5007	4	4		28.8
				76.5007	3	4		43.2
				76.5007	3	3		28.8
				76.5007	1	2		14.4
				76.5007	4	2		43.2
				76.5007	2	4		14.4
				76.5006	1	3		7.2
				76.5007	3	3		21.6
				76.5007	4	2		43.2
				76.5007	2	3		14.4
				76.5007	3	2		43.2
				76.5006	2	5		50.4
				76.5005	3	3		21.6
				76.5005	2	4		14.4
				76.5005	2	4		28.8
				76.5004	3	4		36
				76.5004	4	3		43.2
				76.5003	2	2		21.6
				76.5002	4	3		50.4
				76.5002	3	3		43.2
				76.5002	3	3		50.4
				76.5001	3	4		50.4
				76.5001	3	3		36
				76.5	5	2		57.6
				76.4999	2	3		14.4
				76.4999	2	3		21.6
				76.4999	3	2		28.8
				78.2508	3	4		21.6
				78.2509	5	5		64.8
				78.2509	5	3		57.6
				78.2511	4	3		43.2
				78.2511	5	3		64.8
				78.2512	4	4		28.8
				78.2512	3	4		36
				78.2513	2	3		21.6
				78.2513	3	4		21.6
				78.2514	3	2		36
				78.2514	4	4		28.8
				78.2515	4	4		36
				78.2515	3	3		36
				78.2515	2	2		14.4
				78.2516	3	2		28.8
				78.2516	4	3		28.8
				78.2517	2	2		14.4
				78.2517	4	5		28.8
				78.2518	5	4		43.2
				78.2518	4	3		28.8
				78.2517	3	3		43.2
				78.2517	3	3		28.8
				78.2517	6	3		72
				78.2517	4	3		28.8
				78.2518	3	3		28.8
				78.22	4	2		28.8
				78.2525	2	4		21.6
				78.2526	4	3		36
				78.2526	4	4		36
				78.2526	3	3		21.6
				78.2526	3	3		21.6
				78.2526	2	1		21.6
				78.2526	3	3		36
				78.2526	2	2		21.6
				78.2526	6	4		57.6
				78.2526	4	2		43.2
				78.2526	4	3		28.8
				78.2526	4	4		57.6
				78.2526	4	3		79.2
				78.2526	4	3		36
				78.2508	3	5		36
				78.2508	3	4		21.6
				78.2508	3	2		21.6
				78.2508	8	5		57.6
				78.2508	5	3		50.4
				78.2508	4	3		50.4
				78.2508	4	3		28.8
				78.2508	4	3		36
				78.2508	1	2		14.4
				78.2508	4	3		28.8
				78.2508	2	2		14.4
				78.2508	5	3		57.6
				78.2508	2	3		21.6
				78.2508	3	5		28.8
				78.2508	5	3		57.6
				78.2508	3	2		43.2
				78.2508	3	3		28.8
				78.2508	6	2		50.4
				78.2508	4	4		43.2
				78.2508	3	3		36
				78.2515	5	3		36
				78.2517	4	5		28.8
				78.2517	3	4		36
				78.2518	3	5		36
				78.2518	3	5		43.2
				78.2519	2	4		28.8
				78.2519	3	4		43.2
				78.252	2	3		14.4
				78.252	3	5		21.6
				78.2521	4	5		43.2
				78.2521	5	3		50.4
				78.2522	3	5		28.8
				78.2523	3	6		28.8
				78.2523	3	6		28.8
				78.2523	2	4		21.6
				78.2524	4	5		28.8
				78.2524	3	4		21.6
				78.2524	3	4		21.6
				78.2525	5	5		43.2
				78.2525	4	7		43.2
				80.1155	8	2		309.6
				80.1157	5	5		273.6
				80.1157	4	3		237.6
				80.1158	4	5		230.4
				80.1158	3	4		230.4
				80.1159	5	3		151.2
				80.1159	7	3		295.2
				80.116	4	5		223.2
				80.1161	5	4		201.6
				80.1162	6	5		252
				80.1164	7	6		187.2
				80.1165	4	4		172.8
				80.1165	5	4		223.2
				80.1166	5	4		144
				80.1166	5	4		194.4
				80.1167	6	4		194.4
				80.1167	7	4		194.4
				80.1168	2	4		100.8
				80.1169	7	4		216
				80.117	3	4		165.6
				80.114	6	4		100.8
				80.1141	4	5		50.4
				80.1141	3	4		57.6
				80.1141	3	4		28.8
				80.1142	5	4		86.4
				80.1142	4	5		43.2
				80.1143	6	3		108
				80.1143	6	4		86.4
				80.1143	4	3		79.2
				80.1143	4	3		72
				80.1144	4	3		43.2
				80.1144	4	4		57.6
				80.1144	5	6		72
				80.1145	4	5		86.4
				80.1145	5	5		57.6
				80.1145	5	5		43.2
				80.1145	4	7		50.4
				80.1145	4	2		64.8
				80.1145	5	4		50.4
				80.1146	5	5		79.2
				80.0938	6	2		64.8
				80.0938	4	3		43.2
				80.0938	6	5		129.6
				80.0939	4	3		64.8
				80.0939	4	5		93.6
				80.0939	4	6		79.2
				80.0939	4	4		64.8
				80.0939	6	4		93.6
				80.0939	5	6		86.4
				81.3225	7	5		79.2
				81.3293	7	8		108
				81.3301	6	4		79.2
				81.3171	5	4		100.8
				81.317	12	4		237.6
				81.317	2	4		36
				81.3169	4	6		57.6
				81.3168	5	5		93.6
				81.3167	3	4		36
				81.3166	4	3		50.4
				81.3166	5	2		93.6
				81.3166	5	8		36
				81.3166	5	3		57.6
				81.3102	8	4		115.2
				81.3101	5	4		57.6
				81.3101	5	5		72
				81.31	7	5		64.8
				81.3099	5	5		86.4
				81.3098	11	3		194.4
				81.3098	5	2		64.8
				81.3097	4	5		64.8
				81.3097	4	2		28.8
				81.3096	4	3		180
				81.3095	9	3		122.4
				81.3094	6	3		57.6
				81.3094	5	3		50.4
				81.3093	3	3		21.6
				81.3092	2	3		28.8
				81.3091	9	2		230.4
				81.3091	4	4		57.6
				81.309	5	6		72
				81.3089	5	3		79.2
				81.3088	6	3		129.6
				81.3022	5	5		93.6
				81.3021	8	4		57.6
				81.302	4	3		180
				81.302	3	5		72
				81.3019	6	5		108
				81.3018	4	4		100.8
				81.3018	5	6		43.2
				81.3017	4	4		57.6
				81.3016	4	5		72
				81.3016	4	6		28.8
				81.3016	3	3		43.2
				81.3015	4	4		57.6
				81.3015	3	4		28.8
				81.3014	5	5		64.8
				81.3014	6	5		64.8
				81.3013	4	4		43.2
				81.3012	3	5		43.2
				81.3012	6	6		64.8
				81.3011	5	6		64.8
				81.3011	4	5		43.2
						6
						4
						5
						2
						3
						2
						3
						4
						4
						4
						4
						2
						4
						2
						2
						3
						3
						4
						3
						5
						5
						3
						4
						3
						4
						2
						2
						3
						2
						2
						2
						3
						3
						4
						3
						4
						3
						3
						1
						3
						2
						1
						3
						4
						2
						3
						2
						3
						2
						2
						3
						3
						2
						4
						3
						3
						3
						3
						5
						2
						2
						2
						#REF!
						#REF!
						#REF!
						#REF!
						#REF!
						#REF!
						#REF!
						#REF!
						#REF!
						#REF!
						#REF!
						#REF!
						#REF!
						#REF!
						#REF!
						#REF!
						#REF!
						#REF!
						#REF!
						#REF!
						#REF!
						#REF!
						#REF!
						#REF!
						#REF!
						#REF!
						#REF!
						#REF!
						#REF!
						#REF!
						#REF!
						#REF!
						#REF!
						#REF!
						#REF!
						#REF!
						#REF!
						#REF!
						#REF!
						#REF!
						#REF!
						#REF!
						#REF!
						#REF!
						#REF!
						#REF!
						#REF!
						#REF!
						#REF!
						#REF!
						#REF!
						#REF!
						#REF!
						#REF!
						#REF!
						#REF!
						#REF!
						#REF!
						#REF!
						#REF!
						#REF!
						#REF!
						#REF!
						#REF!
						#REF!
						#REF!
						#REF!
						#REF!
						#REF!
						#REF!
						#REF!
						#REF!
						#REF!
						#REF!
						#REF!
						#REF!
						#REF!
						#REF!
						#REF!
						#REF!
						#REF!
						#REF!
						#REF!
						#REF!
						#REF!
						#REF!
						#REF!
						#REF!
						#REF!
						#REF!
						#REF!
						#REF!
						#REF!
						#REF!
						#REF!
						#REF!
						#REF!
						#REF!
						#REF!
						#REF!
						#REF!
						#REF!
						#REF!
						#REF!
						#REF!
						#REF!
						#REF!
						#REF!
						#REF!
						#REF!
						#REF!
						#REF!
						#REF!
						#REF!
						#REF!
						#REF!
						#REF!
						#REF!
						#REF!
						#REF!
						#REF!
						#REF!
						#REF!
						#REF!
						#REF!

## Sheet: Figure 5
Site	Pie size (Mean no. functional groups)	ST Dev	Functional group type+	Segment size (proportion of site dominated by functional group)		Site	substrate	individuals per image														no. functional groups	no. suspension	Total	%suspension		%primary consumers															dominance				Polychaete annelids	gymnolaemate bryozoan	stenolaemate bryozoan	balanomorph barnacle crustaceans
						B4	1	9	1	0	0	0	1	1	0	0	0	0	0	0	0	4	10	12	83.3333	12	100																			9
B3	2.4625	0.881917		0.1125		B4	1	1	0	0	2	0	0	0	0	0	0	0	0	0	0	2	3	3	100	3	100																			1
				0.75		B4	2	20	0	0	1	0	0	0	0	0	0	0	0	0	0	2	21	21	100	21	100																			20
				0.1375		B4	1	10	0	0	0	0	1	1	0	3	0	1	0	0	0	5	10	16	62.5	12	75																			10
						B4	1	10	0	0	0	0	4	0	0	1	0	0	0	1	5	4	10	21	47.619	14	66.6667																			10
B13	2.60256	0.930574		0.371795		B4	1	5	0	0	1	0	0	2	0	0	0	0	0	0	0	3	6	8	75	8	100																			5
				0.371795		B4	1	10	0	0	0	0	0	0	0	0	0	1	0	0	5	3	10	16	62.5	10	62.5																			10
				0.192308		B4	1	10	0	0	0	0	0	2	0	4	0	0	0	0	1	4	10	17	58.8235	12	70.5882																			10
				0.0512821		B4	1	5	0	0	0	0	0	0	0	2	0	1	0	0	0	3	5	8	62.5	5	62.5																			5
				0.0128205		B4	2	3	0	0	0	0	0	2	0	5	0	0	0	0	0	3	3	10	30	5	50																			3
						B4	2	11	0	0	0	0	2	1	0	3	0	0	0	0	0	4	11	17	64.7059	14	82.3529																			10	1
B14	2.91525	0.933812		0.36		B4	2	6	1	0	0	0	1	0	0	3	0	0	0	0	0	4	7	11	63.6364	8	72.7273																			3	3
				0.237288		B4	2	0	0	0	1	0	0	0	0	0	0	1	0	0	1	3	1	3	33.3333	1	33.3333
				0.20339		B4	2	1	0	0	0	0	0	1	0	5	0	0	0	0	0	3	1	7	14.2857	2	28.5714																			1
				0.186441		B4	1	6	0	0	0	0	1	0	0	8	0	0	0	0	1	4	6	16	37.5	7	43.75																			6
				0.0169492		B4	1	10	0	0	1	0	2	0	0	3	0	0	0	0	0	4	11	16	68.75	13	81.25																			10
						B4	1	2	0	0	0	0	0	0	0	3	0	0	0	0	0	2	2	5	40	2	40																			2
B15	3.175	0.8969		0.341772		B4	1	3	0	0	1	0	1	0	0	4	0	0	0	0	0	3	4	9	44.4444	5	55.5556																			3
				0.329114		B4	1	5	0	0	0	0	0	0	0	2	0	0	0	0	0	2	5	7	71.4286	5	71.4286				137			24	0			50		1	14					5
				0.253165		B4	2	1	0	0	0	0	0	1	0	0	0	0	0	0	1	3	1	3	33.3333	2	66.6667	128	2	0	7	0	13	11	0	46	0	4	0	1	14		3.25				1
				0.0886076		B6	3	5	1	0	0	1	0	0	0	3	1	0	0	0	0	5	6	11	54.5455	7	63.6364																			4		1
						B6	2	6	0	0	0	0	0	0	0	11	1	0	1	0	0	4	6	19	31.5789	6	31.5789																			2	3
						B6	2	3	0	0	0	0	0	0	0	2	0	0	0	0	0	2	3	5	60	3	60																			3
B16	4.22449	0.963183		0.4375		B6	3	5	0	0	0	0	0	1	0	9	0	0	0	0	0	3	5	15	33.3333	6	40																			2	3
				0.3125		B6	2	0	0	0	0	1	0	2	0	4	0	0	0	0	0	3	0	7	0	3	42.8571
				0.166667		B6	2	4	0	0	0	0	0	0	0	4	0	0	0	0	0	2	4	8	50	4	50																			3	1
				0.0833333		B6	2	0	0	0	0	0	0	0	0	7	0	0	0	0	0	1	0	7	0	0	0
				0.0208333		B6	2	1	0	0	0	0	0	0	0	2	0	0	0	0	0	2	1	3	33.3333	1	33.3333																				1
						B6	2	1	0	0	0	0	3	1	0	14	0	0	0	1	0	5	1	20	5	5	25																				1
B17	4.34247	1.35625		0.424658		B6	2	1	0	0	0	0	2	0	0	7	0	0	0	0	0	3	1	10	10	3	30																				1
				0.178082		B6	2	2	0	0	0	1	0	1	0	6	0	1	0	0	0	5	2	11	18.1818	4	36.3636																			2
				0.178082		B6	2	0	0	0	0	1	1	0	0	7	0	0	2	0	0	4	0	11	0	2	18.1818
				0.136986		B6	2	1	0	0	0	0	1	0	0	4	0	0	1	1	0	5	1	8	12.5	2	25																				1
				0.0547945		B6	2	3	0	0	0	0	0	0	0	4	0	0	1	0	0	3	3	8	37.5	3	37.5																			1	1	1
				0.0273973		B6	2	2	0	0	0	1	0	1	0	5	0	0	0	0	0	4	2	9	22.2222	4	44.4444																			1	1
						B6	3	7	0	0	0	1	0	1	1	14	0	0	0	0	0	5	7	24	29.1667	10	41.6667																			2	2	3
						B6	3	2	0	0	0	0	0	0	0	6	1	0	0	0	0	3	2	9	22.2222	2	22.2222																			2
						B6	2	2	0	0	0	0	2	1	0	3	0	0	0	0	0	4	2	8	25	5	62.5																				1	1
						B6	3	7	0	0	1	0	0	0	0	16	0	0	0	0	0	3	8	24	33.3333	8	33.3333				56			23				138		8						4	2	1
						B6	2	2	0	0	0	0	0	0	0	6	0	0	1	0	0	3	2	9	22.2222	2	22.2222	54	1	0	1	6	9	8	1	134	3	1	6	2	0		3.45				2
						B8	4	39	3	0	0	0	10	4	1	8	0	0	0	2	0	7	42	67	62.6866	57	85.0746																			3	5		1
						B8	2	10	0	0	0	0	0	0	0	0	0	0	0	0	0	1	10	10	100	10	100																			3	7
						B8	2	5	0	0	0	0	0	0	0	2	0	0	0	0	0	2	5	7	71.4286	5	71.4286																			2	3
						B8	2	7	0	0	0	0	0	1	0	1	0	0	0	0	0	3	7	9	77.7778	8	88.8889																			3	4
						B8	2	7	0	0	0	0	0	0	0	1	0	0	0	1	0	3	7	9	77.7778	7	77.7778																			2	5
						B8	2	9	0	0	0	0	0	1	0	2	0	0	0	0	0	3	9	12	75	10	83.3333																			5	4
						B8	4	36	2	0	0	0	0	0	0	8	0	0	1	0	0	4	38	47	80.8511	38	80.8511																			10	20	5
						B8	4	50	3	0	0	0	2	0	0	23	0	0	0	0	0	4	53	78	67.9487	55	70.5128																			10	20	3	1
						B8	4	41	2	0	0	0	0	0	2	13	0	0	1	4	0	6	43	63	68.254	45	71.4286																			10	10
						B8	4	40	1	0	0	1	20	3	2	14	0	0	0	1	0	8	41	82	50	67	81.7073																			10	10	4
						B8	4	28	2	0	0	0	6	30	1	11	0	0	0	3	0	7	30	81	37.037	67	82.716																			10	10	5
						B8	3	14	0	0	0	0	0	0	0	0	0	0	0	0	0	1	14	14	100	14	100																			5	6	2
						B8	3	10	0	0	0	0	0	0	0	1	0	0	0	0	0	2	10	11	90.9091	10	90.9091																			3	5	2
						B8	3	7	0	0	0	0	0	0	0	0	0	0	0	0	0	1	7	7	100	7	100																			1	4	2
						B8	4	23	1	0	0	1	0	4	0	5	0	0	0	1	0	6	24	35	68.5714	29	82.8571																			10	10	3
						B8	3	9	0	0	0	0	0	0	0	0	0	0	0	0	0	1	9	9	100	9	100																			3	5
						B8	4	21	1	0	0	0	0	0	5	6	0	0	0	0	0	4	22	33	66.6667	27	81.8182																			10	10	1
						B8	4	23	7	0	0	0	0	0	3	12	0	0	1	0	0	5	30	46	65.2174	33	71.7391																			10	10
						B8	4	24	4	0	0	1	0	1	7	8	0	0	1	0	0	7	28	46	60.8696	37	80.4348																			10	10
						B8	4	19	0	0	0	0	0	0	1	2	0	0	0	0	0	3	19	22	86.3636	20	90.9091				458			85				118								5	10	2	2
						B8	4	10	0	0	0	0	0	0	4	1	0	0	0	0	0	3	10	15	66.6667	14	93.3333	432	26	0	0	3	38	44	26	118	0	0	4	12	0		3.85714			4	6
						B11	1	2	0	0	6	0	0	0	0	0	0	0	0	0	0	2	8	8	100	8	100																			2
						B11	1	3	0	0	5	0	0	0	0	0	0	0	0	0	0	2	8	8	100	8	100																			3
						B11	1	2	0	0	8	0	2	0	0	0	0	0	0	0	0	3	10	12	83.3333	12	100																			2
						B11	1	2	0	0	4	0	1	0	0	1	0	1	0	0	0	5	6	9	66.6667	7	77.7778																			2
						B11	1	1	0	0	3	0	1	0	0	0	0	0	0	0	2	3	4	7	57.1429	5	71.4286																			1
						B11	1	1	0	0	0	0	0	0	0	1	0	0	1	0	1	4	1	4	25	1	25																			1
						B11	1	1	0	0	0	0	1	0	0	0	0	0	1	0	1	4	1	4	25	2	50																			1
						B11	1	2	0	0	2	0	0	0	0	0	0	0	0	0	0	2	4	4	100	4	100																			2
						B11	1	0	0	0	2	0	0	0	0	0	0	0	0	1	0	2	2	3	66.6667	2	66.6667
						B11	1	0	0	0	1	0	1	1	0	1	0	0	1	0	0	5	1	5	20	3	60
						B11	1	0	0	0	0	0	1	1	0	0	0	0	0	0	1	3	0	3	0	2	66.6667
						B11	1	0	0	0	3	0	0	0	0	0	0	0	1	1	0	3	3	5	60	3	60
						B11	1	0	0	0	3	0	1	1	0	0	0	0	0	0	1	4	3	6	50	5	83.3333
						B11	1	0	0	0	1	0	0	0	0	0	0	0	0	0	1	2	1	2	50	1	50
						B11	1	0	0	0	4	0	1	0	0	1	0	0	0	0	0	3	4	6	66.6667	5	83.3333
						B11	1	2	0	0	0	0	0	1	0	1	0	0	0	0	0	3	2	4	50	3	75																			2
						B11	1	0	0	0	0	0	1	0	0	0	0	0	1	0	1	3	0	3	0	1	33.3333
						B11	1	0	0	0	2	0	0	0	0	0	0	0	1	0	0	2	2	3	66.6667	2	66.6667
						B11	1	0	0	0	0	0	1	0	0	0	0	0	1	0	1	3	0	3	0	1	33.3333				61			15				9
						B11	1	1	0	0	0	0	0	0	0	1	0	2	1	0	1	5	1	6	16.6667	1	16.6667	17	0	0	44	0	11	4	0	6	0	3	8	2	10		3.15				1
						B20	1	15	2	0	0	0	0	0	0	1	0	0	0	0	7	4	17	25	68	17	68																			2	10	2
						B20	1	6	1	0	0	0	0	0	0	0	0	0	0	0	7	3	7	14	50	7	50																			2	4
						B20	1	10	6	0	0	0	0	0	0	2	0	0	0	0	5	4	16	23	69.5652	16	69.5652																				6	4
						B20	2	7	7	0	0	0	0	0	0	1	0	0	0	0	8	4	14	23	60.8696	14	60.8696																			3	4
						B20	1	3	6	0	0	0	0	0	0	1	0	0	0	0	4	4	9	14	64.2857	9	64.2857																			1	2
						B20	2	3	0	0	0	0	0	1	0	2	0	0	2	1	5	6	3	14	21.4286	4	28.5714																				3
						B20	3	9	2	0	0	0	0	0	0	4	0	0	0	0	4	4	11	19	57.8947	11	57.8947																			3	6
						B20	3	14	6	0	0	0	0	0	0	11	0	0	0	0	7	5	20	38	52.6316	20	52.6316																			2	10	1
						B20	2	5	2	0	0	0	0	0	0	3	0	0	0	1	4	5	7	15	46.6667	7	46.6667																			2	3
						B20	3	3	2	0	0	0	0	0	0	4	0	0	0	0	1	4	5	10	50	5	50																			1	2
						B20	2	5	4	0	0	0	0	0	0	2	0	0	0	2	5	5	9	18	50	9	50																				4	1
						B20	3	9	7	0	0	0	0	1	0	3	0	0	0	0	6	5	16	26	61.5385	17	65.3846																			2	6
						B20	2	4	2	0	0	0	0	0	0	3	0	0	0	0	2	4	6	11	54.5455	6	54.5455																			1	3
						B20	3	5	4	0	0	0	0	1	0	5	0	0	0	0	19	5	9	34	26.4706	10	29.4118																			1	4
						B20	2	2	0	0	0	0	0	0	0	6	0	0	1	0	7	4	2	16	12.5	2	12.5																			2
						B20	3	19	10	2	0	0	1	0	0	6	0	0	0	0	8	6	31	46	67.3913	32	69.5652																			6	10	2
						B20	3	6	6	0	0	0	0	0	0	3	0	0	1	0	2	5	12	18	66.6667	12	66.6667																			3	3
						B20	3	11	8	0	0	0	0	0	0	5	0	0	0	0	13	4	19	37	51.3514	19	51.3514																			3	5
						B20	2	1	1	0	0	0	0	0	0	6	0	0	1	0	3	5	2	12	16.6667	2	16.6667
						B20	2	0	2	0	0	0	0	0	0	2	0	0	0	0	2	3	2	6	33.3333	2	33.3333				222			4				71
						B20	2	2	3	0	0	0	0	0	0	1	0	0	0	0	2	4	5	8	62.5	5	62.5	139	81	2	0	0	1	3	0	71	0	0	5	4	121		4.42857			2
						B12	3	6	2	3	0	0	4	1	0	0	0	0	0	0	34	6	11	50	22	16	32																			3	2		1
						B12	3	2	3	0	0	0	3	1	0	2	0	0	1	1	16	8	5	29	17.2414	9	31.0345																			1			1
						B12	3	1	2	0	0	0	8	2	0	0	0	0	0	0	18	5	3	31	9.67742	13	41.9355																			1
						B12	3	10	0	0	0	0	1	4	0	0	0	0	0	0	27	4	10	42	23.8095	15	35.7143																				3		7
						B12	3	4	3	1	0	0	3	2	0	2	0	0	0	1	22	8	8	38	21.0526	13	34.2105																			1	2	1
						B12	3	14	3	2	0	0	2	3	0	0	0	0	3	0	26	7	19	53	35.8491	24	45.283																			3	1	2	8
						B12	3	8	0	2	0	0	4	2	0	0	0	1	0	0	40	6	10	57	17.5439	16	28.0702																			2			5
						B12	3	2	3	0	0	0	2	2	0	1	0	0	0	0	48	6	5	58	8.62069	9	15.5172																			2
						B12	3	5	0	0	0	0	6	0	0	2	0	0	0	1	78	5	5	92	5.43478	11	11.9565																						4
						B12	3	7	1	2	0	0	0	3	0	0	0	0	0	1	58	6	10	72	13.8889	13	18.0556																						6
						B12	3	12	2	0	0	0	1	4	0	0	0	1	0	0	36	6	14	56	25	19	33.9286																			1	2		8
						B12	3	10	0	1	0	0	3	7	0	0	0	0	0	0	35	5	11	56	19.6429	21	37.5																				4		6
						B12	3	2	1	0	0	0	1	2	0	0	0	0	0	0	19	5	3	25	12	6	24																						2
						B12	3	3	0	1	0	0	0	0	0	3	0	0	1	0	33	5	4	41	9.7561	4	9.7561																			1			2
						B12	3	8	3	2	0	0	3	1	0	0	0	0	1	0	26	7	13	44	29.5455	17	38.6364																			1			7
						B12	3	4	6	0	0	0	0	1	0	1	0	0	0	0	25	5	10	37	27.027	11	29.7297																			1			3
						B12	3	6	3	1	0	0	2	1	0	0	0	0	1	0	18	7	10	32	31.25	13	40.625																			1			5
						B12	3	6	2	1	0	0	1	0	0	0	0	0	0	0	17	5	9	27	33.3333	10	37.037																			1	3		2
						B12	3	0	3	0	0	2	1	0	0	4	0	0	0	1	16	6	3	27	11.1111	6	22.2222				172			86				18			610
						B12	3	6	3	0	0	0	2	1	0	1	0	0	1	0	18	7	9	32	28.125	12	37.5	116	40	16	0	2	47	37	0	16	0	2	8	5	610		5.95				4		2
						B13 1	1	0	1	0	0	1	1	2	0	0	0	0	0	0	0	4	1	5	20	5	100
						B13 1	1	0	0	0	0	0	2	0	0	0	0	0	0	0	0	1	0	2	0	2	100
						B13 1	1	0	0	0	0	1	1	0	0	0	0	0	0	0	0	2	0	2	0	2	100
						B13 1	1	0	0	0	0	0	1	0	0	0	0	0	0	2	0	2	0	3	0	1	33.3333
						B13 1	1	0	0	0	0	0	2	0	0	0	0	0	0	0	0	1	0	2	0	2	100
						B13 1	1	0	0	0	0	0	1	0	0	0	0	0	1	2	0	3	0	4	0	1	25
						B13 2	1	0	0	0	0	0	1	1	0	0	0	0	0	0	0	2	0	2	0	2	100
						B13 1	1	0	0	0	0	0	1	0	0	0	0	0	0	2	0	2	0	3	0	1	33.3333
						B13 1	1	0	0	0	0	0	1	0	0	0	0	0	0	0	0	1	0	1	0	1	100
						B13 1	1	0	0	0	0	0	1	0	0	1	0	0	0	0	0	2	0	2	0	1	50
						B13 1	1	0	0	0	0	0	0	1	0	1	0	0	0	3	0	3	0	5	0	1	20
						B13 1	1	0	0	0	0	0	0	0	0	1	0	0	0	1	0	2	0	2	0	0	0
						B13 1	1	0	0	0	0	0	3	0	0	0	0	0	0	1	0	2	0	4	0	3	75
						B13 1	1	0	0	0	0	0	2	0	0	0	0	0	0	0	0	1	0	2	0	2	100
						B13 1	1	0	0	0	0	0	1	0	0	0	0	0	0	2	0	2	0	3	0	1	33.3333
						B13 1	1	0	1	1	0	0	0	0	0	0	0	0	0	2	0	3	2	4	50	2	50
						B13 1	1	0	0	0	0	0	1	0	0	0	0	0	1	1	1	4	0	4	0	1	25
						B13 1	1	0	0	0	0	1	1	1	0	0	0	0	0	1	0	4	0	4	0	3	75
						B13 1	1	1	1	0	0	0	1	1	0	0	0	0	0	0	0	4	2	4	50	4	100																				1
						B13 1	1	0	0	0	0	0	1	0	0	0	0	0	0	0	0	1	0	1	0	1	100
						B13 2	1	0	0	0	0	0	3	0	0	0	0	0	0	0	6	2	0	9	0	3	33.3333
						B13 2	2	2	1	0	0	0	1	0	0	0	0	0	0	0	1	4	3	5	60	4	80																			1	1
						B13 2	1	0	0	0	0	0	1	0	0	0	0	0	0	0	1	2	0	2	0	1	50
						B13 2	1	0	0	0	0	0	1	0	0	0	0	0	0	1	1	3	0	3	0	1	33.3333
						B13 2	1	0	0	0	0	0	1	0	0	0	0	1	0	0	0	2	0	2	0	1	50
						B13 2	1	0	0	0	0	0	2	0	0	0	0	0	0	0	1	2	0	3	0	2	66.6667
						B13 2	1	0	0	0	0	0	4	2	0	0	0	0	0	0	0	2	0	6	0	6	100
						B13 2	1	1	0	0	0	0	1	0	0	0	0	0	0	1	0	3	1	3	33.3333	2	66.6667																			1
						B13 2	2	0	1	0	0	0	1	1	0	2	0	0	0	0	0	4	1	5	20	3	60
						B13 2	1	0	1	0	0	0	0	0	0	0	0	0	0	2	0	2	1	3	33.3333	1	33.3333
						B13 2	1	0	0	0	0	0	1	0	0	0	0	0	0	2	0	2	0	3	0	1	33.3333
						B13 2	1	0	1	0	0	0	2	1	0	0	0	0	0	0	0	3	1	4	25	4	100
						B13 2	1	0	0	0	0	0	2	3	0	0	0	0	0	0	0	2	0	5	0	5	100
						B13 2	1	0	0	0	0	0	1	1	0	0	0	0	0	2	0	3	0	4	0	2	50
						B13 2	1	0	2	0	0	0	0	1	0	0	0	1	0	1	0	4	2	5	40	3	60
						B13 2	1	1	0	0	0	0	0	1	0	1	0	0	0	1	0	4	1	4	25	2	50																					1
						B13 2	1	0	0	0	0	0	0	2	0	1	0	0	0	2	0	3	0	5	0	2	40
						B13 2	1	0	1	0	0	0	0	0	0	1	0	0	0	0	4	3	1	6	16.6667	1	16.6667
						B13 2	1	0	0	0	0	0	1	2	0	0	0	0	0	0	0	2	0	3	0	3	100
						B13 2	1	0	1	0	0	0	1	10	0	0	0	0	0	1	0	4	1	13	7.69231	12	92.3077
						B13 4	1	0	0	0	0	0	1	0	0	0	0	0	0	0	1	2	0	2	0	1	50
						B13 4	1	0	0	0	0	0	1	0	0	0	0	1	0	0	0	2	0	2	0	1	50
						B13 4	1	0	0	0	0	0	1	0	0	0	0	1	0	0	0	2	0	2	0	1	50
						B13 4	1	0	0	0	0	0	0	2	0	0	0	0	2	0	0	2	0	4	0	2	50
						B13 4	1	0	0	0	0	0	1	0	0	0	0	0	0	1	0	2	0	2	0	1	50
						B13 4	1	2	0	0	0	1	1	0	0	0	0	0	0	3	0	4	2	7	28.5714	4	57.1429																					2
						B13 4	1	3	0	0	0	0	1	2	0	0	0	0	0	2	0	4	3	8	37.5	6	75																					3
						B13 4	1	2	0	0	0	0	1	0	0	0	0	0	0	0	0	2	2	3	66.6667	3	100																					2
						B13 4	1	2	0	0	0	0	0	0	0	0	0	1	1	0	0	3	2	4	50	2	50																					2
						B13 4	1	0	0	0	0	0	1	0	0	0	0	1	0	0	0	2	0	2	0	1	50
						B13 4	1	1	0	0	0	0	1	0	0	0	0	0	0	0	0	2	1	2	50	2	100																					1
						B13 4	1	0	0	0	0	0	2	1	0	0	0	0	0	0	0	2	0	3	0	3	100
						B13 4	1	1	1	0	0	0	0	2	0	0	0	0	1	0	0	4	2	5	40	4	80																					1
						B13 4	1	0	0	0	0	0	1	0	0	0	0	0	0	3	1	3	0	5	0	1	20
						B13 4	1	0	0	0	0	0	1	0	0	0	0	0	0	3	0	2	0	4	0	1	25
						B13 4	1	0	0	0	0	0	1	0	0	0	0	0	0	0	0	1	0	1	0	1	100
						B13 4	1	0	1	0	0	0	1	0	0	0	0	0	0	1	0	3	1	3	33.3333	2	66.6667
						B13 4	1	0	0	0	0	0	1	0	0	0	0	0	0	1	0	2	0	2	0	1	50
						B13 5	1	0	0	0	0	0	0	3	0	0	0	0	0	2	0	2	0	5	0	3	60
						B13 5	1	0	0	0	0	0	0	0	0	0	0	1	1	1	0	3	0	3	0	0	0
						B13 5	1	0	0	0	0	1	0	1	0	0	0	1	0	3	1	4	0	7	0	2	28.5714
						B13 5	1	0	0	0	0	0	0	0	0	0	0	0	0	1	0	1	0	1	0	0	0
						B13 5	1	0	2	0	0	0	0	0	0	0	0	0	0	2	0	2	2	4	50	2	50
						B13 5	1	0	0	0	0	0	2	1	0	0	0	0	0	0	0	2	0	3	0	3	100
						B13 5	1	0	0	0	0	0	1	0	0	1	0	0	0	1	1	4	0	4	0	1	25
						B13 5	1	0	0	0	0	0	1	1	0	0	0	0	0	1	0	3	0	3	0	2	66.6667
						B13 5	1	0	0	0	0	0	0	2	0	0	0	0	0	1	2	3	0	5	0	2	40
						B13 5	1	0	0	0	0	0	1	4	0	0	0	0	0	1	0	3	0	6	0	5	83.3333
						B13 5	1	1	0	0	0	0	3	0	0	3	0	0	0	1	0	4	1	8	12.5	4	50																					1
						B13 5	1	0	0	0	0	0	3	1	0	0	0	0	0	1	1	4	0	6	0	4	66.6667
						B13 5	1	0	1	0	0	0	1	0	0	0	0	0	0	1	0	3	1	3	33.3333	2	66.6667
						B13 5	1	0	0	0	0	0	2	0	0	0	0	0	0	1	0	2	0	3	0	2	66.6667
						B13 5	1	0	0	0	0	0	1	0	0	0	0	0	1	0	0	2	0	2	0	1	50
						B13 5	1	1	0	0	0	0	3	1	0	0	0	0	0	0	1	4	1	6	16.6667	5	83.3333																		0.0128205			1
						B13 5	1	0	1	0	0	0	1	0	0	0	0	0	1	0	0	3	1	3	33.3333	2	66.6667																		0.0512821
						B13 5	1	1	0	0	0	0	1	1	0	0	0	0	0	0	0	3	1	3	33.3333	3	100																		0.371795			1
						B13 5	1	0	0	0	0	0	3	0	0	0	0	1	0	0	0	2	0	4	0	3	75				37			142				22		73			0.930574		0.192308
						B13 5	1	0	0	0	0	0	1	0	0	0	0	1	0	3	0	3	0	5	0	1	20	19	17	1	0	5	85	52	0	12	0	10	9	64	23		2.60256		0.371795
						B15 1	1	1	0	0	0	0	0	2	0	0	0	0	0	0	0	2	1	3	33.3333	3	100																				1
						B15 1	1	0	0	0	0	1	1	1	0	0	0	1	0	0	5	5	0	9	0	3	33.3333
						B15 1	1	0	0	0	0	0	1	0	0	0	0	0	0	4	3	3	0	8	0	1	12.5
						B15 1	1	1	0	0	0	0	0	0	0	1	0	0	0	1	3	4	1	6	16.6667	1	16.6667																				1
						B15 1	1	1	0	0	0	0	0	1	0	0	0	0	0	3	4	4	1	9	11.1111	2	22.2222																				1
						B15 1	1	0	0	0	0	0	0	0	0	1	0	0	1	1	1	4	0	4	0	0	0
						B15 1	1	1	0	0	0	0	0	0	0	0	0	0	0	1	3	3	1	5	20	1	20																				1
						B15 1	1	0	0	0	0	0	2	0	0	0	0	0	0	0	1	2	0	3	0	2	66.6667
						B15 1	1	0	0	0	0	0	1	1	0	0	0	0	0	0	1	3	0	3	0	2	66.6667
						B15 1	1	0	0	0	0	0	1	0	0	0	0	1	0	0	3	3	0	5	0	1	20
						B15 1	1	0	0	0	0	0	0	0	0	1	0	0	0	2	1	3	0	4	0	0	0
						B15 1	1	0	0	0	0	0	1	2	0	0	0	0	0	1	1	4	0	5	0	3	60
						B15 1	1	0	0	0	0	0	1	0	0	0	0	0	0	2	2	3	0	5	0	1	20
						B15 1	1	0	0	0	0	0	1	0	0	0	0	0	0	1	0	2	0	2	0	1	50
						B15 1	1	0	0	0	0	0	0	0	0	0	0	0	1	1	2	3	0	4	0	0	0
						B15 1	1	0	0	0	0	0	0	0	0	0	0	1	0	2	1	3	0	4	0	0	0
						B15 1	1	0	0	0	0	0	1	0	0	0	0	0	0	0	1	2	0	2	0	1	50
						B15 1	1	1	0	0	0	0	1	0	0	1	0	0	0	0	1	4	1	4	25	2	50																				1
						B15 1	1	1	0	0	0	1	1	0	0	0	0	0	0	2	1	5	1	6	16.6667	3	50																					1
						B15 1	1	0	0	0	0	0	1	0	0	0	0	0	0	2	1	3	0	4	0	1	25
						B15 10	1	0	0	0	0	0	1	0	0	1	0	0	0	0	4	3	0	6	0	1	16.6667
						B15 10	1	0	0	0	0	0	1	0	0	1	0	0	0	2	0	3	0	4	0	1	25
						B15 10	1	0	0	0	0	0	2	1	0	0	0	0	0	6	1	4	0	10	0	3	30
						B15 10	1	1	0	0	0	0	1	0	0	0	0	0	1	1	0	4	1	4	25	2	50																				1
						B15 10	1	0	0	0	0	0	0	1	0	0	0	0	0	1	2	3	0	4	0	1	25
						B15 10	1	0	1	0	0	0	1	0	0	0	0	0	0	1	1	4	1	4	25	2	50
						B15 10	1	0	0	0	0	0	0	0	0	0	0	0	0	1	2	2	0	3	0	0	0
						B15 10	1	1	0	0	0	0	0	0	0	1	0	0	1	0	2	4	1	5	20	1	20																				1
						B15 10	1	0	0	0	0	0	1	2	0	1	0	0	0	0	1	4	0	5	0	3	60
						B15 10	1	0	0	0	0	0	0	0	0	1	0	0	1	0	1	3	0	3	0	0	0
						B15 10	1	0	0	0	0	0	1	0	0	0	0	0	0	2	0	2	0	3	0	1	33.3333
						B15 10	1	0	0	0	0	0	0	0	0	0	0	0	0	1	2	2	0	3	0	0	0
						B15 10	1	0	0	0	0	0	2	0	0	0	0	0	0	1	2	3	0	5	0	2	40
						B15 10	1	0	0	0	0	0	0	0	0	1	0	0	0	0	2	2	0	3	0	0	0
						B15 10	1	1	0	0	0	0	0	1	0	2	0	0	0	2	2	5	1	8	12.5	2	25
						B15 10	1	0	0	0	0	0	1	0	0	0	0	0	1	1	3	4	0	6	0	1	16.6667
						B15 10	1	0	0	0	0	0	1	0	0	1	0	0	0	2	0	3	0	4	0	1	25
						B15 10	1	0	0	0	0	0	2	0	0	0	0	0	0	3	3	3	0	8	0	2	25
						B15 10	1	0	0	0	0	0	2	0	0	0	0	0	0	5	4	3	0	11	0	2	18.1818
						B15 11	1	0	0	0	0	0	0	0	0	0	0	0	2	2	1	3	0	5	0	0	0
						B15 12	1	0	0	0	0	0	2	1	0	0	0	0	0	0	2	3	0	5	0	3	60
						B15 12	1	0	0	0	0	0	1	0	0	0	0	0	0	1	1	3	0	3	0	1	33.3333
						B15 12	1	0	0	0	0	0	1	0	0	0	0	0	0	2	0	2	0	3	0	1	33.3333
						B15 12	1	0	0	0	0	0	2	0	0	2	0	0	0	3	1	4	0	8	0	2	25
						B15 12	1	0	1	0	0	0	1	0	0	0	0	0	0	3	2	3	1	7	14.2857	2	28.5714
						B15 12	1	0	0	1	0	0	1	0	0	0	0	0	0	2	3	4	1	7	14.2857	2	28.5714
						B15 12	1	0	0	0	0	0	0	0	0	0	0	0	2	1	1	3	0	4	0	0	0
						B15 12	1	0	0	0	0	0	0	1	0	0	0	0	0	3	1	3	0	5	0	1	20
						B15 12	1	0	0	0	0	0	2	0	0	0	0	0	0	0	0	1	0	2	0	2	100
						B15 12	1	0	0	0	0	0	0	0	0	1	0	0	0	2	1	3	0	4	0	0	0
						B15 12	1	0	0	0	0	0	1	0	0	0	0	1	0	0	0	2	0	2	0	1	50
						B15 12	1	1	0	0	0	0	0	0	0	2	0	0	0	3	2	4	1	8	12.5	1	12.5																			1
						B15 12	1	0	0	0	0	0	1	0	0	0	0	0	0	0	2	2	0	3	0	1	33.3333
						B15 12	1	0	0	0	0	0	1	0	0	1	0	0	0	0	2	3	0	4	0	1	25
						B15 12	1	0	0	0	0	0	0	0	0	2	0	0	1	1	4	4	0	8	0	0	0
						B15 12	1	0	0	0	0	0	2	0	0	0	0	0	0	1	3	3	0	6	0	2	33.3333
						B15 12	1	0	0	0	0	0	0	0	0	1	0	0	0	1	2	3	0	4	0	0	0
						B15 12	1	0	0	0	0	0	1	0	0	1	0	0	1	2	2	5	0	7	0	1	14.2857
						B15 12	1	1	0	0	0	0	1	0	0	0	0	0	0	2	2	4	1	6	16.6667	2	33.3333																			1
						B15 12	1	0	0	0	0	0	0	0	0	0	0	0	0	3	2	2	0	5	0	0	0
						B15 11	1	0	0	0	0	0	1	0	1	1	0	0	1	1	0	5	0	5	0	2	40
						B15 11	1	0	0	0	0	0	1	0	0	0	0	0	0	2	1	3	0	4	0	1	25
						B15 11	1	0	0	0	0	0	1	0	0	0	0	0	0	1	3	3	0	5	0	1	20
						B15 11	1	0	0	0	0	0	0	0	0	1	0	0	0	3	1	3	0	5	0	0	0
						B15 11	1	0	0	0	0	0	2	0	0	1	0	0	0	0	3	3	0	6	0	2	33.3333
						B15 11	1	0	0	0	0	0	0	0	0	0	0	0	0	1	3	2	0	4	0	0	0
						B15 11	1	0	0	0	0	0	1	0	0	0	0	0	0	1	4	3	0	6	0	1	16.6667
						B15 11	1	1	0	0	0	0	0	0	0	0	0	0	0	1	0	2	1	2	50	1	50																			1
						B15 11	1	1	0	0	0	0	1	0	0	0	0	0	0	0	1	3	1	3	33.3333	2	66.6667																				1
						B15 11	1	0	0	0	0	0	0	0	0	1	0	0	0	2	3	3	0	6	0	0	0
						B15 11	1	0	1	0	0	0	1	1	0	0	0	0	0	1	3	5	1	7	14.2857	3	42.8571
						B15 11	1	0	1	0	0	0	0	0	0	0	0	1	0	0	2	3	1	4	25	1	25
						B15 11	1	0	0	0	0	0	1	0	0	0	0	0	0	3	0	2	0	4	0	1	25
						B15 11	1	0	0	0	0	0	0	0	0	1	0	0	0	1	2	3	0	4	0	0	0
						B15 11	1	0	0	0	0	0	1	0	0	0	0	0	0	0	2	2	0	3	0	1	33.3333
						B15 11	1	0	0	1	0	0	0	0	0	1	0	1	0	0	1	4	1	4	25	1	25
						B15 11	1	0	0	0	0	0	0	1	0	1	0	0	0	1	0	3	0	3	0	1	33.3333																		0.0886076
						B15 11	1	0	1	0	0	0	0	1	0	0	0	0	0	0	1	3	1	3	33.3333	2	66.6667																		0.329114
						B15 11	1	1	0	0	0	0	0	0	0	1	0	0	1	1	2	5	1	6	16.6667	1	16.6667				22			75				38		119	135		0.8969		0.341772	1
						B15 11	1	0	1	0	0	0	0	0	0	0	0	1	0	2	2	4	1	6	16.6667	1	16.6667	14	6	2	0	2	56	17	1	31	0	7	14	105	135		3.175		0.253165
						B16 1	1	1	3	0	0	0	28	0	0	2	0	0	0	1	8	5	4	43	9.30233	32	74.4186																					1
						B16 1	1	0	0	0	0	0	18	0	0	3	0	1	0	2	14	5	0	38	0	18	47.3684
						B16 1	1	0	1	0	0	0	20	0	0	0	0	0	0	1	11	4	1	33	3.0303	21	63.6364
						B16 1	1	0	0	0	0	0	21	0	0	3	0	0	0	1	7	4	0	32	0	21	65.625
						B16 1	1	0	0	0	0	0	15	0	0	1	0	0	0	0	16	3	0	32	0	15	46.875
						B16 1	1	1	1	0	0	0	9	0	0	3	0	0	0	0	7	5	2	21	9.52381	11	52.381																			1
						B16 1	1	0	2	0	0	0	17	0	0	5	0	0	1	0	16	5	2	41	4.87805	19	46.3415
						B16 1	1	0	0	0	0	0	12	0	0	3	0	0	0	0	16	3	0	31	0	12	38.7097
						B16 1	1	0	0	0	0	1	14	0	0	3	0	0	0	1	9	5	0	28	0	15	53.5714
						B16 1	1	1	0	0	0	0	13	0	0	4	0	1	0	1	15	6	1	35	2.85714	14	40																			1
						B16 1	1	0	1	0	0	0	9	0	0	1	0	1	1	0	13	6	1	26	3.84615	10	38.4615
						B16 1	1	0	1	0	0	0	9	0	0	4	0	0	0	0	10	4	1	24	4.16667	10	41.6667
						B16 1	1	0	1	1	0	0	15	0	0	1	0	0	0	0	13	5	2	31	6.45161	17	54.8387
						B16 1	1	1	2	0	0	0	0	0	0	3	0	0	0	0	14	4	3	20	15	3	15																			1
						B16 1	1	0	0	0	0	0	10	1	0	2	0	0	0	0	14	4	0	27	0	11	40.7407
						B16 1	1	0	0	0	0	0	9	0	0	2	0	0	1	1	14	5	0	27	0	9	33.3333
						B16 1	1	0	0	0	0	0	7	1	0	2	0	1	1	1	14	7	0	27	0	8	29.6296
						B16 1	1	1	0	0	0	0	0	0	0	0	0	0	0	0	13	2	1	14	7.14286	1	7.14286																			1
						B16 1	1	2	1	0	0	0	11	0	0	5	0	0	0	0	11	5	3	30	10	14	46.6667																				1	1
						B16 1	1	0	0	0	0	0	5	0	0	4	0	0	0	0	14	3	0	23	0	5	21.7391
						B16 2	1	1	1	0	0	0	4	0	0	0	0	0	0	2	6	5	2	14	14.2857	6	42.8571																			1
						B16 2	1	0	0	0	0	0	3	0	0	1	0	0	0	1	2	4	0	7	0	3	42.8571
						B16 2	1	1	0	0	0	0	6	0	0	1	0	0	0	0	0	3	1	8	12.5	7	87.5																			1
						B16 2	1	1	0	0	0	0	0	0	0	1	0	0	0	0	2	3	1	4	25	1	25																			1
						B16 2	1	0	0	0	0	0	3	0	0	4	0	0	1	3	1	5	0	12	0	3	25
						B16 2	1	0	0	0	0	0	2	0	0	2	0	0	0	1	1	4	0	6	0	2	33.3333
						B16 2	1	1	3	0	0	0	0	0	0	4	0	1	0	0	6	5	4	15	26.6667	4	26.6667																					1
						B16 2	1	1	1	0	0	0	4	0	0	1	0	0	0	4	1	6	2	12	16.6667	6	50																					1
						B16 2	1	0	0	0	0	0	3	0	0	3	0	0	0	4	1	4	0	11	0	3	27.2727
						B16 2	1	0	1	0	0	0	2	0	0	4	0	0	0	0	3	4	1	10	10	3	30
						B16 2	1	1	0	0	0	0	0	0	0	1	0	0	0	1	3	4	1	6	16.6667	1	16.6667																			1
						B16 2	1	0	1	0	0	0	2	0	0	4	0	0	0	0	1	4	1	8	12.5	3	37.5
						B16 2	1	0	0	0	0	0	6	0	0	2	0	0	0	1	1	4	0	10	0	6	60
						B16 2	1	0	0	0	0	0	0	0	0	4	0	0	1	1	6	4	0	12	0	0	0
						B16 2	1	0	1	0	0	0	2	0	0	2	0	0	0	1	2	4	1	8	12.5	3	37.5
						B16 2	1	0	1	0	0	0	0	0	0	2	0	0	0	1	2	4	1	6	16.6667	1	16.6667
						B16 2	1	0	1	0	0	0	2	0	0	1	0	0	0	0	3	4	1	7	14.2857	3	42.8571
						B16 2	1	0	3	0	0	0	4	0	0	1	0	0	0	1	0	4	3	9	33.3333	7	77.7778
						B16 2	1	0	0	0	0	0	3	0	0	1	0	1	0	1	1	5	0	7	0	3	42.8571
						B16 2	1	0	0	0	0	0	5	0	0	2	0	0	0	1	3	4	0	11	0	5	45.4545
						B16 5	1	0	0	0	0	0	1	0	0	2	0	0	0	3	3	4	0	9	0	1	11.1111
						B16 5	1	1	1	0	0	0	0	0	0	2	0	0	0	0	2	4	2	6	33.3333	2	33.3333																			1
						B16 5	1	1	1	0	0	0	8	0	0	5	0	0	0	0	3	5	2	18	11.1111	10	55.5556																			1
						B16 5	1	0	0	0	0	0	4	0	0	0	0	0	0	2	3	3	0	9	0	4	44.4444																		0.0208333
						B16 5	1	0	0	0	0	0	2	0	0	3	0	0	0	4	4	4	0	13	0	2	15.3846																		0.3125
						B16 5	1	0	0	0	0	0	0	0	0	4	0	0	0	2	5	3	0	11	0	0	0																		0.4375
						B16 5	1	0	0	0	0	0	0	0	0	2	0	0	0	2	5	3	0	9	0	0	0																		0.0833333
						B16 5	1	0	0	0	0	0	0	0	0	4	0	0	0	6	3	3	0	13	0	0	0				45			311	1			125		57	328		0.963183
						B16 5	1	1	0	0	0	0	0	0	0	4	0	1	0	0	6	4	1	12	8.33333	1	8.33333	16	28	1	0	1	308	2	1	118	0	7	6	51	328		4.22449		0.166667	1
						B17 1	1	1	2	0	0	0	1	0	0	5	0	0	0	1	1	6	3	11	27.2727	4	36.3636																			1
						B17 1	1	1	4	0	0	0	0	0	0	8	0	0	1	1	0	5	5	15	33.3333	5	33.3333																			1
						B17 2	1	0	2	0	0	0	1	0	0	6	0	0	0	1	1	5	2	11	18.1818	3	27.2727
						B17 2	1	0	1	0	0	0	2	0	0	9	0	0	1	1	0	5	1	14	7.14286	3	21.4286
						B17 2	3	9	11	0	0	0	1	0	0	6	1	0	0	1	4	7	20	33	60.6061	21	63.6364																			4		2
						B17 2	1	0	0	0	0	0	3	0	0	2	0	0	0	0	0	2	0	5	0	3	60
						B17 2	1	2	1	0	0	0	3	0	0	0	0	0	0	0	2	4	3	8	37.5	6	75																			2
						B17 2	1	0	6	0	0	0	1	0	0	3	0	0	0	1	2	5	6	13	46.1538	7	53.8462
						B17 2	1	0	0	0	0	0	0	0	0	4	0	0	0	0	1	2	0	5	0	0	0
						B17 2	1	0	0	0	0	0	2	0	0	4	0	0	0	0	1	3	0	7	0	2	28.5714
						B17 2	1	2	4	0	0	0	0	0	0	4	0	0	1	0	2	5	6	13	46.1538	6	46.1538																			2
						B17 2	1	0	1	0	0	0	1	0	0	0	0	0	0	2	1	3	1	5	20	2	40
						B17 2	1	1	1	0	0	0	1	0	0	3	0	0	0	2	0	5	2	8	25	3	37.5																			1
						B17 3	2	2	2	0	0	0	9	0	0	1	0	0	0	1	1	6	4	16	25	13	81.25																			1
						B17 3	1	2	0	0	0	0	1	1	0	4	0	0	0	0	0	4	2	8	25	4	50																			2
						B17 3	1	0	2	0	0	0	3	0	0	4	0	0	0	0	1	4	2	10	20	5	50
						B17 3	1	0	1	0	0	0	2	0	0	2	0	0	1	1	2	6	1	9	11.1111	3	33.3333
						B17 3	1	1	0	0	0	0	5	0	0	4	0	1	0	0	1	5	1	12	8.33333	6	50																			1
						B17 3	3	6	10	0	0	0	3	0	0	3	2	0	1	1	1	8	16	27	59.2593	19	70.3704																			1	3	2
						B17 3	2	0	3	0	0	0	1	0	0	3	0	0	0	0	2	4	3	9	33.3333	4	44.4444
						B17 3	1	0	1	0	0	0	3	0	0	4	0	0	0	0	1	4	1	9	11.1111	4	44.4444
						B17 3	1	0	0	0	0	0	1	0	0	1	0	0	0	1	1	4	0	4	0	1	25
						B17 3	1	1	0	0	0	0	22	0	0	1	0	0	0	1	0	4	1	25	4	23	92																			1
						B17 3	2	6	3	1	0	0	0	0	0	3	0	0	0	2	2	6	10	17	58.8235	10	58.8235																				5
						B17 3	1	0	0	0	0	0	1	0	0	2	0	0	2	2	1	5	0	8	0	1	12.5
						B17 3	1	0	1	0	0	0	1	0	0	4	0	0	0	1	0	4	1	7	14.2857	2	28.5714
						B17 3	1	0	1	0	0	0	0	0	1	1	0	0	0	0	0	3	1	3	33.3333	2	66.6667
						B17 3	1	0	2	0	0	0	0	0	0	2	0	0	0	0	0	2	2	4	50	2	50
						B17 3	3	6	4	0	0	0	1	1	0	2	15	0	1	0	2	8	10	32	31.25	12	37.5																				6
						B17 3	1	1	0	0	0	0	0	0	0	4	0	0	0	0	3	3	1	8	12.5	1	12.5																			1
						B17 3	1	0	1	0	0	0	4	0	0	4	0	0	0	0	1	4	1	10	10	5	50
						B17 3	1	1	1	0	0	0	4	0	0	5	0	0	0	0	0	4	2	11	18.1818	6	54.5455																			1
						B17 3	3	3	2	0	0	0	4	0	0	0	4	0	0	0	5	5	5	18	27.7778	9	50																				3
						B17 4	1	0	2	0	0	0	1	0	0	3	0	0	0	2	5	5	2	13	15.3846	3	23.0769
						B17 4	1	1	2	0	0	0	2	0	0	2	0	0	0	0	1	5	3	8	37.5	5	62.5																			1
						B17 4	1	0	0	0	0	0	16	0	0	5	0	0	0	0	4	3	0	25	0	16	64
						B17 4	1	0	0	0	0	0	7	0	0	3	0	0	0	0	0	2	0	10	0	7	70
						B17 4	2	3	0	0	0	0	1	0	0	3	0	0	0	2	6	5	3	15	20	4	26.6667																			3
						B17 4	1	0	6	0	0	0	6	0	0	2	0	0	0	0	0	2	6	14	42.8571	12	85.7143
						B17 4	1	0	0	0	0	0	4	0	0	1	0	0	0	0	1	3	0	6	0	4	66.6667
						B17 4	1	1	0	0	0	0	5	0	0	2	0	0	0	0	0	3	1	8	12.5	6	75																			1
						B17 4	1	0	0	0	0	0	3	0	0	5	0	0	0	0	2	3	0	10	0	3	30
						B17 4	1	1	0	0	0	0	2	0	0	1	0	0	0	0	0	3	1	4	25	3	75																			1
						B17 4	1	0	0	0	0	0	3	0	0	1	0	0	0	2	0	3	0	6	0	3	50
						B17 4	1	0	4	0	0	0	0	0	0	3	0	0	0	0	1	3	4	8	50	4	50
						B17 4	1	0	0	0	0	0	3	0	0	1	0	0	0	0	0	2	0	4	0	3	75
						B17 4	1	0	0	0	0	1	5	0	0	2	0	0	0	1	0	4	0	9	0	6	66.6667
						B17 4	1	0	1	0	0	0	2	0	0	1	0	0	1	1	3	6	1	9	11.1111	3	33.3333
						B17 4	1	0	0	0	0	0	1	1	0	4	0	0	0	0	0	3	0	6	0	2	33.3333
						B17 4	1	0	4	0	0	0	0	0	0	1	0	0	0	1	0	3	4	6	66.6667	4	66.6667
						B17 4	1	0	2	0	0	0	1	0	0	2	0	0	0	1	3	5	2	9	22.2222	3	33.3333
						B17 4	2	2	3	0	0	0	0	0	0	3	0	0	1	0	0	4	5	9	55.5556	5	55.5556																			2
						B17 4	1	0	1	0	0	0	3	0	0	2	0	0	0	0	0	3	1	6	16.6667	4	66.6667
						B17 5	3	4	6	0	0	0	3	0	0	6	0	0	0	0	2	5	10	21	47.619	13	61.9048																			3
						B17 5	2	3	5	0	0	0	2	0	0	7	0	0	0	0	2	5	8	19	42.1053	10	52.6316																			3
						B17 5	1	5	0	0	0	0	3	0	0	6	0	0	0	0	2	4	5	16	31.25	8	50																			5
						B17 5	3	4	2	0	0	0	4	0	0	8	0	1	0	0	2	6	6	21	28.5714	10	47.619																			3
						B17 5	2	1	0	0	0	0	2	0	0	4	0	0	0	0	3	4	1	10	10	3	30																			1
						B17 5	2	1	1	0	0	0	2	0	0	6	0	0	0	0	1	5	2	11	18.1818	4	36.3636
						B17 5	2	2	2	0	0	0	2	0	0	3	0	0	1	0	1	6	4	11	36.3636	6	54.5455																			1		1
						B17 5	2	1	0	0	0	0	1	0	0	8	0	0	0	0	1	3	1	11	9.09091	2	18.1818
						B17 5	2	6	1	0	0	0	2	0	0	10	0	0	0	0	0	4	7	19	36.8421	9	47.3684																			6
						B17 5	2	1	2	0	0	0	0	0	0	8	0	0	0	1	0	4	3	12	25	3	25																			1
						B17 5	2	4	1	0	0	0	1	0	0	8	0	0	0	0	3	5	5	17	29.4118	6	35.2941																			1	3
						B17 5	2	2	4	0	0	0	1	0	0	2	0	0	0	0	3	5	6	12	50	7	58.3333																			2
						B17 5	2	0	3	0	0	0	1	0	0	5	0	0	0	0	3	4	3	12	25	4	33.3333
						B17 5	2	1	2	0	0	0	2	0	0	6	0	0	0	0	1	5	3	12	25	5	41.6667																			1
						B17 5	2	1	4	0	0	0	2	0	0	5	0	0	1	0	2	6	5	15	33.3333	7	46.6667																		0.0273973	1
						B17 5	2	1	2	0	0	0	2	0	0	6	0	0	0	2	2	6	3	15	20	5	33.3333																		0.178082	1
						B17 5	2	1	7	0	0	0	2	0	0	10	0	0	0	0	4	5	8	24	33.3333	10	41.6667																		0.0547945	1
						B17 5	2	2	4	0	0	0	3	0	0	8	0	0	1	0	2	6	6	20	30	9	45																		0.424658	2
						B17 5	2	0	2	0	0	0	2	0	0	8	0	0	0	0	1	4	2	13	15.3846	4	30.7692				235			189				309		47	101		1.35625		0.178082
						B17 5	2	1	0	0	0	0	2	0	0	6	0	0	0	1	1	5	1	11	9.09091	3	27.2727	94	140	1	0	1	185	3	1	285	22	2	13	34	101		4.34247		0.136986	1
						B14 4	1	0	0	0	0	0	0	0	0	0	0	0	0	1	2	2	0	3	0	0	0
						B14 4	1	0	0	0	0	0	1	0	0	0	0	0	0	1	1	3	0	3	0	1	33.3333
						B14 4	1	0	0	0	0	0	1	0	0	0	0	0	0	5	0	2	0	6	0	1	16.6667
						B14 4	1	0	0	0	0	0	2	0	0	0	0	0	1	0	3	3	0	6	0	2	33.3333
						B14 4	1	0	1	0	0	0	1	0	0	0	0	0	0	1	3	4	1	6	16.6667	2	33.3333
						B14 4	1	0	0	0	0	0	3	1	0	0	0	0	1	0	1	4	0	6	0	4	66.6667
						B14 4	1	0	1	0	0	0	0	0	0	1	0	0	1	0	2	4	1	5	20	1	20
						B14 4	1	0	0	0	0	0	5	0	0	0	0	1	0	1	5	4	0	12	0	5	41.6667
						B14 4	1	0	0	0	0	0	1	0	0	0	0	0	0	0	2	2	0	3	0	1	33.3333
						B14 4	1	0	0	0	0	0	1	0	0	1	0	0	0	1	1	4	0	4	0	1	25
						B14 4	1	0	0	0	0	0	1	0	0	1	0	0	0	1	0	2	0	3	0	1	33.3333
						B14 4	1	0	2	0	0	0	0	0	0	0	0	0	0	2	0	2	2	4	50	2	50
						B14 4	1	0	0	0	0	0	2	0	0	0	0	0	0	3	1	3	0	6	0	2	33.3333
						B14 4	1	0	1	0	0	0	0	0	0	0	0	0	0	1	2	3	1	4	25	1	25
						B14 4	1	0	0	0	0	0	1	0	0	1	0	0	0	1	3	4	0	6	0	1	16.6667
						B14 4	1	0	1	0	0	0	2	0	0	1	0	0	0	0	0	3	1	4	25	3	75
						B14 4	1	0	1	0	0	0	1	0	0	1	0	0	0	1	2	5	1	6	16.6667	2	33.3333
						B14 4	1	0	0	0	0	0	1	0	0	1	0	0	1	2	2	5	0	7	0	1	14.2857
						B14 4	1	0	0	0	0	0	0	1	0	1	0	0	0	1	0	3	0	3	0	1	33.3333
						B14 4	1	0	0	0	0	0	1	0	0	0	0	0	1	1	1	4	0	4	0	1	25
						B14 1	1	0	0	0	0	0	1	1	0	0	0	0	2	0	0	3	0	4	0	2	50
						B14 1	1	0	0	0	0	0	3	0	0	1	0	0	0	2	2	4	0	8	0	3	37.5
						B14 1	1	0	0	0	0	0	0	0	0	0	0	0	3	0	1	2	0	4	0	0	0
						B14 1	1	0	0	0	0	0	3	0	0	0	0	0	0	2	0	2	0	5	0	3	60
						B14 1	1	0	0	0	0	0	1	0	0	2	0	0	0	0	1	3	0	4	0	1	25
						B14 1	1	0	0	0	0	0	1	0	0	0	0	0	2	0	0	2	0	3	0	1	33.3333
						B14 1	1	0	0	0	0	0	0	0	0	0	0	0	0	1	1	2	0	2	0	0	0
						B14 1	1	0	0	0	0	0	2	0	0	0	0	0	0	0	2	2	0	4	0	2	50
						B14 1	1	0	0	0	0	0	1	0	0	0	0	0	0	1	1	3	0	3	0	1	33.3333
						B14 1	1	0	0	0	0	0	2	0	0	0	0	0	1	0	2	3	0	5	0	2	40
						B14 1	1	0	1	0	0	0	1	0	0	1	0	0	0	1	0	4	1	4	25	2	50
						B14 1	1	2	0	0	0	0	0	0	0	1	0	0	0	2	2	3	2	7	28.5714	2	28.5714																					1
						B14 1	1	0	0	0	0	0	1	0	0	0	0	0	1	1	1	4	0	4	0	1	25
						B14 1	1	0	0	0	0	0	3	0	0	0	0	0	0	2	1	3	0	6	0	3	50
						B14 1	1	0	1	0	0	0	2	0	0	1	0	0	0	0	0	3	1	4	25	3	75
						B14 1	1	0	0	0	0	0	2	0	0	0	0	0	0	0	0	1	0	2	0	2	100
						B14 1	1	0	0	0	0	0	1	0	0	0	0	0	2	3	0	3	0	6	0	1	16.6667
						B14 1	1	0	0	0	0	0	0	1	0	0	0	0	0	1	0	2	0	2	0	1	50
						B14 1	1	0	0	0	0	0	1	0	0	0	0	0	0	0	0	1	0	1	0	1	100
						B14 2	1	0	0	0	0	0	0	1	0	0	0	0	0	1	1	3	0	3	0	1	33.3333
						B14 2	1	0	0	0	0	0	1	1	0	0	0	0	0	1	3	4	0	6	0	2	33.3333
						B14 2	1	0	0	0	0	0	1	1	0	0	0	0	0	0	0	2	0	2	0	2	100
						B14 2	1	0	0	0	0	0	1	0	0	0	0	0	0	3	2	3	0	6	0	1	16.6667
						B14 2	1	0	0	0	0	0	3	0	0	0	0	0	0	0	4	2	0	7	0	3	42.8571
						B14 2	1	0	0	0	0	0	1	1	0	0	0	0	1	0	0	3	0	3	0	2	66.6667
						B14 2	1	0	0	0	0	0	1	0	0	0	0	0	0	1	0	2	0	2	0	1	50
						B14 2	1	0	0	0	0	0	2	0	0	0	0	0	0	0	2	2	0	4	0	2	50
						B14 2	1	0	0	0	0	0	3	0	0	1	0	0	0	1	0	3	0	5	0	3	60
						B14 2	1	0	1	0	0	0	0	0	0	1	0	0	1	0	3	3	1	6	16.6667	1	16.6667
						B14 2	1	0	0	0	0	0	1	0	0	0	0	0	0	2	0	2	0	3	0	1	33.3333
						B14 2	1	0	1	0	0	0	1	0	0	0	0	0	0	4	1	4	1	7	14.2857	2	28.5714
						B14 2	1	0	0	0	0	0	2	0	0	0	0	0	0	3	1	3	0	6	0	2	33.3333
						B14 2	1	0	0	0	0	0	3	0	0	0	0	0	0	3	1	3	0	7	0	3	42.8571
						B14 2	1	0	0	0	0	0	2	0	0	1	0	0	0	0	4	3	0	7	0	2	28.5714																		0.20339
						B14 2	1	0	0	0	0	0	2	0	0	0	0	0	0	1	2	3	0	5	0	2	40																		0.237288
						B14 2	1	0	1	0	0	0	3	0	0	1	0	0	1	0	2	5	1	8	12.5	4	50																		0.186441
						B14 2	1	0	0	0	0	0	1	0	0	0	0	0	0	1	0	2	0	2	0	1	50																		0.0169492
						B14 2	1	0	0	0	0	0	2	0	0	0	0	0	0	1	0	2	0	3	0	2	66.6667				14			89				19		82	71		0.933812
						B14 2	1	0	0	0	0	0	2	0	0	0	0	0	0	2	0	2	0	4	0	2	50	2	12	0	0	0	81	8	0	18	0	1	19	63	71		2.91525		0.355932
						B7 1	1	0	0	0	0	0	8	1	0	0	0	0	0	2	0	3	0	11	0	9	81.8182
						B7 1	1	0	0	0	0	0	2	1	0	0	0	0	0	0	0	2	0	3	0	3	100
						B7 1	1	0	1	0	0	0	20	0	0	2	0	0	0	0	0	3	1	23	4.34783	21	91.3043
						B7 1	1	0	0	0	0	0	10	0	0	2	0	0	0	1	0	3	0	13	0	10	76.9231
						B7 1	1	0	0	0	0	0	4	1	0	0	0	0	0	1	0	3	0	6	0	5	83.3333
						B7 1	1	0	0	0	0	0	3	1	0	0	0	0	0	1	0	3	0	5	0	4	80
						B7 1	1	0	0	0	0	0	11	0	0	0	0	0	0	0	0	1	0	11	0	11	100
						B7 1	1	0	2	0	0	0	13	0	0	0	0	0	1	0	0	3	2	16	12.5	15	93.75
						B7 1	1	0	2	0	0	0	10	0	0	0	0	0	0	0	0	2	2	12	16.6667	12	100
						B7 1	1	0	0	0	0	0	4	1	0	0	0	0	0	1	0	3	0	6	0	5	83.3333
						B7 1	1	0	0	0	0	0	12	0	0	0	0	0	1	0	0	2	0	13	0	12	92.3077
						B7 1	1	0	0	0	0	0	16	0	0	0	0	0	0	0	0	1	0	16	0	16	100
						B7 1	1	0	0	0	0	0	4	0	0	3	0	0	0	0	0	2	0	7	0	4	57.1429
						B7 1	1	0	0	0	0	0	6	0	0	0	0	0	0	1	0	2	0	7	0	6	85.7143
						B7 1	1	0	0	0	0	0	7	2	0	0	0	0	0	0	0	2	0	9	0	9	100
						B7 1	1	0	0	0	0	0	6	0	0	0	0	0	0	2	0	2	0	8	0	6	75
						B7 1	1	0	0	0	0	0	3	0	0	0	0	0	1	2	0	3	0	6	0	3	50
						B7 1	1	0	1	0	0	0	12	0	0	1	0	0	1	0	0	4	1	15	6.66667	13	86.6667
						B7 1	1	0	1	0	0	0	4	0	0	0	0	0	0	1	0	3	1	6	16.6667	5	83.3333							175
						B7 1	1	0	0	0	0	0	12	1	0	2	0	0	0	0	0	3	0	15	0	13	86.6667	0	7	0	0	0	167	8	0	10	0	0	4	12	0		2.5
						B5 1	3	3	3	0	0	0	0	0	0	10	0	0	5	0	0	4	6	21	28.5714	6	28.5714																			1	2
						B5 1	3	5	0	0	0	0	0	0	0	15	0	0	1	0	0	3	5	21	23.8095	5	23.8095																			1	4
						B5 1	3	9	3	0	0	0	4	0	0	16	0	0	1	0	0	5	12	33	36.3636	16	48.4848																			1	7
						B5 1	3	3	2	0	0	0	0	0	0	8	0	0	0	0	2	4	5	15	33.3333	5	33.3333																				3
						B5 1	3	3	1	0	0	0	1	0	0	4	0	0	1	0	0	5	4	10	40	5	50																				3
						B5 1	3	0	0	0	0	0	17	0	1	2	0	0	3	0	0	4	0	23	0	18	78.2609
						B5 1	3	11	2	0	0	0	0	0	0	8	0	0	0	0	1	4	13	22	59.0909	13	59.0909																			3	8
						B5 1	3	2	0	0	0	0	0	0	0	3	0	0	1	0	0	3	2	6	33.3333	2	33.3333																				2
						B5 1	3	4	0	0	0	0	0	0	0	1	0	1	2	0	0	4	4	8	50	4	50																			1	3
						B5 1	3	1	0	0	0	0	0	0	0	4	0	0	0	0	1	3	1	6	16.6667	1	16.6667																			1
						B5 1	3	1	0	0	0	0	1	0	0	0	0	1	2	0	0	4	1	5	20	2	40																			1
						B5 1	3	1	0	0	0	0	0	0	0	1	0	0	2	0	0	3	1	4	25	1	25																			1
						B5 1	3	2	0	0	0	0	0	0	0	7	0	0	0	0	0	2	2	9	22.2222	2	22.2222																			2
						B5 1	3	1	0	0	0	0	0	0	0	2	0	0	2	0	0	3	1	5	20	1	20																			1
						B5 1	3	0	1	0	0	0	6	0	0	3	0	0	0	1	0	4	1	11	9.09091	7	63.6364
						B5 1	3	0	0	0	0	0	0	0	0	4	0	0	0	0	0	1	0	4	0	0	0
						B5 1	3	0	0	0	0	0	0	0	0	2	0	0	1	0	0	2	0	3	0	0	0
						B5 1	3	2	0	0	0	0	0	0	0	3	0	0	0	0	0	2	2	5	40	2	40																			1
						B5 1	3	0	1	0	0	0	8	0	0	7	0	0	0	0	0	3	1	16	6.25	9	56.25											108
						B5 1	3	0	0	0	0	0	0	0	0	6	0	0	3	0	0	2	0	9	0	0	0	3	10	0	0	0	37	0	1	106	0	2	24	1	4		3.25
						B3 2	1	1	3	0	0	0	0	0	0	4	0	0	0	0	0	3	4	8	50	4	50																			1
						B3 2	3	3	1	0	0	0	0	0	0	4	0	0	0	1	0	4	4	9	44.4444	4	44.4444																					3
						B3 2	1	3	3	0	0	0	1	0	0	3	0	0	0	0	0	4	6	10	60	7	70																			2		1
						B3 2	1	2	4	0	0	0	0	0	0	3	0	0	0	0	0	3	6	9	66.6667	6	66.6667																			1		1
						B3 2	1	0	7	0	0	0	0	0	0	3	0	0	0	0	0	2	7	10	70	7	70
						B3 2	1	0	9	0	0	0	0	0	0	2	0	0	0	0	2	3	9	13	69.2308	9	69.2308
						B3 2	1	1	4	0	0	0	0	0	0	0	0	0	0	0	0	2	5	5	100	5	100																					1
						B3 2	1	1	4	0	0	0	0	0	0	2	0	0	0	0	0	3	5	7	71.4286	5	71.4286																			1
						B3 2	3	8	3	0	0	0	0	0	0	3	0	0	0	0	0	3	11	14	78.5714	11	78.5714																			1	2	5
						B3 2	1	1	2	0	0	0	0	1	0	5	0	0	0	0	0	4	3	9	33.3333	4	44.4444																			1
						B3 2	1	1	6	0	0	0	0	0	0	5	0	0	0	0	0	3	7	12	58.3333	7	58.3333																					1
						B3 2	1	0	5	0	0	0	2	0	0	3	0	0	0	0	0	3	5	10	50	7	70
						B3 2	1	0	2	0	0	0	0	0	0	4	0	0	0	0	0	2	2	6	33.3333	2	33.3333
						B3 2	1	3	3	0	0	0	0	0	0	3	0	0	0	0	0	3	6	9	66.6667	6	66.6667																			3
						B3 2	1	2	4	0	0	0	0	0	0	2	0	0	0	0	0	3	6	8	75	6	75																			2
						B3 2	1	0	8	0	0	0	0	0	0	2	0	0	0	0	0	2	8	10	80	8	80
						B3 2	1	1	7	0	0	0	1	0	0	1	0	0	0	0	0	4	8	10	80	9	90																			1
						B3 2	1	0	4	0	0	0	0	0	0	4	0	0	0	0	0	2	4	8	50	4	50
						B3 2	3	0	1	0	0	0	0	0	0	2	0	0	0	0	0	2	1	3	33.3333	1	33.3333
						B3 2	1	0	8	0	0	0	0	0	0	0	0	0	0	0	0	1	8	8	100	8	100
						B3 5	1	0	3	0	0	0	0	0	0	2	0	0	0	1	0	3	3	6	50	3	50
						B3 5	1	0	2	0	0	0	0	0	0	2	0	0	0	0	0	2	2	4	50	2	50
						B3 5	1	0	2	0	0	0	0	0	0	2	0	0	0	0	0	2	2	4	50	2	50
						B3 5	1	0	3	0	0	0	2	0	0	0	0	0	1	0	0	3	3	6	50	5	83.3333
						B3 5	1	1	1	0	0	0	2	0	0	0	0	0	0	0	0	3	2	4	50	4	100																			1
						B3 5	1	2	3	0	0	0	1	0	0	1	0	0	0	1	0	5	5	8	62.5	6	75																			2
						B3 5	1	0	3	0	0	0	0	0	0	0	0	0	0	0	0	1	3	3	100	3	100
						B3 5	1	1	0	0	0	0	1	0	0	0	0	0	0	0	0	2	1	2	50	2	100																			1
						B3 5	1	0	6	0	0	0	1	0	0	0	0	0	0	0	0	2	6	7	85.7143	7	100
						B3 5	1	0	3	0	0	0	0	0	0	0	0	0	0	1	0	2	3	4	75	3	75
						B3 5	1	1	2	0	0	0	0	0	0	0	0	0	0	0	0	2	3	3	100	3	100																			1
						B3 5	1	1	0	0	0	0	0	0	0	1	0	0	0	0	0	2	1	2	50	1	50																			1
						B3 5	1	0	6	0	0	0	0	1	0	0	0	0	0	0	0	2	6	7	85.7143	7	100
						B3 5	1	0	3	0	0	0	0	0	0	1	0	0	0	0	1	3	3	5	60	3	60
						B3 5	1	0	3	0	0	0	1	0	0	1	0	0	0	0	0	3	3	5	60	4	80
						B3 5	1	0	2	0	0	0	0	0	0	1	0	0	0	0	0	2	2	3	66.6667	2	66.6667
						B3 5	1	1	2	0	0	0	0	0	0	1	0	0	0	0	0	3	3	4	75	3	75																			1
						B3 5	1	0	4	0	0	0	0	0	0	1	0	0	0	0	0	2	4	5	80	4	80
						B3 5	1	0	2	0	0	0	0	0	0	2	0	0	0	1	0	3	2	5	40	2	40
						B3 5	1	0	6	0	0	0	0	0	0	0	0	0	0	0	0	1	6	6	100	6	100
						B3 4	1	0	3	0	0	0	0	0	0	0	0	0	0	0	0	1	3	3	100	3	100
						B3 4	1	0	4	0	0	0	0	1	0	0	0	0	0	0	0	2	4	5	80	5	100
						B3 4	1	0	10	0	0	0	0	0	0	0	0	0	0	0	0	1	10	10	100	10	100
						B3 4	1	0	4	0	0	0	0	0	0	0	0	0	0	0	0	1	4	4	100	4	100
						B3 4	1	0	4	0	0	0	0	0	0	1	0	0	0	0	0	2	4	5	80	4	80
						B3 4	1	1	4	0	0	0	0	0	0	0	0	0	0	0	0	2	5	5	100	5	100																					1
						B3 4	1	0	4	0	0	0	0	0	0	0	0	0	0	0	1	2	4	5	80	4	80
						B3 4	1	0	3	0	0	0	0	0	0	0	0	0	0	0	0	1	3	3	100	3	100
						B3 4	1	1	5	0	0	0	0	0	0	2	0	0	0	0	0	3	6	8	75	6	75																					1
						B3 4	2	3	5	0	0	0	0	0	0	3	0	0	0	0	0	3	8	11	72.7273	8	72.7273																					3
						B3 4	1	0	3	0	0	0	0	0	0	0	0	0	0	0	0	1	3	3	100	3	100
						B3 4	1	0	3	0	0	0	0	0	0	1	0	0	0	0	0	2	3	4	75	3	75
						B3 4	1	0	3	0	0	0	0	0	0	4	0	0	0	0	0	2	3	7	42.8571	3	42.8571
						B3 4	2	1	4	0	0	0	0	0	0	3	0	0	0	0	0	3	5	8	62.5	5	62.5																					1
						B3 4	1	0	7	0	0	0	0	0	0	2	0	0	0	0	0	2	7	9	77.7778	7	77.7778
						B3 4	1	0	7	0	0	0	0	0	0	3	0	0	0	0	0	2	7	10	70	7	70
						B3 4	1	0	7	0	0	0	0	2	0	3	0	0	0	0	0	3	7	12	58.3333	9	75
						B3 4	1	0	5	0	0	0	0	0	0	2	0	0	0	0	0	2	5	7	71.4286	5	71.4286
						B3 4	1	0	0	0	0	0	0	0	0	2	0	0	0	1	0	2	0	3	0	0	0
						B3 4	1	0	3	0	0	0	0	0	0	3	0	0	0	0	0	2	3	6	50	3	50
						B3 1	1	0	9	0	0	0	0	0	0	1	0	0	0	0	0	2	9	10	90	9	90
						B3 1	3	6	7	0	0	0	0	0	0	2	0	0	0	0	2	4	13	17	76.4706	13	76.4706																			2	3
						B3 1	1	0	9	0	0	0	0	0	0	0	0	0	0	0	0	1	9	9	100	9	100
						B3 1	1	0	8	0	0	0	0	1	0	2	0	0	0	0	0	3	8	11	72.7273	9	81.8182
						B3 1	1	0	6	0	0	0	0	0	0	1	0	0	0	0	0	2	6	7	85.7143	6	85.7143
						B3 1	1	0	5	0	0	0	0	0	0	1	0	0	0	1	0	3	5	7	71.4286	5	71.4286
						B3 1	1	1	5	0	0	0	0	0	0	0	0	0	0	0	0	2	6	6	100	6	100																					1
						B3 1	1	0	2	0	0	0	0	0	0	0	0	0	2	0	0	2	2	4	50	2	50
						B3 1	1	1	2	0	0	0	0	0	0	1	0	0	0	0	0	3	3	4	75	3	75																			1
						B3 1	1	1	2	0	0	0	0	0	0	0	0	0	1	0	0	3	3	4	75	3	75																					1
						B3 1	3	5	3	0	0	0	0	0	0	1	0	0	0	0	0	3	8	9	88.8889	8	88.8889																				5
						B3 1	1	0	1	0	0	0	0	0	0	2	0	0	0	0	0	2	1	3	33.3333	1	33.3333
						B3 1	1	1	3	0	0	0	0	0	0	1	0	0	1	0	0	4	4	6	66.6667	4	66.6667																					1
						B3 1	2	0	1	0	0	0	0	0	0	1	0	0	0	0	0	2	1	2	50	1	50
						B3 1	1	1	5	0	0	0	0	0	0	3	0	0	0	0	0	3	6	9	66.6667	6	66.6667																					1
						B3 1	1	0	6	0	0	0	0	1	0	1	0	0	0	0	0	3	6	8	75	7	87.5
						B3 1	1	1	3	0	0	0	1	0	0	4	0	0	0	0	0	4	4	9	44.4444	5	55.5556																					1
						B3 1	1	0	3	0	0	0	0	0	0	5	0	0	0	0	0	2	3	8	37.5	3	37.5																		0.1125
						B3 1	1	0	3	0	0	0	0	0	0	4	0	0	0	0	0	2	3	7	42.8571	3	42.8571																0.881917		0.75
						B3 1	1	1	3	0	0	0	0	1	0	5	0	0	0	0	0	4	4	10	40	5	50	58	318	0	0	0	13	8	0	134	0	0	5	7	6		2.4625		0.1375			1
						B1 1	3	7	6	0	0	0	0	1	0	0	0	0	0	1	0	4	13	15	86.6667	14	93.3333																				4	3
						B1 1	3	1	5	0	0	0	0	1	0	1	0	0	0	0	1	5	6	9	66.6667	7	77.7778																					1
						B1 1	3	8	9	0	0	0	0	1	0	0	0	0	1	3	0	5	17	22	77.2727	18	81.8182																					6
						B1 1	3	1	3	0	0	0	0	0	0	0	0	0	0	1	0	3	4	5	80	4	80				42																	1
						B1 1	3	0	2	0	0	0	0	0	0	0	0	0	0	1	0	2	2	3	66.6667	2	66.6667	17	25	0	0	0	0	3	0	1	0	0	1	6	1		3.8
						B1 1
						B1 1
						B1 1
						B1 1
						B1 1
						B1 1
						B1 1
						B1 1
						B1 1
						B1 1
						B1 1
						B1 1
						B1 1
						B1 1
						B1 1
[truncated: 40 more columns]

## Sheet: Figure 6
						Site	density (ind.m2)	Carbon storage (g)	C (g.Ind-1)	Latitude (degrees)
Column H	Data from Tab 'Raw data' column P					B3 2	57.6	10.668	0.185208	72.6322
Column J	Data from Tab 'Carbon content' column CH					B3 2	64.8	7.973	0.12304	72.6338
						B3 2	72	9.744	0.135333	72.6338
	Fig 6 Upper is Column K vs Column I					B3 2	64.8	10.857	0.167546	72.6338
	Fig 6 Lower is Column K vs Column J					B3 2	72	15.26	0.211944	72.6338
						B3 2	93.6	17.227	0.184049	72.6338
						B3 2	36	6.307	0.175194	72.6338
						B3 2	50.4	9.261	0.18375	72.6337
						B3 2	100.8	10.024	0.0994444	72.6337
						B3 2	64.8	11.76	0.181481	72.6336
						B3 2	86.4	16.786	0.194282	72.6336
						B3 2	72	12.796	0.177722	72.6335
						B3 2	43.2	9.002	0.20838	72.6335
						B3 2	64.8	9.429	0.145509	72.6334
						B3 2	57.6	9.38	0.162847	72.6334
						B3 2	72	15.33	0.212917	72.6333
						B3 2	72	12.74	0.176944	72.6333
						B3 2	57.6	12.096	0.21	72.6332
						B3 2	21.6	4.501	0.20838	72.6332
						B3 2	57.6	12.376	0.214861	72.6325
						B3 5	43.2	7.756	0.179537	72.6325
						B3 5	28.8	6.048	0.21	72.6324
						B3 5	28.8	6.048	0.21	72.6323
						B3 5	43.2	5.866	0.135787	72.6323
						B3 5	28.8	2.296	0.0797222	72.6323
						B3 5	57.6	6.832	0.118611	72.6322
						B3 5	21.6	4.641	0.214861	72.6322
						B3 5	14.4	0.434	0.0301389	72.6321
						B3 5	50.4	9.597	0.190417	72.6322
						B3 5	28.8	4.802	0.166736	72.6322
						B3 5	21.6	3.213	0.14875	72.6321
						B3 5	14.4	1.596	0.110833	72.6321
						B3 5	50.4	10.444	0.207222	72.6322
						B3 5	36	6.293	0.174806	72.6322
						B3 5	36	6.433	0.178694	72.6322
						B3 5	21.6	4.571	0.21162	72.6322
						B3 5	28.8	4.69	0.162847	72.6322
						B3 5	36	7.665	0.212917	72.6322
						B3 5	36	6.209	0.172472	72.6322
						B3 5	43.2	9.282	0.214861	72.6321
						B3 4	21.6	4.641	0.214861	72.6321
						B3 4	36	7.35	0.204167	72.6321
						B3 4	72	15.47	0.214861	72.6321
						B3 4	28.8	6.188	0.214861	72.6321
						B3 4	36	7.665	0.212917	72.6322
						B3 4	36	6.307	0.175194	72.6322
						B3 4	36	6.363	0.17675	72.6323
						B3 4	21.6	4.641	0.214861	72.6322
						B3 4	57.6	10.808	0.187639	72.6324
						B3 4	79.2	12.523	0.158119	72.6325
						B3 4	21.6	4.641	0.214861	72.6325
						B3 4	28.8	6.118	0.212431	72.6326
						B3 4	50.4	10.549	0.209306	72.6326
						B3 4	57.6	10.738	0.186424	72.6327
						B3 4	64.8	13.783	0.212701	72.6328
						B3 4	72	15.26	0.211944	72.6328
						B3 4	86.4	17.584	0.203519	72.6329
						B3 4	50.4	10.689	0.212083	72.6329
						B3 4	21.6	3.115	0.144213	72.633
						B3 4	43.2	9.072	0.21	72.6331
						B3 1	72	15.4	0.213889	72.6338
						B3 1	122.4	14.847	0.121299	72.6338
						B3 1	64.8	13.923	0.214861	72.6339
						B3 1	79.2	16.492	0.208232	72.6339
						B3 1	50.4	10.759	0.213472	72.634
						B3 1	50.4	9.373	0.185972	72.634
						B3 1	43.2	7.854	0.181806	72.634
						B3 1	28.8	4.284	0.14875	72.634
						B3 1	28.8	4.69	0.162847	72.634
						B3 1	28.8	3.808	0.132222	72.634
						B3 1	64.8	6.713	0.103596	72.634
						B3 1	21.6	4.501	0.20838	72.634
						B3 1	43.2	6.832	0.158148	72.634
						B3 1	14.4	3.024	0.21	72.634
						B3 1	64.8	12.285	0.189583	72.634
						B3 1	57.6	11.921	0.206962	72.634
						B3 1	64.8	10.983	0.169491	72.634
						B3 1	57.6	12.026	0.208785	72.634
						B3 1	50.4	10.549	0.209306	72.634
						B3 1	72	13.307	0.184819	72.634
						B13 1	36	7.819	0.217194	74.5009
						B13 1	14.4	1.19	0.0826389	74.5009
						B13 1	14.4	3.654	0.25375	74.5009
						B13 1	21.6	1.575	0.0729167	74.5009
						B13 1	14.4	1.19	0.0826389	74.5009
						B13 1	28.8	2.814	0.0977083	74.5008
						B13 1	14.4	1.904	0.132222	74.5004
						B13 1	21.6	1.575	0.0729167	74.5008
						B13 1	7.2	0.595	0.0826389	74.5008
						B13 1	14.4	5.397	0.374792	74.5008
						B13 1	36	7.581	0.210583	74.5007
						B13 1	14.4	5.292	0.3675	74.5007
						B13 1	28.8	2.275	0.0789931	74.5007
						B13 1	14.4	1.19	0.0826389	74.5007
						B13 1	21.6	1.575	0.0729167	74.5006
						B13 1	28.8	3.073	0.106701	74.5006
						B13 1	28.8	2.534	0.0879861	74.5006
						B13 1	28.8	5.453	0.18934	74.5006
						B13 1	28.8	3.591	0.124688	74.5006
						B13 1	7.2	0.595	0.0826389	74.5005
						B13 2	64.8	3.045	0.0469907	74.5004
						B13 2	36	2.632	0.0731111	74.5004
						B13 2	14.4	0.805	0.0559028	74.5005
						B13 2	21.6	1.295	0.0599537	74.5005
						B13 2	14.4	5.705	0.396181	74.5005
						B13 2	21.6	1.4	0.0648148	74.5005
						B13 2	43.2	4.998	0.115694	74.5006
						B13 2	21.6	1.225	0.056713	74.5006
						B13 2	36	13.055	0.362639	74.5006
						B13 2	21.6	2.527	0.116991	74.5006
						B13 2	21.6	1.575	0.0729167	74.5007
						B13 2	28.8	4.046	0.140486	74.5007
						B13 2	36	5.117	0.142139	74.5007
						B13 2	28.8	2.884	0.100139	74.5008
						B13 2	36	10.003	0.277861	74.5008
						B13 2	28.8	6.741	0.234063	74.5008
						B13 2	36	8.4	0.233333	74.5009
						B13 2	43.2	7.189	0.166412	74.5009
						B13 2	21.6	3.213	0.14875	74.5009
						B13 2	93.6	15.722	0.16797	74.501
						B13 4	14.4	0.805	0.0559028	74.499
						B13 4	14.4	5.705	0.396181	74.499
						B13 4	14.4	5.705	0.396181	74.4991
						B13 4	28.8	5.096	0.176944	74.4991
						B13 4	14.4	1.085	0.0753472	74.4991
						B13 4	50.4	5.404	0.107222	74.4992
						B13 4	57.6	4.613	0.0800868	74.499
						B13 4	21.6	0.875	0.0405093	74.4993
						B13 4	28.8	6.629	0.230174	74.4991
						B13 4	14.4	5.705	0.396181	74.4993
						B13 4	14.4	0.735	0.0510417	74.4994
						B13 4	21.6	2.499	0.115694	74.4994
						B13 4	36	5.544	0.154	74.4994
						B13 4	36	2.275	0.0631944	74.4994
						B13 4	28.8	2.065	0.0717014	74.4995
						B13 4	7.2	0.595	0.0826389	74.4995
						B13 4	21.6	2.632	0.121852	74.4996
						B13 4	14.4	1.085	0.0753472	74.4996
						B13 5	36	4.907	0.136306	74.5002
						B13 5	21.6	6.839	0.31662	74.5002
						B13 5	50.4	11.158	0.221389	74.5002
						B13 5	7.2	0.49	0.0680556	74.4994
						B13 5	28.8	4.074	0.141458	74.4995
						B13 5	21.6	2.499	0.115694	74.5001
						B13 5	28.8	6.097	0.211701	74.5
						B13 5	21.6	2.394	0.110833	74.5
						B13 5	36	3.528	0.098	74.5
						B13 5	43.2	6.321	0.146319	74.4998
						B13 5	57.6	16.821	0.292031	74.4998
						B13 5	43.2	3.794	0.0878241	74.4997
						B13 5	21.6	2.632	0.121852	74.4997
						B13 5	21.6	1.68	0.0777778	74.4996
						B13 5	14.4	1.834	0.127361	74.4996
						B13 5	43.2	3.444	0.0797222	74.4995
						B13 5	21.6	3.381	0.156528	74.4995
						B13 5	21.6	2.044	0.0946296	74.4995
						B13 5	28.8	6.895	0.23941	74.4994
						B13 5	36	7.175	0.199306	74.4994
						B14 4	21.6	0.252	0.0116667	76.4989
						B14 4	21.6	0.567	0.02625	76.4989
						B14 4	43.2	1.071	0.0247917	76.499
						B14 4	43.2	1.659	0.0384028	76.499
						B14 4	43.2	7.357	0.170301	76.499
						B14 4	43.2	2.772	0.0641667	76.4991
						B14 4	36	9.163	0.254528	76.4991
						B14 4	86.4	2.485	0.0287616	76.4992
						B14 4	21.6	0.483	0.0223611	76.4992
						B14 4	28.8	2.191	0.0760764	76.4992
						B14 4	21.6	2.135	0.0988426	76.4993
						B14 4	28.8	13.636	0.473472	76.4994
						B14 4	43.2	1.218	0.0281944	76.4994
						B14 4	28.8	6.93	0.240625	76.4995
						B14 4	43.2	2.303	0.0533102	76.4995
						B14 4	28.8	9.044	0.314028	76.4995
						B14 4	43.2	8.925	0.206597	76.4996
						B14 4	50.4	3.136	0.0622222	76.4996
						B14 4	21.6	2.618	0.121204	76.4997
						B14 4	28.8	1.316	0.0456944	76.4998
						B14 1	28.8	2.723	0.0945486	76.5008
						B14 1	57.6	3.129	0.0543229	76.5008
						B14 1	28.8	2.303	0.0799653	76.5007
						B14 1	36	1.393	0.0386944	76.5008
						B14 1	28.8	3.675	0.127604	76.5008
						B14 1	21.6	1.869	0.0865278	76.5007
						B14 1	14.4	0.196	0.0136111	76.4992
						B14 1	28.8	0.854	0.0296528	76.5008
						B14 1	21.6	0.567	0.02625	76.5008
						B14 1	36	1.603	0.0445278	76.5008
						B14 1	28.8	8.813	0.306007	76.5007
						B14 1	50.4	2.142	0.0425	76.5007
						B14 1	28.8	1.316	0.0456944	76.5007
						B14 1	43.2	1.449	0.0335417	76.5007
						B14 1	28.8	9.044	0.314028	76.5007
						B14 1	14.4	0.742	0.0515278	76.5007
						B14 1	43.2	2.289	0.0529861	76.5007
						B14 1	14.4	0.994	0.0690278	76.5007
						B14 1	7.2	0.371	0.0515278	76.5006
						B14 2	21.6	1.05	0.0486111	76.5007
						B14 2	43.2	1.533	0.0354861	76.5007
						B14 2	14.4	1.225	0.0850694	76.5007
						B14 2	43.2	0.903	0.0209028	76.5007
						B14 2	50.4	1.337	0.0265278	76.5006
						B14 2	21.6	1.974	0.0913889	76.5005
						B14 2	14.4	0.511	0.0354861	76.5005
						B14 2	28.8	0.854	0.0296528	76.5005
						B14 2	36	2.877	0.0799167	76.5004
						B14 2	43.2	9.219	0.213403	76.5004
						B14 2	21.6	0.651	0.0301389	76.5003
						B14 2	50.4	7.665	0.152083	76.5002
						B14 2	43.2	1.218	0.0281944	76.5002
						B14 2	50.4	1.589	0.0315278	76.5002
						B14 2	50.4	2.59	0.0513889	76.5001
						B14 2	36	0.994	0.0276111	76.5001
						B14 2	57.6	10.276	0.178403	76.5
						B14 2	14.4	0.511	0.0354861	76.4999
						B14 2	21.6	0.882	0.0408333	76.4999
						B14 2	28.8	1.022	0.0354861	76.4999
						B15 1	21.6	0.56	0.0259259	78.2508
						B15 1	64.8	5.894	0.0909568	78.2509
						B15 1	57.6	2.478	0.0430208	78.2509
						B15 1	43.2	2.03	0.0469907	78.2511
						B15 1	64.8	2.135	0.0329475	78.2511
						B15 1	28.8	1.533	0.0532292	78.2512
						B15 1	36	1.225	0.0340278	78.2512
						B15 1	21.6	1.862	0.0862037	78.2513
						B15 1	21.6	1.288	0.0596296	78.2513
						B15 1	36	2.037	0.0565833	78.2514
						B15 1	28.8	1.505	0.0522569	78.2514
						B15 1	36	1.701	0.04725	78.2515
						B15 1	36	1.778	0.0493889	78.2515
						B15 1	14.4	0.987	0.0685417	78.2515
						B15 1	28.8	1.022	0.0354861	78.2516
						B15 1	28.8	1.071	0.0371875	78.2516
						B15 1	14.4	1.078	0.0748611	78.2517
						B15 1	28.8	2.023	0.0702431	78.2517
						B15 1	43.2	4.683	0.108403	78.2518
						B15 1	28.8	1.484	0.0515278	78.2518
						B15 10	43.2	2.765	0.0640046	78.2517
						B15 10	28.8	1.995	0.0692708	78.2517
						B15 10	72	3.29	0.0456944	78.2517
						B15 10	28.8	1.358	0.0471528	78.2517
						B15 10	28.8	1.001	0.0347569	78.2518
						B15 10	28.8	7.959	0.276354	78.22
						B15 10	21.6	0.791	0.0366204	78.2525
						B15 10	36	1.764	0.049	78.2526
						B15 10	36	2.303	0.0639722	78.2526
						B15 10	21.6	1.33	0.0615741	78.2526
						B15 10	21.6	1.19	0.0550926	78.2526
						B15 10	21.6	0.791	0.0366204	78.2526
						B15 10	36	2.359	0.0655278	78.2526
						B15 10	21.6	1.393	0.0644907	78.2526
						B15 10	57.6	2.954	0.0512847	78.2526
						B15 10	43.2	2.1	0.0486111	78.2526
						B15 10	28.8	1.995	0.0692708	78.2526
						B15 10	57.6	3.059	0.0531076	78.2526
						B15 10	79.2	3.759	0.0474621	78.2526
						B15 11	36	1.162	0.0322778	78.2526
						B15 12	36	2.366	0.0657222	78.2508
						B15 12	21.6	1.281	0.0593056	78.2508
						B15 12	21.6	1.19	0.0550926	78.2508
						B15 12	57.6	4.081	0.0708507	78.2508
						B15 12	50.4	8.659	0.171806	78.2508
						B15 12	50.4	10.108	0.200556	78.2508
						B15 12	28.8	0.959	0.0332986	78.2508
						B15 12	36	1.113	0.0309167	78.2508
						B15 12	14.4	1.568	0.108889	78.2508
						B15 12	28.8	1.505	0.0522569	78.2508
						B15 12	14.4	1.155	0.0802083	78.2508
						B15 12	57.6	2.947	0.0511632	78.2508
						B15 12	21.6	1.372	0.0635185	78.2508
						B15 12	28.8	2.177	0.0755903	78.2508
						B15 12	57.6	3.22	0.0559028	78.2508
						B15 12	43.2	2.653	0.061412	78.2508
						B15 12	28.8	1.596	0.0554167	78.2508
						B15 12	50.4	2.814	0.0558333	78.2508
						B15 12	43.2	1.918	0.0443981	78.2508
						B15 12	36	1.197	0.03325	78.2508
						B15 11	36	2.548	0.0707778	78.2515
						B15 11	28.8	1.484	0.0515278	78.2517
						B15 11	36	1.869	0.0519167	78.2517
						B15 11	36	1.708	0.0474444	78.2518
						B15 11	43.2	3.255	0.0753472	78.2518
						B15 11	28.8	1.085	0.0376736	78.2519
						B15 11	43.2	2.163	0.0500694	78.2519
						B15 11	14.4	0.343	0.0238194	78.252
						B15 11	21.6	1.218	0.0563889	78.252
						B15 11	43.2	2.093	0.0484491	78.2521
						B15 11	50.4	8.757	0.17375	78.2521
						B15 11	28.8	7.637	0.265174	78.2522
						B15 11	28.8	1.393	0.0483681	78.2523
						B15 11	28.8	1.596	0.0554167	78.2523
						B15 11	21.6	1.372	0.0635185	78.2523
						B15 11	28.8	9.506	0.330069	78.2524
						B15 11	21.6	1.218	0.0563889	78.2524
						B15 11	21.6	7.182	0.3325	78.2524
						B15 11	43.2	1.967	0.0455324	78.2525
						B15 11	43.2	8.043	0.186181	78.2525
						B16 1	309.6	72.254	0.233379	80.1155
						B16 1	273.6	22.414	0.0819225	80.1157
						B16 1	237.6	34.391	0.144743	80.1157
						B16 1	230.4	21.217	0.0920877	80.1158
						B16 1	230.4	18.298	0.0794184	80.1158
						B16 1	151.2	28.189	0.186435	80.1159
						B16 1	295.2	59.325	0.200965	80.1159
						B16 1	223.2	18.34	0.0821685	80.116
						B16 1	201.6	24.178	0.119931	80.1161
						B16 1	252	20.342	0.0807222	80.1162
						B16 1	187.2	32.879	0.175636	80.1164
						B16 1	172.8	30.394	0.175891	80.1165
						B16 1	223.2	32.76	0.146774	80.1165
						B16 1	144	40.145	0.278785	80.1166
						B16 1	194.4	18.165	0.0934414	80.1166
						B16 1	194.4	18.55	0.0954218	80.1167
						B16 1	194.4	20.671	0.106332	80.1167
						B16 1	100.8	5.383	0.0534028	80.1168
						B16 1	216	33.53	0.155231	80.1169
						B16 1	165.6	13.622	0.0822585	80.117
						B16 2	100.8	21.147	0.209792	80.114
						B16 2	50.4	4.151	0.0823611	80.1141
						B16 2	57.6	5.481	0.0951562	80.1141
						B16 2	28.8	2.009	0.0697569	80.1141
						B16 2	86.4	11.382	0.131736	80.1142
						B16 2	43.2	4.123	0.0954398	80.1142
						B16 2	108	53.921	0.499269	80.1143
						B16 2	86.4	20.419	0.236331	80.1143
						B16 2	79.2	6.244	0.0788384	80.1143
						B16 2	72	22.554	0.31325	80.1143
						B16 2	43.2	2.52	0.0583333	80.1144
						B16 2	57.6	21.742	0.377465	80.1144
						B16 2	72	6.979	0.0969306	80.1144
						B16 2	86.4	11.06	0.128009	80.1145
						B16 2	57.6	20.069	0.34842	80.1145
						B16 2	43.2	18.641	0.431505	80.1145
						B16 2	50.4	19.278	0.3825	80.1145
						B16 2	64.8	50.673	0.781991	80.1145
						B16 2	50.4	4.137	0.0820833	80.1145
						B16 2	79.2	7.077	0.0893561	80.1146
						B16 5	64.8	4.431	0.0683796	80.0938
						B16 5	43.2	18.641	0.431505	80.0938
						B16 5	129.6	28.035	0.216319	80.0938
						B16 5	64.8	4.284	0.0661111	80.0939
						B16 5	93.6	6.748	0.072094	80.0939
						B16 5	79.2	6.608	0.0834343	80.0939
						B16 5	64.8	4.424	0.0682716	80.0939
						B16 5	93.6	6.216	0.0664103	80.0939
						B16 5	86.4	7.301	0.0845023	80.0939
						B17 1	79.2	7.889	0.0996086	81.3225
						B17 1	108	15.043	0.139287	81.3293
						B17 2	79.2	7.735	0.0976641	81.3301
						B17 2	100.8	7.693	0.0763194	81.3171
						B17 2	237.6	37.009	0.155762	81.317
						B17 2	36	2.723	0.0756389	81.317
						B17 2	57.6	6.181	0.107309	81.3169
						B17 2	93.6	19.313	0.206335	81.3168
						B17 2	36	0.546	0.0151667	81.3167
						B17 2	50.4	2.212	0.0438889	81.3166
						B17 2	93.6	14.833	0.158472	81.3166
						B17 2	36	4.333	0.120361	81.3166
						B17 2	57.6	4.837	0.0839757	81.3166
						B17 3	115.2	14.371	0.124748	81.3102
						B17 3	57.6	2.128	0.0369444	81.3101
						B17 3	72	8.953	0.124347	81.3101
						B17 3	64.8	7.105	0.109645	81.31
						B17 3	86.4	5.453	0.0631134	81.3099
						B17 3	194.4	36.134	0.185874	81.3098
						B17 3	64.8	10.227	0.157824	81.3098
						B17 3	64.8	5.999	0.0925772	81.3097
						B17 3	28.8	1.267	0.0439931	81.3097
						B17 3	180	18.928	0.105156	81.3096
						B17 3	122.4	11.592	0.0947059	81.3095
						B17 3	57.6	5.285	0.0917535	81.3094
						B17 3	50.4	4.459	0.0884722	81.3094
						B17 3	21.6	4.053	0.187639	81.3093
						B17 3	28.8	6.132	0.212917	81.3092
						B17 3	230.4	16.821	0.0730078	81.3091
						B17 3	57.6	1.008	0.0175	81.3091
						B17 3	72	6.832	0.0948889	81.309
						B17 3	79.2	7.112	0.089798	81.3089
						B17 3	129.6	10.528	0.0812346	81.3088
						B17 4	93.6	8.015	0.0856303	81.3022
						B17 4	57.6	8.162	0.141701	81.3021
						B17 4	180	14.28	0.0793333	81.302
						B17 4	72	6.167	0.0856528	81.302
						B17 4	108	3.003	0.0278056	81.3019
						B17 4	100.8	22.946	0.227639	81.3018
						B17 4	43.2	3.542	0.0819907	81.3018
						B17 4	57.6	4.655	0.080816	81.3017
						B17 4	72	3.255	0.0452083	81.3016
						B17 4	28.8	2.044	0.0709722	81.3016
						B17 4	43.2	3.059	0.0708102	81.3016
						B17 4	57.6	12.25	0.212674	81.3015
						B17 4	28.8	2.611	0.0906597	81.3015
						B17 4	64.8	6.202	0.0957099	81.3014
						B17 4	64.8	7.091	0.109429	81.3014
						B17 4	43.2	1.596	0.0369444	81.3013
						B17 4	43.2	12.152	0.281296	81.3012
						B17 4	64.8	7.483	0.115478	81.3012
						B17 4	64.8	11.571	0.178565	81.3011
						B17 4	43.2	5.677	0.131412	81.3011
						B17 5	151.2	22.155	0.146528	81.301
						B17 5	136.8	18.214	0.133143	81.3009
						B17 5	115.2	4.697	0.0407726	81.3008
						B17 5	151.2	11.872	0.0785185	81.3008
						B17 5	72	2.674	0.0371389	81.3007
						B17 5	79.2	5.656	0.0714141	81.3006
						B17 5	79.2	10.381	0.131073	81.3005
						B17 5	79.2	2.093	0.0264268	81.3005
						B17 5	136.8	7.336	0.0536257	81.3004
						B17 5	86.4	7.294	0.0844213	81.3003
						B17 5	122.4	6.041	0.0493546	81.3003
						B17 5	86.4	13.699	0.158553	81.3002
						B17 5	86.4	10.549	0.122095	81.3001
						B17 5	86.4	8.61	0.0996528	81.3001
						B17 5	108	16.345	0.151343	81.3
						B17 5	108	9.156	0.0847778	81.2999
						B17 5	172.8	24.122	0.139595	81.2998
						B17 5	144	17.78	0.123472	81.2998
						B17 5	93.6	8.568	0.0915385	81.2997
						B17 5	79.2	2.926	0.0369444	81.2996

## Sheet: Figure 7
			Tide type	flow raw data (m.s-1)	carbon data (g C.m-2)	flow raw data (m.s-1)	carbon data (g C.m-2)	flow raw data (m.s-1)	carbon data (g C.m-2)	flow raw data (m.s-1)	carbon data (g C.m-2)	flow raw data (m.s-1)	carbon data (g C.m-2)	Mean flow raw data (m.s-1)	Mean carbon data (g C.m-2)	SD carbon (g C.m-2)		flow raw data (m.s-1)	carbon data (g C.m-2)	flow raw data (m.s-1)	carbon data (g C.m-2)	flow raw data (m.s-1)	carbon data (g C.m-2)	flow raw data (m.s-1)	carbon data (g C.m-2)	flow raw data (m.s-1)	carbon data (g C.m-2)	Mean flow raw data (m.s-1)	Mean carbon data (g C.m-2)	SD carbon (g C.m-2)		flow raw data (m.s-1)	carbon data (g C.m-2)	SD carbon (g C.m-2)
			SPRING	0.08	0.56	0.11	0.252	0.14	1.4812	0.21	10.668	0.25	72.254	0.08	2.5501	2.20601	NEAP	0.01	0.56	0.05	0.252	0.06	1.4812	0.07	7.889	0.1	72.254	0.01	2.93359	2.25443		0.08	0.56	-0.251812
Flow data from 'Raw data' tab				0.08	5.894	0.11	0.567	0.14	4.2364	0.21	7.973	0.25	22.414	0.11	2.97572	3.17885		0.01	5.894	0.05	0.567	0.06	4.2364	0.07	15.043	0.1	22.414	0.05	3.27016	3.18733		0.08	5.894	0.77041
Carbon data from 'Carbon content' Tab				0.08	2.478	0.11	1.071	0.14	2.0118	0.21	9.744	0.25	34.391	0.14	4.35861	3.28065		0.01	2.478	0.05	1.071	0.06	2.0118	0.07	7.735	0.1	34.391	0.06	4.35861	3.28065		0.08	2.478	0.394101
SPRING TIDE				0.08	2.03	0.11	1.659	0.14	1.6268	0.21	10.857	0.25	21.217	0.21	9.03069	5.79905		0.01	2.03	0.05	1.659	0.06	1.6268	0.07	7.693	0.1	21.217	0.07	9.94961	7.33047		0.08	2.03	0.307496
columns E,G,I,K & M are flow raw data (m.s-1)				0.08	2.135	0.11	7.357	0.14	3.1052	0.21	15.26	0.25	18.298	0.25	20.7768	17.252		0.01	2.135	0.05	7.357	0.06	3.1052	0.07	37.009	0.1	18.298	0.1	14.7389	15.6756		0.08	2.135	0.329398
columns F,H,J,L,N are raw carbon data (g C.m-2)				0.08	1.533	0.11	2.772	0.14	2.3408	0.21	17.227	0.25	28.189					0.01	1.533	0.05	2.772	0.06	2.3408	0.07	2.723	0.1	28.189					0.08	1.533	0.185542
				0.08	1.225	0.11	9.163	0.14	2.0118	0.21	6.307	0.25	59.325					0.01	1.225	0.05	9.163	0.06	2.0118	0.07	6.181	0.1	59.325					0.08	1.225	0.0881361
columns O-P are data means				0.08	1.862	0.11	2.485	0.14	1.0318	0.21	9.261	0.25	18.34					0.01	1.862	0.05	2.485	0.06	1.0318	0.07	19.313	0.1	18.34					0.08	1.862	0.26998
colum Q is (Carbon) standard deviation				0.08	1.288	0.11	0.483	0.14	5.5426	0.21	10.024	0.25	24.178					0.01	1.288	0.05	0.483	0.06	5.5426	0.07	0.546	0.1	24.178					0.08	1.288	0.109916
				0.08	2.037	0.11	2.191	0.14	7.7266	0.21	11.76	0.25	20.342					0.01	2.037	0.05	2.191	0.06	7.7266	0.07	2.212	0.1	20.342					0.08	2.037	0.308991
NEAP TIDE				0.08	1.505	0.11	2.135	0.14	5.5832	0.21	16.786	0.25	32.879					0.01	1.505	0.05	2.135	0.06	5.5832	0.07	14.833	0.1	32.879					0.08	1.505	0.177536
columns S,U,W,Y & AA are flow raw data (m.s-1)				0.08	1.701	0.11	13.636	0.14	3.1486	0.21	12.796	0.25	30.394					0.01	1.701	0.05	13.636	0.06	3.1486	0.07	4.333	0.1	30.394					0.08	1.701	0.230704
columns T,V,X,Z,AB are raw carbon data (g C.m-2)				0.08	1.778	0.11	1.218	0.14	1.3356	0.21	9.002	0.25	32.76					0.01	1.778	0.05	1.218	0.06	1.3356	0.07	4.837	0.1	32.76					0.08	1.778	0.249932
				0.08	0.987	0.11	6.93	0.14	2.0118	0.21	9.429	0.25	40.145					0.01	0.987	0.05	6.93	0.06	2.0118	0.07	14.371	0.1	40.145					0.08	0.987	-0.00568285
columns AC-AD are data means				0.08	1.022	0.11	2.303	0.14	3.7646	0.21	9.38	0.25	18.165					0.01	1.022	0.05	2.303	0.06	3.7646	0.07	2.128	0.1	18.165					0.08	1.022	0.0094509
colum AE is (Carbon) standard deviation				0.08	1.071	0.11	9.044	0.14	2.6796	0.21	15.33	0.25	18.55					0.01	1.071	0.05	9.044	0.06	2.6796	0.07	8.953	0.1	18.55					0.08	1.071	0.0297895
				0.08	1.078	0.11	8.925	0.14	5.7442	0.21	12.74	0.25	20.671					0.01	1.078	0.05	8.925	0.06	5.7442	0.07	7.105	0.1	20.671					0.08	1.078	0.0326188
				0.08	2.023	0.11	3.136	0.14	4.0824	0.21	12.096	0.25	5.383					0.01	2.023	0.05	3.136	0.06	4.0824	0.07	5.453	0.1	5.383					0.08	2.023	0.305996
				0.08	4.683	0.11	2.618	0.14	0.595	0.21	4.501	0.25	33.53					0.01	4.683	0.05	2.618	0.06	0.595	0.07	36.134	0.1	33.53					0.08	4.683	0.670524
				0.08	1.484	0.11	1.316	0.14	3.5364	0.21	12.376	0.25	13.622					0.01	1.484	0.05	1.316	0.06	3.5364	0.07	10.227	0.1	13.622					0.08	1.484	0.171434
				0.08	2.765	0.11	2.723	0.14	3.2144	0.21	7.756	0.25	21.147					0.01	2.765	0.05	2.723	0.06	3.2144	0.07	5.999	0.1	21.147					0.08	2.765	0.441695
Fig 7				0.08	1.995	0.11	3.129	0.14	0.805	0.21	6.048	0.25	4.151					0.01	1.995	0.05	3.129	0.06	0.805	0.07	1.267	0.1	4.151					0.08	1.995	0.299943
Column AG = stacked flow rates				0.08	3.29	0.11	2.303	0.14	1.4406	0.21	6.048	0.25	5.481					0.01	3.29	0.05	2.303	0.06	1.4406	0.07	18.928	0.1	5.481					0.08	3.29	0.517196
Column AH=stacked mean carbon values				0.08	1.358	0.11	1.393	0.14	5.705	0.21	5.866	0.25	2.009					0.01	1.358	0.05	1.393	0.06	5.705	0.07	11.592	0.1	2.009					0.08	1.358	0.1329
				0.08	1.001	0.11	3.675	0.14	1.6912	0.21	2.296	0.25	11.382					0.01	1.001	0.05	3.675	0.06	1.6912	0.07	5.285	0.1	11.382					0.08	1.001	0.000434077
				0.08	7.959	0.11	1.869	0.14	5.4621	0.21	6.832	0.25	4.123					0.01	7.959	0.05	1.869	0.06	5.4621	0.07	4.459	0.1	4.123					0.08	7.959	0.900859
				0.08	0.791	0.11	0.196	0.14	1.5708	0.21	4.641	0.25	53.921					0.01	0.791	0.05	0.196	0.06	1.5708	0.07	4.053	0.1	53.921					0.08	0.791	-0.101824
				0.08	1.764	0.11	0.854	0.14	13.4008	0.21	0.434	0.25	20.419					0.01	1.764	0.05	0.854	0.06	13.4008	0.07	6.132	0.1	20.419					0.08	1.764	0.246499
				0.08	2.303	0.11	0.567	0.14	2.6726	0.21	9.597	0.25	6.244					0.01	2.303	0.05	0.567	0.06	2.6726	0.07	16.821	0.1	6.244					0.08	2.303	0.362294
				0.08	1.33	0.11	1.603	0.14	1.8662	0.21	4.802	0.25	22.554					0.01	1.33	0.05	1.603	0.06	1.8662	0.07	1.008	0.1	22.554					0.08	1.33	0.123852
				0.08	1.19	0.11	8.813	0.14	4.3372	0.21	3.213	0.25	2.52					0.01	1.19	0.05	8.813	0.06	4.3372	0.07	6.832	0.1	2.52					0.08	1.19	0.075547
				0.08	0.791	0.11	2.142	0.14	5.117	0.21	1.596	0.25	21.742					0.01	0.791	0.05	2.142	0.06	5.117	0.07	7.112	0.1	21.742					0.08	0.791	-0.101824
				0.08	2.359	0.11	1.316	0.14	3.0296	0.21	10.444	0.25	6.979					0.01	2.359	0.05	1.316	0.06	3.0296	0.07	10.528	0.1	6.979					0.08	2.359	0.372728
				0.08	1.393	0.11	1.449	0.14	10.1486	0.21	6.293	0.25	11.06					0.01	1.393	0.05	1.449	0.06	10.1486	0.07	8.015	0.1	11.06					0.08	1.393	0.143951
				0.08	2.954	0.11	9.044	0.14	6.8866	0.21	6.433	0.25	20.069					0.01	2.954	0.05	9.044	0.06	6.8866	0.07	8.162	0.1	20.069					0.08	2.954	0.47041
				0.08	2.1	0.11	0.742	0.14	8.5456	0.21	4.571	0.25	18.641					0.01	2.1	0.05	0.742	0.06	8.5456	0.07	14.28	0.1	18.641					0.08	2.1	0.322219
				0.08	1.995	0.11	2.289	0.14	7.5348	0.21	4.69	0.25	19.278					0.01	1.995	0.05	2.289	0.06	7.5348	0.07	6.167	0.1	19.278					0.08	1.995	0.299943
				0.08	3.059	0.11	0.994	0.14	3.3586	0.21	7.665	0.25	50.673					0.01	3.059	0.05	0.994	0.06	3.3586	0.07	3.003	0.1	50.673					0.08	3.059	0.485579
				0.08	3.759	0.11	0.371	0.14	15.9222	0.21	6.209	0.25	4.137					0.01	3.759	0.05	0.371	0.06	15.9222	0.07	22.946	0.1	4.137					0.08	3.759	0.575072
				0.08	1.162	0.11	1.05	0.14	0.805	0.21	9.282	0.25	7.077					0.01	1.162	0.05	1.05	0.06	0.805	0.07	3.542	0.1	7.077					0.08	1.162	0.0652061
				0.08	2.366	0.11	1.533	0.14	6.0508	0.21	4.641	0.25	4.431					0.01	2.366	0.05	1.533	0.06	6.0508	0.07	4.655	0.1	4.431					0.08	2.366	0.374015
				0.08	1.281	0.11	1.225	0.14	5.705	0.21	7.35	0.25	18.641					0.01	1.281	0.05	1.225	0.06	5.705	0.07	3.255	0.1	18.641					0.08	1.281	0.107549
				0.08	1.19	0.11	0.903	0.14	5.3872	0.21	15.47	0.25	28.035					0.01	1.19	0.05	0.903	0.06	5.3872	0.07	2.044	0.1	28.035					0.08	1.19	0.075547
				0.08	4.081	0.11	1.337	0.14	1.5218	0.21	6.188	0.25	4.284					0.01	4.081	0.05	1.337	0.06	1.5218	0.07	3.059	0.1	4.284					0.08	4.081	0.610767
				0.08	8.659	0.11	1.974	0.14	5.8408	0.21	7.665	0.25	6.748					0.01	8.659	0.05	1.974	0.06	5.8408	0.07	12.25	0.1	6.748					0.08	8.659	0.937468
				0.08	10.108	0.11	0.511	0.14	4.9042	0.21	6.307	0.25	6.608					0.01	10.108	0.05	0.511	0.06	4.9042	0.07	2.611	0.1	6.608					0.08	10.108	1.00467
				0.08	0.959	0.11	0.854	0.14	1.5666	0.21	6.363	0.25	4.424					0.01	0.959	0.05	0.854	0.06	1.5666	0.07	6.202	0.1	4.424					0.08	0.959	-0.0181814
				0.08	1.113	0.11	2.877	0.14	6.9202	0.21	4.641	0.25	6.216					0.01	1.113	0.05	2.877	0.06	6.9202	0.07	7.091	0.1	6.216					0.08	1.113	0.0464952
				0.08	1.568	0.11	9.219	0.14	6.1418	0.21	10.808	0.25	7.301					0.01	1.568	0.05	9.219	0.06	6.1418	0.07	1.596	0.1	7.301					0.08	1.568	0.195346
				0.08	1.505	0.11	0.651	0.14	0.735	0.21	12.523	0.25	73.5					0.01	1.505	0.05	0.651	0.06	0.735	0.07	12.152	0.1	10.668					0.08	1.505	0.177536
				0.08	1.155	0.11	7.665	0.14	2.7902	0.21	4.641							0.01	1.155	0.05	7.665	0.06	2.7902	0.07	7.483	0.1	7.973					0.08	1.155	0.062582
				0.08	2.947	0.11	1.218	0.14	6.6997	0.21	6.118							0.01	2.947	0.05	1.218	0.06	6.6997	0.07	11.571	0.1	9.744					0.08	2.947	0.46938
				0.08	1.372	0.11	1.589	0.14	2.6208	0.21	10.549							0.01	1.372	0.05	1.589	0.06	2.6208	0.07	5.677	0.1	10.857					0.08	1.372	0.137354
				0.08	2.177	0.11	2.59	0.14	2.2106	0.21	10.738							0.01	2.177	0.05	2.59	0.06	2.2106	0.07	22.155	0.1	15.26					0.08	2.177	0.337858
				0.08	3.22	0.11	0.994	0.14	0.8862	0.21	13.783							0.01	3.22	0.05	0.994	0.06	0.8862	0.07	18.214	0.1	17.227					0.08	3.22	0.507856
				0.08	2.653	0.11	10.276	0.14	2.9778	0.21	15.26							0.01	2.653	0.05	10.276	0.06	2.9778	0.07	4.697	0.1	6.307					0.08	2.653	0.423737
				0.08	1.596	0.11	0.511	0.14	1.085	0.21	17.584							0.01	1.596	0.05	0.511	0.06	1.085	0.07	11.872	0.1	9.261					0.08	1.596	0.203033
				0.08	2.814	0.11	0.882	0.14	5.4894	0.21	10.689							0.01	2.814	0.05	0.882	0.06	5.4894	0.07	2.674	0.1	10.024					0.08	2.814	0.449324
				0.08	1.918	0.11	1.022	0.14	6.9846	0.21	3.115							0.01	1.918	0.05	1.022	0.06	6.9846	0.07	5.656	0.1	11.76					0.08	1.918	0.282849
				0.08	1.197			0.14	11.5948	0.21	9.072							0.01	1.197			0.06	11.5948	0.07	10.381	0.1	16.786					0.08	1.197	0.0780942
				0.08	2.548			0.14	1.0724	0.21	15.4							0.01	2.548			0.06	1.0724	0.07	2.093	0.1	12.796					0.08	2.548	0.406199
				0.08	1.484			0.14	4.3652	0.21	14.847							0.01	1.484			0.06	4.3652	0.07	7.336	0.1	9.002					0.08	1.484	0.171434
				0.08	1.869			0.14	2.499	0.21	13.923							0.01	1.869			0.06	2.499	0.07	7.294	0.1	9.429					0.08	1.869	0.271609
				0.08	1.708			0.14	6.3882	0.21	16.492							0.01	1.708			0.06	6.3882	0.07	6.041	0.1	9.38					0.08	1.708	0.232488
				0.08	3.255			0.14	2.5396	0.21	10.759							0.01	3.255			0.06	2.5396	0.07	13.699	0.1	15.33					0.08	3.255	0.512551
				0.08	1.085			0.14	3.8192	0.21	9.373							0.01	1.085			0.06	3.8192	0.07	10.549	0.1	12.74					0.08	1.085	0.0354297
				0.08	2.163			0.14	6.321	0.21	7.854							0.01	2.163			0.06	6.321	0.07	8.61	0.1	12.096					0.08	2.163	0.335057
				0.08	0.343			0.14	17.4034	0.21	4.284							0.01	0.343			0.06	17.4034	0.07	16.345	0.1	4.501					0.08	0.343	-0.464706
				0.08	1.218			0.14	3.9396	0.21	4.69							0.01	1.218			0.06	3.9396	0.07	9.156	0.1	12.376					0.08	1.218	0.0856473
				0.08	2.093			0.14	2.9232	0.21	3.808							0.01	2.093			0.06	2.9232	0.07	24.122	0.1	7.756					0.08	2.093	0.320769
				0.08	8.757			0.14	2.2624	0.21	6.713							0.01	8.757			0.06	2.2624	0.07	17.78	0.1	6.048					0.08	8.757	0.942355
				0.08	7.637			0.14	2.1252	0.21	4.501							0.01	7.637			0.06	2.1252	0.07	8.568	0.1	6.048					0.08	7.637	0.882923
				0.08	1.393			0.14	3.7898	0.21	6.832							0.01	1.393			0.06	3.7898	0.07	2.926	0.1	5.866					0.08	1.393	0.143951
				0.08	1.596			0.14	3.5266	0.21	3.024							0.01	1.596			0.06	3.5266			0.1	2.296					0.08	1.596	0.203033
				0.08	1.372			0.14	2.8539	0.21	12.285							0.01	1.372			0.06	2.8539			0.1	6.832					0.08	1.372	0.137354
				0.08	9.506			0.14	7.2408	0.21	11.921							0.01	9.506			0.06	7.2408			0.1	4.641					0.08	9.506	0.977998
				0.08	1.218			0.14	7.3206	0.21	10.983							0.01	1.218			0.06	7.3206			0.1	0.434					0.08	1.218	0.0856473
				0.08	7.182					0.21	12.026							0.01	7.182							0.1	9.597					0.08	7.182	0.856245
				0.08	1.967					0.21	10.549							0.01	1.967							0.1	4.802					0.08	1.967	0.293804
				0.08	8.043					0.21	7.889							0.01	8.043							0.1	3.213					0.08	8.043	0.905418
										0.21	15.043															0.1	1.596					0.11	0.252	-0.598599
										0.21	7.735															0.1	10.444					0.11	0.567	-0.246417
										0.21	7.693															0.1	6.293					0.11	1.071	0.0297895
										0.21	37.009															0.1	6.433					0.11	1.659	0.219846
										0.21	2.723															0.1	4.571					0.11	7.357	0.866701
										0.21	6.181															0.1	4.69					0.11	2.772	0.442793
										0.21	19.313															0.1	7.665					0.11	9.163	0.962038
										0.21	0.546															0.1	6.209					0.11	2.485	0.395326
										0.21	2.212															0.1	9.282					0.11	0.483	-0.316053
										0.21	14.833															0.1	4.641					0.11	2.191	0.340642
										0.21	4.333															0.1	7.35					0.11	2.135	0.329398
										0.21	4.837															0.1	15.47					0.11	13.636	1.13469
										0.21	14.371															0.1	6.188					0.11	1.218	0.0856473
										0.21	2.128															0.1	7.665					0.11	6.93	0.840733
										0.21	8.953															0.1	6.307					0.11	2.303	0.362294
										0.21	7.105															0.1	6.363					0.11	9.044	0.956361
										0.21	5.453															0.1	4.641					0.11	8.925	0.950608
										0.21	36.134															0.1	10.808					0.11	3.136	0.496376
										0.21	10.227															0.1	12.523					0.11	2.618	0.41797
										0.21	5.999															0.1	4.641					0.11	1.316	0.119256
										0.21	1.267															0.1	6.118					0.11	2.723	0.435048
										0.21	18.928															0.1	10.549					0.11	3.129	0.495406
										0.21	11.592															0.1	10.738					0.11	2.303	0.362294
										0.21	5.285															0.1	13.783					0.11	1.393	0.143951
										0.21	4.459															0.1	15.26					0.11	3.675	0.565257
										0.21	4.053															0.1	17.584					0.11	1.869	0.271609
										0.21	6.132															0.1	10.689					0.11	0.196	-0.707744
										0.21	16.821															0.1	3.115					0.11	0.854	-0.0685421
										0.21	1.008															0.1	9.072					0.11	0.567	-0.246417
										0.21	6.832															0.1	15.4					0.11	1.603	0.204934
										0.21	7.112															0.1	14.847					0.11	8.813	0.945124
										0.21	10.528															0.1	13.923					0.11	2.142	0.330819
										0.21	8.015															0.1	16.492					0.11	1.316	0.119256
										0.21	8.162															0.1	10.759					0.11	1.449	0.161068
										0.21	14.28															0.1	9.373					0.11	9.044	0.956361
										0.21	6.167															0.1	7.854					0.11	0.742	-0.129596
										0.21	3.003															0.1	4.284					0.11	2.289	0.359646
										0.21	22.946															0.1	4.69					0.11	0.994	-0.00261362
										0.21	3.542															0.1	3.808					0.11	0.371	-0.430626
										0.21	4.655															0.1	6.713					0.11	1.05	0.0211893
										0.21	3.255															0.1	4.501					0.11	1.533	0.185542
										0.21	2.044															0.1	6.832					0.11	1.225	0.0881361
										0.21	3.059															0.1	3.024					0.11	0.903	-0.0443122
										0.21	12.25															0.1	12.285					0.11	1.337	0.126131
										0.21	2.611															0.1	11.921					0.11	1.974	0.295347
										0.21	6.202															0.1	10.983					0.11	0.511	-0.291579
										0.21	7.091															0.1	12.026					0.11	0.854	-0.0685421
										0.21	1.596															0.1	10.549					0.11	2.877	0.45894
										0.21	12.152															0.1	13.307					0.11	9.219	0.964684
										0.21	7.483																					0.11	0.651	-0.186419
										0.21	11.571																					0.11	7.665	0.884512
										0.21	5.677																					0.11	1.218	0.0856473
										0.21	22.155																					0.11	1.589	0.201124
										0.21	18.214																					0.11	2.59	0.4133
										0.21	4.697																					0.11	0.994	-0.00261362
										0.21	11.872																					0.11	10.276	1.01182
										0.21	2.674																					0.11	0.511	-0.291579
										0.21	5.656																					0.11	0.882	-0.0545314
										0.21	10.381																					0.11	1.022	0.0094509
										0.21	2.093																					0.14	1.4812	0.170614
										0.21	7.336																					0.14	4.2364	0.626997
										0.21	7.294																					0.14	2.0118	0.303585
										0.21	6.041																					0.14	1.6268	0.211334
										0.21	13.699																					0.14	3.1052	0.49209
										0.21	10.549																					0.14	2.3408	0.369364
										0.21	8.61																					0.14	2.0118	0.303585
										0.21	16.345																					0.14	1.0318	0.0135955
										0.21	9.156																					0.14	5.5426	0.743714
										0.21	24.122																					0.14	7.7266	0.887988
										0.21	17.78																					0.14	5.5832	0.746883
										0.21	8.568																					0.14	3.1486	0.498117
										0.21	2.926																					0.14	1.3356	0.125676
																																0.14	2.0118	0.303585
																																0.14	3.7646	0.575719
																																0.14	2.6796	0.42807
																																0.14	5.7442	0.75923
																																0.14	4.0824	0.610916
																																0.14	0.595	-0.225483
																																0.14	3.5364	0.548561
																																0.14	3.2144	0.5071
																																0.14	0.805	-0.0942041
																																0.14	1.4406	0.158543
																																0.14	5.705	0.756256
																																0.14	1.6912	0.228195
																																0.14	5.4621	0.73736
																																0.14	1.5708	0.196121
																																0.14	13.4008	1.12713
																																0.14	2.6726	0.426934
																																0.14	1.8662	0.270958
																																0.14	4.3372	0.637209
																																0.14	5.117	0.709015
																																0.14	3.0296	0.481385
																																0.14	10.1486	1.00641
																																0.14	6.8866	0.838005
																																0.14	8.5456	0.931743
																																0.14	7.5348	0.877072
																																0.14	3.3586	0.526158
																																0.14	15.9222	1.202
																																0.14	0.805	-0.0942041
																																0.14	6.0508	0.781813
																																0.14	5.705	0.756256
																																0.14	5.3872	0.731363
																																0.14	1.5218	0.182358
																																0.14	5.8408	0.766472
																																0.14	4.9042	0.690568
																																0.14	1.5666	0.194958
																																0.14	6.9202	0.840119
																																0.14	6.1418	0.788296
																																0.14	0.735	-0.133713
																																0.14	2.7902	0.445635
																																0.14	6.6997	0.826055
																																0.14	2.6208	0.418434
																																0.14	2.2106	0.34451
																																0.14	0.8862	-0.0524683
																																0.14	2.9778	0.473896
																																0.14	1.085	0.0354297
																																0.14	5.4894	0.739525
																																0.14	6.9846	0.844142
																																0.14	11.5948	1.06426
																																0.14	1.0724	0.0303568
																																0.14	4.3652	0.640004
																																0.14	2.499	0.397766
																																0.14	6.3882	0.805379
																																0.14	2.5396	0.404765
																																0.14	3.8192	0.581972
																																0.14	6.321	0.800786
																																0.14	17.4034	1.24063
																																0.14	3.9396	0.595452
																																0.14	2.9232	0.465859
																																0.14	2.2624	0.354569
																																0.14	2.1252	0.3274
																																0.14	3.7898	0.578616
																																0.14	3.5266	0.547356
																																0.14	2.8539	0.455439
																																0.14	7.2408	0.859787
																																0.14	7.3206	0.864547
																																0.21	10.668	1.02808
																																0.21	7.973	0.901622
																																0.21	9.744	0.988737
																																0.21	10.857	1.03571
																																0.21	15.26	1.18355
																																0.21	17.227	1.23621
																																0.21	6.307	0.799823
																																0.21	9.261	0.966658
																																0.21	10.024	1.00104
																																0.21	11.76	1.07041
																																0.21	16.786	1.22495
																																0.21	12.796	1.10707
																																0.21	9.002	0.954339
																																0.21	9.429	0.974466
																																0.21	9.38	0.972203
																																0.21	15.33	1.18554
																																0.21	12.74	1.10517
																																0.21	12.096	1.08264
																																0.21	4.501	0.653309
																																0.21	12.376	1.09258
																																0.21	7.756	0.889638
																																0.21	6.048	0.781612
																																0.21	6.048	0.781612
																																0.21	5.866	0.768342
																																0.21	2.296	0.360972
																																0.21	6.832	0.834548
																																0.21	4.641	0.666612
																																0.21	0.434	-0.36251
																																0.21	9.597	0.982135
																																0.21	4.802	0.681422
																																0.21	3.213	0.506911
																																0.21	1.596	0.203033
																																0.21	10.444	1.01887
																																0.21	6.293	0.798858
																																0.21	6.433	0.808414
																																0.21	4.571	0.660011
																																0.21	4.69	0.671173
																																0.21	7.665	0.884512
																																0.21	6.209	0.793022
																																0.21	9.282	0.967642
																																0.21	4.641	0.666612
																																0.21	7.35	0.866287
																																0.21	15.47	1.18949
																																0.21	6.188	0.79155
																																0.21	7.665	0.884512
																																0.21	6.307	0.799823
																																0.21	6.363	0.803662
																																0.21	4.641	0.666612
																																0.21	10.808	1.03375
																																0.21	12.523	1.09771
																																0.21	4.641	0.666612
																																0.21	6.118	0.786609
																																0.21	10.549	1.02321
																																0.21	10.738	1.03092
																																0.21	13.783	1.13934
																																0.21	15.26	1.18355
																																0.21	17.584	1.24512
																																0.21	10.689	1.02894
																																0.21	3.115	0.493458
																																0.21	9.072	0.957703
																																0.21	15.4	1.18752
																																0.21	14.847	1.17164
																																0.21	13.923	1.14373
																																0.21	16.492	1.21727
																																0.21	10.759	1.03177
																																0.21	9.373	0.971879
																																0.21	7.854	0.895091
																																0.21	4.284	0.631849
																																0.21	4.69	0.671173
																																0.21	3.808	0.580697
																																0.21	6.713	0.826917
																																0.21	4.501	0.653309
																																0.21	6.832	0.834548
																																0.21	3.024	0.480582
																																0.21	12.285	1.08938
																																0.21	11.921	1.07631
																																0.21	10.983	1.04072
																																0.21	12.026	1.08012
																																0.21	10.549	1.02321
																																0.21	7.889	0.897022
																																0.21	15.043	1.17733
																																0.21	7.735	0.88846
																																0.21	7.693	0.886096
																																0.21	37.009	1.56831
																																0.21	2.723	0.435048
																																0.21	6.181	0.791059
																																0.21	19.313	1.28585
																																0.21	0.546	-0.262807
																																0.21	2.212	0.344785
																																0.21	14.833	1.17123
																																0.21	4.333	0.636789
																																0.21	4.837	0.684576
																																0.21	14.371	1.15749
																																0.21	2.128	0.327972
																																0.21	8.953	0.951969
																																0.21	7.105	0.851564
																																0.21	5.453	0.736635
																																0.21	36.134	1.55792
																																0.21	10.227	1.00975
																																0.21	5.999	0.778079
																																0.21	1.267	0.102777
																																0.21	18.928	1.2771
																																0.21	11.592	1.06416
																																0.21	5.285	0.723045
																																0.21	4.459	0.649237
																																0.21	4.053	0.607777
																																0.21	6.132	0.787602
																																0.21	16.821	1.22585
																																0.21	1.008	0.00346053
																																0.21	6.832	0.834548
																																0.21	7.112	0.851992
																																0.21	10.528	1.02235
																																0.21	8.015	0.903904
																																0.21	8.162	0.911797
																																0.21	14.28	1.15473
																																0.21	6.167	0.790074
																																0.21	3.003	0.477555
																																0.21	22.946	1.36071
																																0.21	3.542	0.549249
																																0.21	4.655	0.66792
																																0.21	3.255	0.512551
																																0.21	2.044	0.310481
																																0.21	3.059	0.485579
																																0.21	12.25	1.08814
																																0.21	2.611	0.416807
																																0.21	6.202	0.792532
																																0.21	7.091	0.850707
																																0.21	1.596	0.203033
																																0.21	12.152	1.08465
																																0.21	7.483	0.874076
																																0.21	11.571	1.06337
																																0.21	5.677	0.754119
																																0.21	22.155	1.34547
																																0.21	18.214	1.26041
																																0.21	4.697	0.671821
																																0.21	11.872	1.07452
																																0.21	2.674	0.427161
																																0.21	5.656	0.752509
																																0.21	10.381	1.01624
																																0.21	2.093	0.320769
																																0.21	7.336	0.865459
																																0.21	7.294	0.862966
																																0.21	6.041	0.781109
																																0.21	13.699	1.13669
																																0.21	10.549	1.02321
																																0.21	8.61	0.935003
																																0.21	16.345	1.21338
																																0.21	9.156	0.961706
																																0.21	24.122	1.38241
																																0.21	17.78	1.24993
																																0.21	8.568	0.932879
																																0.21	2.926	0.466274
																																0.25	72.254	1.85886
																																0.25	22.414	1.35052
																																0.25	34.391	1.53644
																																0.25	21.217	1.32668
																																0.25	18.298	1.2624
																																0.25	28.189	1.45008
																																0.25	59.325	1.77324
																																0.25	18.34	1.2634
																																0.25	24.178	1.38342
																																0.25	20.342	1.30839
																																0.25	32.879	1.51692
																																0.25	30.394	1.48279
																																0.25	32.76	1.51534
																																0.25	40.145	1.60363
																																0.25	18.165	1.25924
																																0.25	18.55	1.26834
																																0.25	20.671	1.31536
																																0.25	5.383	0.731024
																																0.25	33.53	1.52543
																																0.25	13.622	1.13424
																																0.25	21.147	1.32525
																																0.25	4.151	0.618153
																																0.25	5.481	0.73886
																																0.25	2.009	0.30298
																																0.25	11.382	1.05622
																																0.25	4.123	0.615213
																																0.25	53.921	1.73176
																																0.25	20.419	1.31003
																																0.25	6.244	0.795463
																																0.25	22.554	1.35322
																																0.25	2.52	0.401401
																																0.25	21.742	1.3373
																																0.25	6.979	0.843793
																																0.25	11.06	1.04376
																																0.25	20.069	1.30253
																																0.25	18.641	1.27047
																																0.25	19.278	1.28506
																																0.25	50.673	1.70478
																																0.25	4.137	0.616686
																																0.25	7.077	0.849849
																																0.25	4.431	0.646502
																																0.25	18.641	1.27047
																																0.25	28.035	1.4477
																																0.25	4.284	0.631849
																																0.25	6.748	0.829175
																																0.25	6.608	0.82007
																																0.25	4.424	0.645815
																																0.25	6.216	0.793511
																																0.25	7.301	0.863382
																																0.25	73.5	1.86629

## Sheet: Figure 9
		Lat N	carbon mean g.m-2 = t.km-2	Carbon SD	Lat S	carbon mean g.m-2 = t.km-2	Carbon SD
	B3	72.63	11.3059	4.14538	54.5	0.3065	0.172543
	B13	74.5	4.41044	3.29126	54.4	0.862573	0.703115
	B14	76.5005	3.23134	3.17377	54.3	1.30357	0.92569
	B15	78.3	2.95801	2.25785	55	0.591862	1.09112
	B16	80.1145	20.4348	15.7608	54.7	1.20833	1.27806
	B17	81.3012	9.96453	7.32838	55.2	0.512	0.109179
					54.3	1.71	0.554746
	Data from Tab 'Carbon content' column CH				54.2	0.426714	0.137096
KEY					53.5	0.4816	0.266211
B=site (Arctic)					55.4	0.863333	0.26
C=Arctic latitude					59.8	8.649	1.358
D=zoobenthic carbon stock mean					60	6.035	1.16
E=zoobenthic carbon SD					60.3	7.425	1.44
					60.7	7.78	1.53
F=Antarctic latitude (colours are Deep red=South Georgia, Red = South Orkney, Black = Bellingshausen, Dark Blue = Weddell, light blue = Amundsen					66.2	4.788	0.95
G=Antarctic carbon stock mean					66.4	4.0044	0.776047
H=Antarctic Carbon SD					67.05	4.51096	0.904
					67.15	3.9292	0.76
					67.55	3.85464	0.767856
					67.75	4.74337	0.939282
					68	3.47	0.694
					70.04	9.03	2.36
					71.07	8.23	1.65
					72.5	7.74	1.78
					70.3	6.92	1.09
					72.5	4.76	0.94
					71.9	0.311	0.095
					74.4	0.382	0.06
					73.9	0.335	0.084
					71.3	0.402	0.07

## Sheet: data for Arctic vs Antarctic co
		Pole	Site	Zoobenthic C g.m-2	Box Cox transformed data from column E		Pole	Site	Zoobenthic C g.m-2	Box Cox transformed data from column J
		2	1	13.9531	2.97489		1	1	0.435	0.659545
C-F Barents Sea data		2	1	9.7475	1.86279		1	1	0.275	0.524404
C = region (Arctic)		2	1	11.6914	2.61151		1	1	0.1	0.316228
D = site (B3=1,B13=2,B14=3,B15=4,B16=5,B17=6)		2	1	12.5132	1.60312		1	1	0.05	0.223607
E = Zoobenthic carbon stock (storage)		2	1	17.1528	3.13209		1	1	0.285	0.533854
F=BoxCox transformed data		2	1	19.411	2.81247		1	1	0.55	0.74162
		2	1	8.3454	3.54119		1	1	0.275	0.524404
H-K = Antarctic data		2	1	12.3186	3.0133		1	1	0.31	0.556776
H = region (Antarctic)		2	1	13.7186	3.28938		1	1	1.1	1.04881
I = site (SouthGeorgia=1,SouthOrkney=2Bellingshausen=3,Weddell=4,Amundsen=5)		2	1	14.2352	3.20156		1	1	0.25	0.5
J = Zoobenthic carbon stock (storage)		2	1	18.97	2.88617		1	1	0.01	0.1
K=BoxCox transformed data		2	1	16.1448	2.99833		1	1	0.275	0.524404
		2	1	11.2406	2.62107		1	1	0.375	0.612372
		2	1	11.3218	3.10805		1	1	0.275	0.524404
		2	1	11.8552	2.12368		1	1	0.01	0.1
		2	1	17.3684	2.66083		1	1	0.6	0.774597
		2	1	14.6874	2.52587		1	1	0.5	0.707107
		2	1	14.1344	2.83725		1	1	0.5	0.707107
		2	1	6.8306	2.67021		1	1	0.4	0.632456
		2	1	15.4336	3.1241		1	1	0.6	0.774597
		2	1	9.5032	2.95804		1	1	3.706	1.9251
		2	1	8.5232	2.77128		1	1	0.26	0.509902
		2	1	8.96	2.29129		1	1	0.73	0.8544
		2	1	7.4676	2.74408		1	1	0.96	0.979796
		2	1	5.3536	1.86815		1	1	1.145	1.07005
		2	1	8.1424	2.64008		1	1	0.32	0.565685
		2	1	7.2618	2.85482		1	1	0.47	0.685565
		2	1	2.7636	2.54755		1	1	0.87	0.932738
		2	1	10.7618	2.09284		1	1	0.3623	0.601914
		2	1	6.1124	2.0664		1	1	0.7075	0.84113
		2	1	5.2514	2.61725		1	1	0.725	0.851469
		2	1	3.052	2.25832		1	1	0.8215	0.906366
		2	1	12.3368	2.82135		1	1	1.69	1.3
		2	1	8.3314	1.53948		1	1	3.12	1.76635
		2	1	8.617	2.498		1	1	0.905	0.951315
		2	1	7.9198	1.21655		1	1	1.364	1.1679
		2	1	7.3108	2.76043		1	1	0.835	0.913783
		2	1	9.849	1.65831		1	1	2.92	1.7088
		2	1	7.665	2.28692		1	1	0.355	0.595819
		2	1	11.3204	2.06155		1	1	0.515	0.717635
		2	1	5.8058	1.75784		1	1	0.985	0.992472
		2	1	8.9516	0.458258		1	1	0.4525	0.672681
		2	1	17.2172	0.67082		1	1	0.41	0.640312
		2	1	7.0616	0.8		1	1	0.75	0.866025
		2	1	8.9754	0.685565		1	1	0.635	0.796869
		2	1	7.3262	0.424264		1	1	0.39123	0.625484
		2	1	8.1102	0.714143		1	1	0.30855	0.555473
		2	1	5.8058	0.509902		1	1	0.01	0.1
		2	1	14.448	0.424264		1	1	1.42	1.19164
		2	1	16.1266	0.648074		1	1	0.864	0.929516
		2	1	7.6076	0.282843		1	1	1.4	1.18322
		2	1	7.8652	0.458258		1	1	1.835	1.35462
		2	1	12.1506	0.591608		1	1	1.75	1.32288
		2	1	12.3942	0.519615		1	1	2.015	1.41951
		2	1	15.5302	0.360555		1	1	0.985	0.992472
		2	1	17.353	0.69282		1	1	1.135	1.06536
		2	1	19.3312	0.469042		1	1	1.81	1.34536
		2	1	12.782	0.591608		1	1	2.75	1.65831
		2	1	7.4466	0.583095		1	1	0.507	0.712039
		2	1	11.1104	0.905539		1	1	0.495	0.703562
		2	1	19.1856	0.374166		1	1	0.315	0.561249
		2	1	17.9319	0.663325		1	1	0.675	0.821584
		2	1	16.3982	0.6		1	1	0.4	0.632456
		2	1	18.3484	0.519615		1	1	0.365	0.604152
		2	1	13.0886	0.331662		1	1	0.31	0.556776
		2	1	12.0484	0.768115		1	1	0.34	0.583095
		2	1	10.0926	0.685565		1	1	0.43	0.655744
		2	1	8.3608	0.616441		1	1	0.67	0.818535
		2	1	8.5302	1.0198		1	1	0.31	0.556776
		2	1	7.5936	0.479583		1	1	0.47	0.685565
		2	1	10.4622	0.67082		1	1	0.1	0.316228
		2	1	8.1956	0.3		1	1	0.31	0.556776
		2	1	9.5984	0.556776		1	1	0.06	0.244949
		2	1	5.6448	0.52915		1	1	0.1	0.316228
		2	1	15.4882	0.72111		1	1	0.23	0.479583
		2	1	14.2506	0.547723		1	1	3.06	1.74929
		2	1	13.3672	0.4		1	1	0.039	0.197484
		2	1	14.938	0.479583		1	1	0.01	0.1
		2	1	12.8786	0.781025		1	1	1.48	1.21655
		2	1	17.0926	0.67082		1	1	1.945	1.39463
		2	2	8.4014	0.6245		1	1	1.78	1.33417
		2	2	1.4812	0.509902		1	1	2.185	1.47817
		2	2	4.2364	0.519615		1	1	0.985	0.992472
		2	2	2.0118	0.648074		1	1	1.175	1.08397
		2	2	1.6268	0.424264		1	1	1.91	1.38203
		2	2	3.1052	0.565685		1	1	3.06	1.74929
		2	2	2.3408	0.52915		1	1	0.36	0.6
		2	2	2.0118	0.264575		1	1	0.29	0.538516
		2	2	1.0318	0.43589		1	1	0.828	0.909945
		2	2	5.5426	0.574456		1	1	0.7	0.83666
		2	2	7.7266	0.678233		1	1	0.43	0.655744
		2	2	5.5832	0.574456		1	1	0.59	0.768115
		2	2	3.1486	0.489898		1	1	1.64	1.28062
		2	2	1.3356	0.6245		1	1	0.85	0.921954
		2	2	2.0118	0.244949		1	1	0.69	0.830662
		2	2	3.7646	0.824621		1	1	0.98	0.989949
		2	2	2.6796	0.678233		1	1	0.51	0.714143
		2	2	5.7442	0.424264		1	1	1.64	1.28062
		2	2	4.0824	0.591608		1	1	1.26	1.1225
		2	2	0.595	0.655744		1	1	0.46	0.678233
		2	2	3.5364	0.509902		1	1	0.87	0.932738
		2	2	3.2144	0.67082		1	1	0.92	0.959166
		2	2	0.805	0.6245		1	1	0.58	0.761577
		2	2	1.4406	0.509902		1	1	0.33	0.574456
		2	2	5.705	0.714143		1	1	1.32	1.14891
		2	2	1.6912	0.648074		1	1	0.64	0.8
		2	2	5.4621	0.519615		1	1	1.39	1.17898
		2	2	1.5708	0.655744		1	1	0.665	0.815475
		2	2	13.4008	0.883176		1	1	0.31	0.556776
		2	2	2.6726	0.714143		1	1	0.47	0.685565
		2	2	1.8662	0.616441		1	1	0.665	0.815475
		2	2	4.3372	0.774597		1	1	0.39	0.6245
		2	2	5.117	3.73538		1	1	0.01	0.1
		2	2	3.0296	3.1221		1	1	0.16	0.4
		2	2	10.1486	3.41927		1	1	0.39	0.6245
		2	2	6.8866	3.5374		1	1	0.1	0.316228
		2	2	8.5456	4.14159		1	1	0.905	0.951315
		2	2	7.5348	4.40579		1	1	0.925	0.961769
		2	2	3.3586	2.88884		1	1	0.58	0.761577
		2	2	15.9222	3.50979		1	1	0.825	0.908295
		2	2	0.805	3.70386		1	1	0.32	0.565685
		2	2	6.0508	3.77296		1	1	1.12	1.0583
		2	2	5.705	4.35546		1	1	0.372	0.609918
		2	2	5.3872	4.01806		1	2	15.12	3.88844
		2	2	1.5218	3.3527		1	2	11.25	3.3541
		2	2	5.8408	3.36479		1	2	4.75	2.17945
		2	2	4.9042	3.44314		1	2	8.34	2.88791
		2	2	1.5666	4.16754		1	2	10.09	3.17648
		2	2	6.9202	3.83241		1	2	9.78	3.1273
		2	2	6.1418	3.75957		1	2	4.75	2.17945
		2	2	0.735	2.61354		1	2	5.11	2.26053
		2	2	2.7902	3.92856		1	2	11.12	3.33467
		2	2	6.6997	3.08273		1	2	4.02	2.00499
		2	2	2.6208	2.91945		1	2	3.025	1.73925
		2	2	2.2106	2.99333		1	2	4.85	2.20227
		2	2	0.8862	2.73269		1	2	9.09	3.01496
		2	2	2.9778	2.31378		1	2	7.48	2.73496
		2	2	1.085	2.85349		1	2	3.01	1.73494
		2	2	5.4894	2.69477		1	2	5.69	2.38537
		2	2	6.9846	1.66241		1	2	8.13	2.85132
		2	2	11.5948	3.28052		1	2	9.83	3.13528
		2	2	1.0724	2.47233		1	2	12.64	3.55528
		2	2	4.3652	2.29159		1	2	17.5	4.1833
		2	2	2.499	1.747		1	2	7.48	2.73496
		2	2	6.3882	3.51238		1	2	6.14	2.4779
		2	2	2.5396	2.88642		1	2	1.14	1.06771
		2	2	3.8192	2.93547		1	2	8.69	2.94788
		2	2	6.321	2.81421		1	2	5.6	2.36643
		2	2	17.4034	2.70385		1	2	0.681	0.825227
		2	2	3.9396	3.13831		1	2	8.95	2.99166
		2	2	2.9232	2.76857		1	2	5.01	2.2383
		2	2	2.2624	3.36458		1	2	2.83	1.68226
		2	2	2.1252	2.40952		1	2	4.29	2.07123
		2	2	3.7898	2.99192		1	2	10.62	3.25883
		2	2	3.5266	4.14936		1	2	8.51	2.91719
		2	2	2.8539	2.65737		1	2	12.67	3.55949
		2	2	7.2408	2.9959		1	2	14.83	3.85097
		2	2	7.3206	2.7067		1	2	7.75	2.78388
		2	3	0.98	2.84784		1	2	4.91	2.21585
		2	3	0.7126	2.40952		1	2	1.42	1.19164
		2	3	1.071	3.80105		1	2	7.31	2.7037
		2	3	1.8046	4.01579		1	3	5.28	0.659545
		2	3	7.357	2.75819		1	3	3.94	0.524404
		2	3	3.2088	2.8045		1	3	4.18	0.316228
		2	3	9.4542	3.48577		1	3	4.66	0.223607
		2	3	2.6306	3.52054		1	3	2.79	0.533854
		2	3	0.7742	3.94084		1	3	3.85	0.74162
		2	3	2.7734	4.16569		1	3	6.77	0.524404
		2	3	2.2806	4.39673		1	3	6.15	0.556776
		2	3	14.2184	3.57519		1	3	1.88	1.04881
		2	3	1.3636	2.72885		1	3	5.27	0.5
		2	3	7.0756	3.33323		1	3	5.91	0.1
		2	3	3.031	4.38014		1	3	4.42	0.524404
		2	3	9.3352	4.23461		1	3	7.34	0.612372
		2	3	9.2162	4.04947		1	3	5.56	0.524404
		2	3	3.136	4.2835		1	3	3.82	0.1
		2	3	2.7636	3.61782		1	3	6.12	0.774597
		2	3	1.316	3.47108		1	3	4.475	0.707107
		2	3	3.451	3.17689		1	3	2.51	0.707107
		2	3	3.4202	2.8915		1	3	3.48	0.632456
		2	3	2.4486	2.92065		1	3	5.27	0.774597
		2	3	1.5386	2.75565		1	3	4.19	1.9251
		2	3	3.9662	3.23453		1	3	8.12	0.509902
		2	3	2.0146	2.8628		1	3	6.09	0.8544
		2	3	0.7784	3.09813		1	3	4.815	0.979796
		2	3	1.1452	2.37588		1	3	5.09	1.07005
		2	3	1.1494	3.93551		1	3	3.61	0.565685
		2	3	2.0398	3.775		1	3	4.37	0.685565
		2	3	8.9586	3.65612		1	3	3.97	0.932738
		2	3	2.4332	3.86497		1	3	3.38	0.601914
		2	3	1.7528	3.58868		1	3	2.16	0.84113
		2	3	1.7402	4.13432		1	3	2.82	0.851469
		2	3	9.1896	2.89852		1	3	3.17	0.906366
		2	3	1.0332	1.21705		1	3	6.11	1.3
		2	3	2.5802	2.05825		1	3	2.86	1.76635
		2	3	1.1396	1.41838		1	3	4.03	0.951315
		2	3	0.6622	1.27546		1	3	3.61	1.1679
		2	3	1.1956	1.76216		1	3	4.97	0.913783
		2	3	1.6786	1.52997		1	3	8.12	1.7088
		2	3	1.6618	1.41838		1	3	3.28	0.595819
		2	3	1.0486	1.01578		1	3	4.13	0.717635
		2	3	1.6282	2.35427		1	3	3.26	0.992472
		2	3	2.1196	2.77968		1	3	5.61	0.672681
		2	3	1.0934	2.36288		1	3	2.74	0.640312
		2	3	1.1452	1.77443		1	3	0.98	0.866025
		2	3	3.4594	1.15568		1	3	4.39	0.796869
		2	3	9.6558	1.41838		1	3	3.06	0.625484
		2	3	0.7966	1.94026		1	3	2.95	0.555473
		2	3	7.9562	1.63695		1	3	4.81	0.1
		2	3	1.6548	2.39671		1	3	2.87	1.19164
		2	3	1.8802	2.02049		1	3	4.08	0.929516
		2	3	2.7356	0.771362		1	3	3.26	1.18322
		2	3	1.2852	1.88053		1	3	4.47	1.35462
		2	3	10.7128	1.79287		1	3	6.59	1.32288
		2	3	0.6566	0.897218		1	3	3.67	1.41951
		2	3	1.0276	1.20025		1	3	2.64	0.992472
		2	3	1.3132	2.38851		1	3	1.93	1.06536
		2	4	0.7056	1.30046		1	3	4.85	1.34536
		2	4	6.1852	2.33711		1	3	0.96	1.65831
		2	4	2.6236	1.25332		1	3	2.48	0.712039
		2	4	2.6124	3.66071		1	3	4.49	0.703562
		2	4	2.5718	1.63481		1	3	5.03	0.561249
		2	4	1.8242	1.36609		1	3	3.84	0.821584
		2	4	1.771	2.08259		1	3	4.23	0.632456
		2	4	2.0076	2.26208		1	3	4.48	0.604152
		2	4	1.7794	1.74057		1	3	7.37	0.556776
		2	4	2.3828	3.18569		1	3	3.62	0.583095
		2	4	1.9418	2.62423		1	3	6.96	0.655744
		2	4	2.1378	2.92329		1	3	4.67	0.818535
		2	4	2.3604	2.74496		1	3	2.97	0.556776
		2	4	1.2782	1.83265		1	3	3.61	0.685565
		2	4	1.1676	3.99026		1	3	4.91	0.316228
		2	4	1.6534	0.897218		1	3	5.46	0.556776
		2	4	1.6604	2.45984		1	3	3.61	0.244949
		2	4	2.6054	2.38851		1	3	2.88	0.316228
		2	4	4.9742	2.32103		1	3	4.92	0.479583
		2	4	2.0664	1.23361		1	3	3.32	1.74929
		2	4	2.9106	2.41677		1	3	3.89	0.197484
		2	4	2.4318	2.21454		1	3	4.75	0.1
		2	4	3.4356	1.25164		1	3	5.05	1.21655
		2	4	1.7948	2.63063		1	3	3.87	1.39463
		2	4	1.1466	2.47827		1	3	6.93	1.33417
		2	4	8.596	0.857321		1	3	3.25	1.47817
		2	4	1.2278	1.67039		1	3	2.73	0.992472
		2	4	2.0552	2.58838		1	3	4.37	1.08397
		2	4	2.5942	1.61889		1	3	2.86	1.38203
		2	4	1.6212	1.48681		1	3	3.79	1.74929
		2	4	1.4812	0.941382		1	3	3.47	0.6
		2	4	0.791	1.72563		1	3	1.98	0.538516
		2	4	2.359	1.04163		1	3	2.49	0.909945
		2	4	1.8298	2.34295		1	3	3.41	0.83666
		2	4	3.3908	2.64284		1	3	5.1	0.655744
		2	4	3.2648	3.40511		1	3	3.02	0.768115
		2	4	2.2862	1.03557		1	3	3.97	1.28062
		2	4	3.3502	2.08931		1	3	4.46	0.921954
		2	4	4.5962	1.58082		1	3	5.95	0.830662
		2	4	1.89	2.52749		1	3	2.07	0.989949
		2	4	2.6572	1.59361		1	3	4.74	0.714143
		2	4	1.7178	1.95428		1	3	3.38	1.28062
		2	4	1.4812	2.51416		1	3	4.09	1.1225
		2	4	4.718	4.17174		1	3	4.47	0.678233
		2	4	9.5872	1.98484		1	4	14.86	0.932738
		2	4	10.836	1.70974		1	4	11.645	0.959166
		2	4	1.687	1.50413		1	4	8.185	0.761577
		2	4	1.9502	1.45781		1	4	8.97	0.574456
		2	4	2.1504	1.94674		1	4	12.11	1.14891
		2	4	1.9418	1.87792		1	4	3.76	0.8
		2	4	1.7374	1.68935		1	4	5.39	1.17898
		2	4	3.0926	2.69087		1	4	7.82	0.815475
		2	4	1.8088	2.70566		1	4	6.72	0.556776
		2	4	2.6138	0.989949		1	4	12.39	0.685565
		2	4	3.3656	0.844156		1	4	7.15	0.815475
		2	4	3.5266	1.03489		1	4	9.23	0.6245
		2	4	2.1784	1.34335		1	4	10.12	0.1
		2	4	2.9596	2.71238		1	4	8.09	0.4
		2	4	2.5004	1.79131		1	4	5.19	0.6245
		2	4	1.7794	3.07477		1	4	9.82	0.316228
		2	4	2.8392	1.62191		1	4	8.71	0.951315
		2	4	1.7752	0.879886		1	4	6.85	0.961769
		2	4	2.3058	1.66535		1	4	7.95	0.761577
		2	4	1.9992	1.51017		1	4	8.68	0.908295
		2	4	3.6918	3.77073		1	4	4.39	0.565685
		2	4	1.5218	1.16773		1	4	7.84	1.0583
		2	4	2.4542	2.66		1	4	10.08	0.609918
		2	4	0.4886	1.74098		1	4	11.05	3.88844
		2	4	1.6548	3.05536		1	4	8.85	3.3541
		2	4	2.5298	3.03582		1	4	3.47	2.17945
		2	4	9.1938	1.77088		1	4	6.82	2.88791
		2	4	7.7826	1.66241		1	4	2.57	3.17648
		2	4	1.5386	1.14717		1	4	9.81	3.1273
		2	4	1.7416	1.85769		1	4	7.91	2.17945
		2	4	1.6632	1.84938		1	4	12.54	2.26053
		2	4	9.9428	1.5648		1	4	9.08	3.33467
		2	4	1.3636	1.2404		1	4	10.82	2.00499
		2	4	7.7644	1.99153		1	4	10.25	1.73925
		2	4	2.2582	1.41937		1	4	8.33	2.20227
		2	4	8.4798	0.88227		1	4	8.99	3.01496
		2	5	73.5007	1.07014		1	4	6.87	2.73496
		2	5	23.2876	1.0721		1	4	9.66	1.73494
		2	5	35.4102	1.42822		1	4	4.51	2.38537
		2	5	21.6538	2.99309		1	4	7.08	2.85132
		2	5	19.4628	1.55987		1	4	6.38	3.13528
		2	5	28.9443	1.32393		1	4	8.05	3.55528
		2	5	60.1986	1.31917		1	4	7.13	4.1833
		2	5	19.3592	3.03144		1	4	9.76	2.73496
		2	5	25.0516	1.01646		1	4	8.75	2.4779
		2	5	21.2156	1.6063		1	4	7.68	1.06771
		2	5	33.6616	1.06752		1	4	5.25	2.94788
		2	5	31.031	0.813757		1	4	7.53	2.36643
		2	5	33.5153	1.09343		1	4	3.49	0.825227
		2	5	40.873	1.29561		1	4	6.97	2.99166
		2	5	19.1842	1.28911		1	4	8.15	2.2383
		2	5	19.1324	1.02401		1	4	6.49	1.68226
		2	5	21.4536	1.27601		1	4	4.38	2.07123
		2	5	6.4295	1.45588		1	4	4.27	3.25883
		2	5	34.258	1.04566		1	4	6.85	2.91719
		2	5	14.4956	1.07014		1	4	5.1	3.55949
		2	5	22.1935	1.85995		1	4	7.96	3.85097
		2	5	4.7334	3.10738		1	4	2.37	2.78388
		2	5	5.9178	0.892525		1	4	6.24	2.21585
		2	5	2.8826	2.82067		1	4	1.48	1.19164
		2	5	11.6732	1.28639		1	4	7.62	2.7037
		2	5	4.851	1.3712		1	4	2.75	0.659545
		2	5	55.0858	1.65396		1	4	5.23	0.524404
		2	5	21.4382	1.13367		1	4	4.25	0.316228
		2	5	7.4088	3.27304		1	4	3.09	0.223607
		2	5	23.1364	0.810309		1	5	0.21	0.533854
		2	5	2.9568	1.01371		1	5	0.45	0.74162
		2	5	22.5246	1.14595		1	5	0.64	0.524404
		2	5	7.4158	0.84		1	5	0.47	0.556776
		2	5	11.3512	2.48701		1	5	0.18	1.04881
		2	5	20.5058	1.61975		1	5	0.51	0.5
		2	5	19.5146	1.61629		1	5	0.26	0.1
		2	5	19.8604	1.60368		1	5	0.18	0.524404
		2	5	51.6922	1.35063		1	5	0.42	0.612372
		2	5	4.5738	1.33079		1	5	0.08	0.524404
		2	5	7.5138	1.4169		1	5	0.21	0.1
		2	5	5.159	1.33394		1	5	0.35	0.774597
		2	5	18.9322	1.54363		1	5	0.27	0.707107
		2	5	28.6174	1.39348		1	5	0.13	0.707107
		2	5	5.1576	1.46212		1	5	0.48	0.632456
		2	5	7.1848	1.53636		1	5	0.22	0.774597
		2	5	7.1904	1.13058		1	5	0.35	1.9251
		2	5	5.0337	1.08056		1	5	0.34	0.509902
		2	5	6.7984	1.28585		1	5	0.82	0.8544
		2	5	7.8834	1.28857		1	5	0.14	0.979796
		2	6	9.4906	1.61413		1	5	0.44	1.07005
		2	6	16.2078	2.23029		1	5	0.36	0.565685
		2	6	8.7542	1.4375		1	5	0.27	0.685565
		2	6	8.1298	1.70605		1	5	0.11	0.932738
		2	6	37.737	1.55942		1	5	0.59	0.601914
		2	6	3.9424	1.85354		1	5	0.47	0.84113
		2	6	7.9282	1.3397		1	5	0.38	0.851469
		2	6	19.7498	1.07079		1	5	1.04	0.906366
		2	6	1.274	2.93189		1	5	0.23	1.3
		2	6	3.2312	1.10806		1	5	0.45	1.76635
		2	6	16.1434	1.4336		1	5	0.09	0.951315
		2	6	5.2066	1.61065		1	5	0.31	1.1679
		2	6	6.0018	1.27326		1	5	0.28	0.913783
		2	6	15.1263	1.21705		1	5	0.52	1.7088
		2	6	2.856	0.889382		1	5	0.3	0.595819
		2	6	9.8266	1.5359		1	5	0.16	0.717635
		2	6	7.6874	1.3527		1	5	0.23	0.992472
		2	6	5.8898	1.84141		1	5	0.61	0.672681
		2	6	37.0076	1.80688		1	5	0.45	0.640312
		2	6	10.8094	1.51202		1	5	0.39	0.866025
		2	6	6.2902	1.83036		1	5	0.26	0.796869
		2	6	1.4126	2.14387		1	5	0.27	0.625484
		2	6	19.3648	1.37477		1	5	0.42	0.555473
		2	6	12.32	1.63009		1	5	0.18	0.1
		2	6	6.3042	1.31065		1	5	0.32	1.19164
		2	6	4.7502	1.21705		1	5	0.28	0.929516
		2	6	4.6354	2.1721		1	5	0.07	1.18322
		2	6	6.5688	3.09632		1	5	0.19	1.35462
		2	6	17.4034	3.29181		1	5	0.33	1.32288
		2	6	1.736	1.29885		1	5	0.46	1.41951
		2	6	7.4144	1.3965		1	5	0.33	0.992472
		2	6	7.4032	1.46642		1	5	0.24	1.06536
		2	6	11.1104	1.39348		1	5	0.39	1.34536
		2	6	8.1606	1.3181		1	5	0.06	1.65831
		2	6	8.5988	1.75858		1	5	0.68	0.712039
		2	6	14.5712	1.34492		1	5	0.46	0.703562
		2	6	6.4582	1.61673		1	5	0.18	0.561249
		2	6	3.5854	1.83456		1	5	0.35	0.821584
		2	6	23.2372	1.87792		1	5	0.43	0.632456
		2	6	3.6876	1.47594		1	5	0.26	0.604152
		2	6	5.0918	1.72035		1	5	0.45	0.556776
		2	6	3.4006	1.58127		1	5	0.39	0.583095
		2	6	2.1896	1.33394		1	5	0.26	0.655744
		2	6	3.787	1.68499		1	5	0.51	0.818535
		2	6	12.5412	1.33237		1	5	0.42	0.556776
		2	6	3.0478	1.51849		1	5	0.27	0.685565
		2	6	6.3476	1.41393		1	5	0.43	0.316228
		2	6	7.3822	1.92141		1	5	0.78	0.556776
		2	6	2.1784	1.23361		1	5	0.51	0.244949
		2	6	12.5888	1.56659		1	5	0.38	0.316228
		2	6	7.6286	0.698999		1	5	0.6	0.479583
		2	6	11.7166	1.28639
		2	6	5.9682	1.59053
		2	6	22.883	3.03213
		2	6	19.2332	2.78973
		2	6	5.5706	1.2404
		2	6	13.0368	1.3197
		2	6	3.6932	1.28965
		2	6	6.8481	3.15322
		2	6	11.837	1.16773
		2	6	3.1122	2.78647
		2	6	9.3744	1.50273
		2	6	8.6044	2.91201
		2	6	6.769	8.57325
		2	6	15.155	4.82572
		2	6	12.1506	5.95065
		2	6	10.2116	4.65336
		2	6	18.2378	4.41167
		2	6	9.884	5.37999
		2	6	25.8692	7.75878
		2	6	18.9448	4.39991
		2	6	10.024	5.00516
		2	6	4.0908	4.60604
